# Supplementary material for: Facing Costs With Dementia: Daily Lives Perspectives From Informal Caregivers
Source: Research Square preprint supplement (doi:10.21203/rs.3.rs-109248/v1), 2020-11-24
Supplement: Supplementary file 1 [file 24fe798cd353e12bb2d35d27.docx]

**Facing costs with dementia: daily lives perspectives from informal caregivers**

Patrícia Lindeza1, Ana Virgolino2, Osvaldo Santos2, Manuela Guerreiro3 and
Mário Miguel Rosa4

1Instituto de Saúde Ambiental (ISAMB), Faculdade de Medicina, Universidade de Lisboa, Portugal, patricialindeza@campus.ul.pt; 2Laboratório de Saúde Ambiental (EnviHeB Lab), Instituto de Saúde Ambiental (ISAMB), Faculdade de Medicina, Universidade de Lisboa, Portugal, avirgolino@medicina.ulisboa.pt, osantos@medicina.ulisboa.pt; 3Instituto de Medicina Molecular, Faculdade de Medicina, Universidade de Lisboa, Portugal, mmgguerreiro@gmail.com; 4Laboratório de Farmacologia e Terapêutica, Faculdade de Medicina, Universidade de Lisboa, Portugal, mrosa@medicina.ulisboa.pt.

Correspondence should be addressed to: Mário Miguel Rosa, Laboratório de Farmacologia e Terapêutica, Faculdade de Medicina, Universidade de Lisboa, Av. Prof. Egas Moniz | 1649-028 Lisboa, Portugal. Phone: +351 21 7802120; E-mail: mrosa@medicina.ulisboa.pt

**Supplementary material**

***Additional file 1***

*Focus Group* *Interview Script and Questionnaires applied to the caregiver*

***Additional file 2***

*Focus Group Corpus (Focus group A- Focus group D)*

***Additional file 3***

*Table 1 - Focus group participant quotes - caregiver changes in quality of life*

*Table 2- Focus group participant quotes - dementia informal care related costs*

*Table 3 - Focus group participant quotes - positive and negative aspects of formal care services*

***Additional file 1***

*Focus Group* *Interview Script*

1. INTRODUCTION

- Brief presentation of the study
- Objectives and rules of group discussion
- Presentation of the participants (warm up): Name, relation to the patient, live or not with the patient, profession they had or have

2. EXPERIENCE OF THE DISEASE, BY THE FAMILY CAREGIVER

- Experience with the disease as it progresses
- Daily changes determined by caring for the patient
- Time dedicated to the care of the person with dementia
- Physical, psychological, emotional and social overload
- Implications for the caregiver's quality of life

3. COSTS ASSOCIATED WITH DISEASE

- Main charges
- Direct costs, in personal, family, financial, ...
- Direct indirect costs, in personal, family, financial, ...

4. ASPECTS TO BE IMPROVED FOR INCREASING THE QOL OF INFORMAL CAREGIVERS

- Access to healthcare (for patients and caregivers)
- Information / Training / Training
- Sources of financial support

*Questionnaire of sociodemographic characterization - Informal caregiver*

1.Gender: (1) Male (2) Female

2. Age ________

3.Education:

(1) I haven’t study (0 years)

(2) Primary/Basic school (4 to 9 years)

(3) High School (10 to12 years)

(4) University (more of 12 years)

4.Professional status:

1. Full-time employee (6) Unemployed
2. Part-time employee (7) Medical leave
3. Worker-student (8) Early retirement
4. Student (9) Non-early retirement
5. Household (10) Disability pension

5.Relationship with the person cared:

(1) Husband (7) Nephew/niece

(2) Wife (8) Son-in-law/daughter-in-law

(3) Son (9) Grandson/granddaughter

(4) Daughter (10) Friend

(5) Sister (11) Other

(6) Brother which?________________

6. How long have you been caring for your relative?

(1) Between 1 and 2 years

(2) Between 3 to 5 years

(3) More than 5 years

7. How many daily hours of care have you dedicated in care(in the last 30 days)?

(1) Less than 1 hour (4) More than 10 hours

(2) 2 to 4 hours

(3) 5 to 7 hours

(3) 7 to 10 hours

8.Have you been facing life problems in the last 6-12 months?

1. No
2. Yes
3. Does not specify the type of problem
4. Death of a family member
5. Health problems
6. Several of the above

*Questionnaire of sociodemographic characterization - About the person cared*

1.Gender: (1) Male (2) Female

2. Age ________

3.Education:

(1) I haven’t study (0 years)

(2) Primary/Basic school (4 to 9 years)

(3) High School (10 to12 years)

(4) University (more of 12 years)

4.Professional status:

1. Full-time employee (6) Unemployed
2. Part-time employee (7) Medical leave
3. Worker-student (8) Early retirement
4. Student (9) Non-early retirement
5. Household (10) Disability pension

5. What is the diagnosis of the cared person?

1. Dementia
2. Alzheimer’s disease

6. Years since the diagnosis?________

7.Situation of the person being cared for:

1. Patient’s home
2. Caregiver’s home
3. Another family member’s home

(4) Instituion

v

Which?

(4.1) Nursing home

v

(4.2) Other?___________________________________

8.Formal care services utilization:

1. Not applicable
2. Day center
3. Home care services

***Additional file 2***

*Focus Group Corpus (Focus group A- Focus group D)*

***Focus Group* A**

M- Moderator

CM- Co-moderator

P1- Caregiver, male (husband)

P2- Caregiver, female (daughter)

P3- Caregiver, female (daughter)

M- Ora, obrigada por terem vindo, já assinaram o consentimento informado, já?...Ah... Já sabem o motivo da vinda cá, não é? A CM já falou com todos vocês com certeza, e também participaram na primeira parte do estudo que foi aquela altura do questionário, não é?...E nós convidámos para virem cá para conversarmos um pouco mais sobre a vossa experiência com esta doença e acerca dos vossos familiares. Isto aqui chama-se um *Focus Group*, o que significa que...é uma conversa...é uma conversa...eu tenho um trabalho fácil com a CM que é ir lançando temas juntamente com alguma pergunta ou outra, mas a ideia é vocês conversarem entre vocês...e portanto nós estamos cá mais para ouvir as vossas experiências e a vossa partilha. Ah...não há regras nenhumas, vocês podem...estão à vontade, falam quando querem, quando não querem não falam...A única coisa que pode sair daqui é andarmos à batatada todos, não é?... Mas fora isso, é basicamente... [ruído de fundo]

P1- Olhe que eu gostava...[risos] Andar à batata…. É verdade…

M- Ninguém vai andar à batatada...

P1- A pessoa quando anda à batatada tem melhor saúde…

M- É verdade, é verdade....

P2- Parece a minha mãe, ela anda e não tem saúde assim.…Ohoh...[risos]

M- Eu vou por isto a gravar, aliás a CM já pôs o dela não é, então eu vou por só para o caso de falhar alguma coisa...A ideia de gravarmos é só para depois podermos ouvir outra vez e fazer uma coisa que é analisar depois aqui, nós fazemos, será mais a CM que vai estar a fazer esse trabalho que é analisar os dados...e depois nós devolvemos algumas ideias centrais que saem desta reunião e de outras, portanto os dados vão ser analisados em conjunto com as outras reuniões que tivermos parecidas com esta...e depois vocês terão o que é que sai daqui e podem implementar também nessa altura se vos ocorrer mais alguma coisa...

P2- Sim senhora...

P1- Ao ler podemos ver qualquer coisa e corrigir...

M- É, é.…Podem corrigir, podem ver que “isto para mim não faz sentido” ...atenção que não vão ser só coisas que saem daqui, não é? Nós vamos fazer mais quantos *Focus Groups*?...São 6 não é? Ao todo...

CM- Quatro a cinco...

M- Quatro. Quatro a cinco...e, portanto, vocês depois vão receber é um apanhado de todos os *Focus Group* não é.…mas podem olhar...

P2- Para termos mais consciência de tudo...

M- Podem olhar para os resultados e dizer: "epá isto aqui, eu acrescentaria esta ideia que é muito importante...

P1- Posso fazer uma pergunta?

M- Pode pode…

P1- No meu caso é demência a minha mulher...

M- Exatamente…

P1- ...não é Alzheimer é parecido, mas…não é igual…

M- Ok...

P1- A senhora será também demência ou...

P2- A minha mãe é as duas coisas, foi sempre demente...sempre foi como…

M- Demência e alzheimer

P2- Sim...e agora o Alzheimer

M- Sim...já agora no seu caso?

P3- Eu acho que é só demência, mas...

M- Demência...pois…

P3- Mas...

M- Quer dizer, às vezes é difícil perceber... [Ruído de fundo]

P2- Por vezes é difícil, eu sei que a minha mãe teve demência porque desde nova teve sempre problemas.

M- Ok. Vamos começar por aí...se nos pudessem dizer o vosso nome e...

P2- (nome do participante)

M- (nome do participante)?

P2- (nome do participante)

M- Ok, e a P2, portanto é.… é a sua mãe? A sua mãe?

P2- A minha mãe…

M- Demência, portanto primeiro é o diagnóstico de demência...com que idade é que ela foi...

P2-...desde que me lembro de ser gente...

M- Portanto desde...

P2- A minha mãe já tinha...aliás acho que isto já é de família porque o meu avô materno, diziam que ele era maluco...chamavam a doença dos malucos, não é?

Portanto morreu novo, e sempre ouvi a minha avó dizer, tenho 3 tios, não é.…, portanto ela teve 4 filhos e dizia que só aquela filha (mãe da participante) tinha nascido com a doença do marido...e teve sempre episódios muito, muito tristes...

M- Ok..., mas quando é ficou mais, mais dependente, mais...

P2- Não, dependência, dependência foi agora...a partir dos 77, 76 anos mais ou menos…

M- Desde os 77... Mas quando é que começou a ter, a precisar de mais cuidados?... Com que idade? Só para...

P2- Ela foi sempre uma pessoa difícil e cuidados assim em termos físicos, ou que eu tivesse de tratar dela por causa da medicação...Não. Isso só de há dois anos para cá é que acontece episódios de dependência, dependência...até lá não...ela fazia...

M- Mas houve perda de memória, orientação?

P2- Começou a perder, mas era pouco...

M- Ok…

P2- Começou a perder pouco, quando começou foi rápido...

M- Com que idade? 50? É que começou a perder isso?

P2- Não, não, não, não. A minha mãe começou há mais ou menos 6 anos assim mais...pronto..., mas devagarinho...lá andava...

M- Ok, ok

P2- Como ela foi sempre terrível e muito difícil a pessoa até…, tá a ver.…às vezes, [risos]...vê aquelas coisas... 

M- Ok, ok

P2- É a doença...é a doença do pai, é a doença do pai...

M- Já agora para perceber mais uma coisa, ainda está em sua casa?

P2- Sim sim, eu estou com a minha mãe…

M- Ok...

P2- Eu é que fui para casa dela...

M- Ok...ah...A P2 é que foi para casa dela…

P2- Exato

M- O seu caso...?

P1- O meu caso é...

M- E o seu nome desculpe...?

P1- (nome completo do participante), o meu caso é diferente de quase todas as senhoras. A minha mulher foi sempre uma pessoa muito meiga muito..., e era, nós éramos comerciantes...de sapatos, que é muito difícil… Eu tive um balcão 47 anos...tinha quatro sapatarias, é muita coisa. Então ela lá aguentou até aos 68 anos que ela tem 73, vai fazê-los agora na terça-feira, quarta-feira... Ela pronto começou a esquecer-se, esquecer-se muito... Depois era muito nervosa, ia à máquina do multibanco, metia lá, não sabia tudo, e enervava-se...e eu comecei a topar...um dia fomos de férias para (localização). Deixou a chave dentro de casa...aí foi o princípio da grande desconfiança que eu já tinha. Foi até ao psiquiatra que é o Doutor A que acusou montes de pequeninos AVCs (acidentes vasculares cerebrais) na cabeça que lhe afetou o sistema cerebral nervoso.

M- Hum hum...

P1- No caso dela, no caso...segundo o que dizem as pessoas que sabem disso, muito grave...senão mesmo grave que é irreversível, transmissível e hereditário. Não sei as características…se as minha filhas podem ter apanhado cromossomas mais do lado dela... não estou certo, se foi do meu lado ou não...agora ah...de inicio começou, foi sempre muito calminha ao contrário de pessoas que me recordo muita gente, infelizmente há tanta gente assim camuflada, que não se conhece, muita gente não sabe muita coisa…a maior parte dos casos estão camuflados, ninguém sabe… e então havia lá no meu prédio, um senhor que era militar e segundo o que eu sei, é bom informar isto, como é se desenvolve como é que começou...a pessoa quando tem essa doença...ah...vai buscar aquilo que ela era na infância. Se ela era meiguinha continua meiguinha agora, se era agressiva é agressiva agora. E a prova da parte teórica com a parte prática, eu conheço lá um no meu prédio, que está internado agora, que era capitão do exército, então a mulher agarrava numa mala em casa, sacava tudo para fora, chamava-lhe nomes...esta casa é minha, tu nunca trabalhaste, não sei que mais e tinha a Parkinson também...a mulher um dia disse-me, a chorar para mim, que ele agora tava internado e …que batia-lhe mesmo, portanto não se pode dizer que a demência é igual.

M- No seu caso a sua mulher é meiguinha...ah...

P1- É meiguinha, sempre a rir-se...

M- Vive com ela ainda?

P1- Vivo com ela, tenho uma senhora que vai lá a casa para a pôr a dormir, para a acordar e sou eu que cuido dela, conheço-a.… a minha senhora não conhece. Aliás há uma coisa que quero que fique bem ciente nisto: só é possível aguentar-se o sofrimento que isto dá, primeiro na parte emocional que a gente tem, que é mulher, é pai, é mãe é o que for, irmão, irmã...tem que haver um grande amor para se aguentar, que há horas tão difíceis que apetece desanimar...caso contrário não se consegue. Pronto e depende também da pessoa que é, vamos imaginar que é a minha mulher é uma pessoa que tava doente nesse aspeto, vinham ter comigo e me davam 5 mil euros por mês e eu tava muito carenciado, uma hipótese...ah...eu dizia que não, preferia morrer de fome, andar a pedir pão...que é dificílimo levantar-se à meia noite...que ela quer ir à casa de banho, anda com a fralda de noite e de dia e depois e ela ri-se, só sabe rir-se, se lhe perguntar...

M- Só para perceber, em que...ela conheço-o? ah...

P1- Nem sempre, já um dia lá na… na (centro de dia)…

CM- Em (localização)…

P1- ...A primeira vez, ela agora está num centro de convívio e começou a gritar: "Pai, ó pai, ó pai..." e a (assistente do centro de dia) foi-me buscar, não. Então...o Doutor A deu-lhe então a trazadona a dobrar, que ela tomava esse, pouco ou quase nada, e essa agressão vinha daí, portanto deu-lhe isso para calmante e agora tá a tomar e desde aí está muito melhor...não se enerva nunca.

M- Antes, antes enervava-se um bocado...

P1- Ah, sim, não ela andava na ginástica em (localização) onde eu ia também, e para a vestir às 4 da tarde ela: "não, não não!" e agora… até ajuda…

M- Ok, deixe-me ouvir aqui a.…. Como é que se chama?

P3- (nome do participante)

M- (nome do participante)

P3- Ah, pronto no meu caso é um bocadinho...o meu irmão é médico, era...ah...tem 88 anos, ah... fez uma operação encef... começou por ter dificuldade em andar…

P2- Introcefálica, a minha mãe também fez essa operação...

P3- Portanto teve...nunca, nunca ligou muito, portanto aos médicos, as vezes só...

[risos]

P2- Os últimos [risos]

P3- Foi operado, portanto há coisa de 12 anos talvez...10 a 12 anos e... ficou a andar razoavelmente, quer dizer, prendia-se uma perna e ele ia assim a baixo, depois da operação teimou que saía,... e a gente saia com ele, de maneira que deixa-o ser um bocado independente e ele foi sempre independente, tratou dos pais muito bem, tanto a mãe como o pai, eles tiveram muito tempo.. o meu pai teve 11 anos, 12 anos dependente de tudo, como várias coisas...Agora chegou a vez dele mas ele tem hábitos de solteirão, viveu sempre sozinho [risos…], até que foi à coisa de 2 anos, 3 anos foi…Nós moramos, eu moro no segundo ele mora no primeiro, e como tava difícil, ele urinava-se e fazia pronto...era um bocado difícil e como tinha dificuldade passou a ficar comigo em baixo.

M- Neste momento está consigo?...

P3- Ah?

M- Neste momento está consigo?...

P3- Neste momento está comigo, tenho outra irmã, mas pronto...e é difícil. Ele não toma nada, não há remédios...ah…pronto...

P2- Não quer tomar?

P3- Não quer tomar, ele é que sabe...vestir-se é uma..., ainda hoje...é um teatro todos os dias,  mas depois chama muito por mim e eu sou a pessoa que estou assim mais perto, e agora presentemente às vezes, ah...o médico logo me disse quando ele foi operado: “olhe ele vai ter momentos muito bons, mas também vai ter muitos”...e tem realmente uma certa demência...propensão....

M- Digam-me uma coisa, vocês, no caso o P1 vive sozinho com a com a sua esposa? é?

P1- Sim é uma pessoa que…ela ah...chegou uma altura, que isto é progressivo, não é? Chegou uma altura que andava, sabe como os pardais assim aos passinhos...

P2- Aos passinhos...

P1- E muito curva para a frente...eu tinha que a segurar se não caia. Se se cansasse um bocadinho, eu ia leva-la a (localização), perto da mata de (localização), um sitio bom para a gente passear, andar...aquilo é um bocado ingreme e quando se cansava e tal, caia-me para o chão...eu aprendi muito com ela...há cinco anos que ando nisto. Ultimamente, meti-a na ginástica na (centro de fisioterapia)...ginástica adaptada no caso dela e foi o Doutor A que arranjou...Está muito melhor, melhorou epá não digo 100% mas anda bem, está a andar normalmente, mas não pode ser forçado...E não é isso, se lhe gritarem ela sente, ela sente o que é bom e o que é mau, sente o amargo e o doce...tem os sentidos todos apurados...e se alguém lhe gritar ela sente mas não chora, se lhe doer o braço ela dá sinal: "ai", mas não se queixa, ou seja, ela não diz: "doí-me este braço, doí-me esta perna, isto não presta"...não, está tudo bem...

M- Portanto tem de ser o P1 a estar atento...

P1- Quem está ao lado é que tem de saber, é como o porta-voz dela digamos assim.… já aprendi umas coisas, demência, tudo diferente uns dos outros...

M- É...

P1- Sim…

P3- O meu irmão presentemente está com muita dificuldade em andar, mas tem muita força de vontade [risos]...eu calculo…

M- E a P3 está com ele ou?

P3- Tenho uma irmã, mas que...

M- Mas na mesma casa?

P3- Na mesma casa

M- Ok

P3- E…e depois está com uma reforma, apesar de ser médico, muito pequena…

M- A reforma dele? Dele?

P3- Dele…

M- Ok, já vamos falar sobre essas coisas de reformas, que isso também é importante aqui. Está com o seu filho?

P2- Eu estou com o meu filho…

M- Está com o seu filho?

P2- O meu filho está lá em casa e, portanto, o meu companheiro também, neste momento, só que a minha mãe é muito difícil…

CM- Que idade é que tem o filho?

P2- O meu filho tem 41. A minha mãe é difícil de lidar, ela grita muito, se a gente a contraria, portanto, para o banho, a minha mãe tem horror ao banho. Uma mulher que às sete e meia da manhã tomava sempre o seu banhinho, dava a sua volta, não é?...e vinha para casa, era consumista, gastava muito dinheiro, era uma consumista nata, até que…

M- Portanto neste momento vocês estão aqui, a sua mãe está com quem?

P2- A minha mãe agora está sozinha.

M- Está sozinha? Ok

P2- Está sozinha. O meu filho fica 3 dias quando eu vou trabalhar, mas neste momento está. Temos câmaras para a poder vigiar, o meu filho está, portanto neste momento, está a vigiá-la através da câmara para ver e a minha tia mora no andar de baixo que é a mais nova, mas de qualquer maneira, nós sempre que saímos temos de estar sempre a controlar…

M- Com a câmara…ok

P2- Sim sim…

CM- Porque a P2 trabalha ainda?

P2- Sim sim eu trabalho…. É só …. É só atravessar a rua…

CM- Trabalha perto de casa?

P2- Exato, por acaso até agora…

M- Trabalha em que já agora?

P2- Trabalho numa loja de criança, de momento, porque o nosso historial de família são depressões

M- Depressões?

P2- Depressões…eu tive a minha primeira com vinte e um anos e depois gerei o meu filho com uma depressão muito grande, a tomar vinte e tal comprimidos por dia. O meu filho, neste momento tem estado comigo há dois anos, porque teve uma depressão profunda também.

M- Ok, e ele trabalha também?

P2- Ele neste momento começou a trabalhar, mas como ainda não está a 100%, portanto, vai 3 dias para os outros poder ainda descansar…E o que é ótimo porque assim fica com a mãe enquanto eu trabalho os 3 dias…[risos]… com a avó neste caso...

M- Muito bem…no seu caso a sua esposa ficou sozinha ou?

P1- Não, tenho uma senhora que vai há duas horas de manhã e uma à noite.

M- Teve que contratar uma pessoa para…

P1- Sim tive de contratar como é evidente…

M- Tive que contratar uma pessoa para…ir lá de manhã e à noite…

P1- …Ela tem um de subsidio, uma fortuna, de 105 euros por mês…

M- Epah que exagero…

P2- Muito dinheiro…

P1- Não dá para as fraldas…

P2- Não dá…

P1- Nem pensar nisso…

P2- Dá…dá para contratar não sei quantas pessoas [risos]…

P1- Deixe-me fazer aqui são parentes, não tem nada a ver com isto, é um caso político, quem quiser ser é como é normal, gasta-se tanto dinheiro mal gasto e não se arranjava pelo menos 1000€ para cada pessoa destas? Eu conheço casos que o marido está doente, o marido, ou a mãe ou o pai ou a mãe estão doentes e eu tenho um recado, tenho que deixar o que se passa nestes casos, alguns que aparecem outros não se sabe…tem que deixar a morrer para..para…Vive de quê? Uma reforma de 400€?

M- Ah, ah já agora…. Nós também estamos interessados aqui na vossa apreciação também sobre custos, mas no seu caso o seu irmão, neste momento está com a sua irmã ou?

P3- Não, ele está comigo…. É…

M- Não, hoje?...

P3- Com o meu irmão está com uma senhora que lá vai também de vez em quando…

M- Também contratam uma senhora para ajudar?

P3- Não, é uma senhora que vivia…era…já a tinha já há muitos anos e ajuda-me…

M- Ok, é quase família…Ok, mas já agora vamos pegar nisso que o P1 estava a dizer e vamos começar por aí…Se pensássemos no antes e no depois, quando há uma pessoa que fica mais…mais dependente pela doença, ah, como é que vocês vêm isto em termos de valor que compensaria ou que seria suficiente para poder cuidar com mais dignidade de mais conforto um familiar destes?

P3- Eu não sei…

P1- A minha resposta é radical…

M- Falou em 1000€…. Falou em 1000€…

P1- Uma espécie de ordenado?...Sim, 1000€…tá bem para nós termos uma vida normal…fraldas…

P2- Dá. Para cuidar dela…olha a minha mãe está a dormir, está deitada, está a ver?... [Mostra câmaras no telemóvel] …está deitadinha, está aqui com a televisão ligada [risos]…sossegadinha…

P3- Eu penso que para as despesas todas e ter uma certa dignidade, 1000€, 1200€. Agora para ter outras pessoas que ajudem, isso não…é muito mais do que isso.

M- Um bocadinho mais, entre 1000€ e 1200€ já daria algum conforto…

P2- Sim sim, já ajudava muito…

M- Então e como é que vocês viam esse dinheiro a ser aplicado, era para quê? Para contratar uma pessoa? Para medicamentos…era para quê?

P2- Principalmente [no momento em que foi referido “para contratar outra pessoa”] … Para mim principalmente…

P3- Esse dinheiro para mim era para o dia-a-dia, para a alimentação, das fraldas e dessas coisas todas, para ter uma certa dignidade, de resto seria talvez…

P1- Eu seria o essencial porque, eu sinto isso não é? Ando com uma certa ansiedade, vou ao Doutor A também, para a sempre…Quem está muito tempo com uma pessoa assim acaba por ficar igual…[concordância dos restantes elementos]…Eu temo um bocado isso, já tenho 75 anos…Eu seria para por uma pessoa permanente em casa porque 3 horas é pouco para arranjar a casa…Eu não falo só por mim, eu estou aqui com a finalidade à minha maneira que é não ver o caso da minha mulher é ver os casos de tantas pessoas que estão como ela…evitar o sofrimento a essas pessoas e aos cuidadores, eu sempre tive ideia disso…será isso? Eu já tive numa entrevista aqui com a menina CM, há um ano mais ou menos? Em janeiro…

CM- Já foi há uns mesinhos, não sei precisar…

P1- Acho que foi em Janeiro…hum… E é nesse sentido que eu estou aqui não pela minha mulher….

M- Mas para pensar no geral, não é?

P1- Tenho 3 filhas maravilhosas que estao felizmente todas muito bem…Agora posso, um à parte, a mais velha trabalha no (nome do banco), é engenheira informática, a do meio trabalha la na casa da moeda e a mais nova, é um génio, tem 30 anos e é professora na (instituição),  Doutora…Doutora mesmo, com 31 anos!

M- Parabéns!

P1- Que são pessoas maravilhosas mas não…não é o dinheiro que elas tenham ou não tenham…quer dizer, mesmo que queiram ajudar, a minha mulher teve doente e está doente, muito constipada, já disse aqui à menina CM, e eu tomei conta e tal…E eu, eu não disse nada às minhas filhas…Aguentei…perguntei à senhora que vai a minha casa e a (cuidadora formal) disse-me: “O quê? Se tiver assim, chamar o 112 que ela está mal” … Eles na (localização) sabem mais de medicina que nos aqui…lá são, têm cadeiras que com, logo na primária a aprenderem profissões e socorros básicos e a pessoa sabia que tava mal e era para isso basicamente…

M- No seu caso…ah…também 1000€, em que é que investia esse dinheiro?

P2- Sim!...Principalmente para ter alguém que lá fosse tratar dela para o banho…principalmente para o banho, que é o que mais me custa porque ela foge da água e grita que não quer o banho …Tanto que ela agora tem uma medicação reforçada para a acalmar de manhã, para quando eu a quero…pô-la pronta e lhe der banho… “vamos ao banho”, “Não quero, já me lavei, já tomei, mas porque tanto banho, para que tanto banho?”…É super higiénica, e é difícil, muito difícil…E depois as casas ainda não estão adequadas para…que a banheira é alta não é? Tenho de carregar com ela que a minha mãe é mais pesada que eu…[risos]…Tenho de carregar com ela para dentro da banheira e depois treme, e depois “aí aí que está quente”, “ai ai que está fria” e poe-me os cabelo brancos [risos]…mais essencialmente para isso…

M- hum hum… portanto

P1- Eu tinha o mesmo problema com a minha mulher, fiz um poliban agora, em minha casa, tenho duas casas de banho, fiz um poliban…ficou impecável…

P2- Pois é o ideal, mas a casa não é minha é alugada pela minha mãe…[risos]

M- Portanto, os 1000€ também tinham que dar para fazer algumas adaptações em casa.

P1- Eu acho que eu ouvi na televisão não sei se isso está ou não, já há muito tempo…que os cuidadores têm, as pessoas têm montes de direitos que nos não conhecemos…É num programa que há às segundas-feiras na…acho que é na TVI ou na 1 que diz: O consumi…, o direito do ….

M- Do cuidador…

P1- Nem sei se é bem essa palavra…Tem uns direitos, comprar fraldas é comprar, pagar e depois apresentar a conta…Eu gastei num poliban 1500€, arranjei-os eu com as minhas filhas claro, não vamos pedir esmola não é?…Porque a minha sorte é que elas podem também ajudar, porque há aqueles que não têm hipótese nenhuma…

M- Pois, depois há esse problema, às vezes…

P2- A casa não é minha, não me interessa ficar com a casa, a casa é alugada, portanto, é estar eu a fazer as obras, até poderei morrer primeiro que a minha mãe, não é? Não está em causa, a gente não sabe…, mas estar a fazer ali, em que não me ajudam nada, a parte, portanto, do senhorio…fazer isso gastar ali um dinheirão…

M- Muito bem, mas aqui o pro…, aqui a proposta do P1 é se houvesse apoio para fazer as obras seria diferente, não é?

P2- Ah! Lógico…

P1- Eu acho que há, informe-se…

P2- Pois…

P1- Tem de se informar que eu acho que há uma casa em (localização), só que isso divulgam as coisas muito metaforicamente, muito…Têm de ser claros! Em hora de ponta para as pessoas ouvirem!

P2- Não, porque quanto menos gastos melhor…não é?

P1- Exato, olhe que eu acho que é isso!...E então…

P2- A desinformação, quanto menos a gente souber melhor…

P1- A senhora compra o objeto e tem direito, a sua mãe tem dependencia? Tem, não tem, tá, foi a uma junta médica?

P2- Sim sim…

P1- E qual é a incapacidade que lhe deram?

P2- Oh, que a minha mãe não faz nada…

P1- A minha tem 80%...

P2- Sim a minha mãe não faz nada!

P1- 80% é muita fruta, está dependente de tudo!

P2- Tá, de tudo!...De tomar a medicação, a única coisa que a minha mãe ainda consegue fazer, graças a Deus é, sair do quarto dela e ir a casa de banho, mas faz asneiras, é o chichi no chão, é as coisas fora do sítio, pronto…Mas vai à casa de banho, é uma bexiga…pode sair, mas ainda tem noção que vai a casa de banho. Eu dizia: “Ó mãe agora vais lavar o rabinho.”, “Já lavei”, “Ó mãe então isto está seco, como é que tu te lavaste?”, “Já lavei, já te estou a dizer que lavei [a gritar]”. Pronto e se a gente a contraria, eleva a voz e grita [risos].

P1- Dois casos diferentes, da mesma doença!

P2- Grita, grita…E grita histericamente!...

P1- Quem diria…Pessoas mais diferentes!

P2- Histericamente…, portanto, e ela também foi operada como o seu irmão, essa introcefálica…Não é? Tem um tubo que faz a derivação à bexiga.

P3- Não, eu não sei isso…Não ele não tem…é qualquer coisa…eu não sei….

P2- É no líquido raquidiano…pois a minha mãe também perdeu o andar…

P3- O meu irmão tem uma consulta e o medico disse: “Olha o (nome do doente) é qualquer coisa…cirurgia vascular…”

P2- Pois a minha mãe perdeu o andar também e o médico aqui é que…

P3- No centro de saúde e o Doutor B disse-me assim: “Olhe, não, não o mande para o hospital…[risos]”

P3- mas o meu é…

P2- A minha mãe, foi graças a Deus, há 10 anos…10-12 anos mais ou menos foi operada aqui, pelo doutor…C?...

CM- Não sei…

P2- É lá do piso da Doutora D…

CM- Ah!

P2- Foi através daí que ela foi para a D.

M- E P3? Ah, no seu caso onde é que, portanto, basicamente seria para ter alguém para ajudar também ou mais alguma coisa?

P3- Não, por exemplo, eu agora fui operada, fui para a outra casa da minha irmã que está com hemodialise [risos], também, mas eu porque, porque de noite eu preciso de um certo sossego…

M- Muito bem!...

P3- Agora voltei outra vez…E eu pago à senhora que já lá ia…Não lhe pago muito bem, portanto, pago aquilo que posso e que ela… Até faço das tripas coração da minha reforma, ah…pronto, e não temos esses fundos…

P2- Mas as reformas são boas…

P3- São hã?

P2- …360€…, portanto são ótimas…

M- São boas, portanto, uma fortuna…

P2- A reforma da minha mãe, tem 30 e tal euros já há não sei quantos anos para ela.

P3- Não, mas o meu irmão tem, recebe 700€…

P2- Recebe 360€, é o que a minha mãe recebe…

M- Quanto tempo ao longo do dia, quanto tempo é que vocês têm dedicado ao cuidar de…dos vossos familiares? Isto implica o vosso tempo, portanto têm ajuda?…. Portanto, duas horas mais duas horas, não é?

P1- 3 horas, duas de manhã e uma à noite.

M- 3 horas…hum…. No seu caso, não tem, não é? Portanto, vai dividindo com o filho…

P2- Sim…

M- Mas isto estamos a falar de quê? Estamos a falar de…é quase 24 horas sob 24 horas? É…

P1- Eu tenho depois o centro de dia lá na Igreja de (localização), ali…

P2- E ela vai para o centro de dia?

P1- Está lá das duas e meia às cinco…

P2- Pois a minha mãe…

P1- Ela está-se a dar muito bem lá. Ela começou, não sei se foi a gripe ou se é doença, começou a vomitar água, mas acho que foi da gripe, isso não tem nada a ver. E depois eu reparo que há la mais mulheres, pessoas como ela, e são pessoas com 80 e tal anos, a mais nova é a minha com 73, outras têm 85, 89…. Há lá outra com 90 e tal…e são aquelas idades que coiso…

P2- A minha mãe diz que não é velha…

M- Ela diz que não é velha?

P1- …A (assistente do centro de dia) toma conta dela como ninguém, poem-nas a fazer nada…

P2- E grita se dizem que vai…[risos]

P1- …A (assistente do centro de dia) telefonou: “Ó senhor P1, venha aqui que não sei quê”, “Mas o que é que se passa?”, …Cheguei lá e as velhotas, duas... Por um lado, é a idade, por outro lado não há compreensão praticamente ou falta de cultura e falta humanidade ou então pode ser tudo…

P2- Oh…não se pode ter tudo, infelizmente…

P1- …. Porquê? Quando ela está bem, a (assistente do centro de dia) saí “ah e tal, tudo bem, porta-se muito bem a (nome do doente), ela é tao linda, e tal tá tudo bem” …, mas aconteceu aquele caso: “Aí senhor P1! Não pode ser assim”, quer dizer vem para aqui é para estar a descansar…E eu virei-me para ela assim, fiz assim: “Está bem”. Agora nem sei se vá lá pô-la ou não…. Estou a pensar no seguinte, para o mês que vem vou-me inscrever la, inscrevo-me…. Fico lá com ela… Se estiver bem vou dar uma voltinha, se tiver mal…fico lá eu a tomar conta dela…

P2- Se você tiver condições…[risos]

M- Fica lá…

CM- Mas o que está a querer dizer é que quando a sua esposa está mais agitada…é isso?

P1- Ela nunca está agitada, foi nesse caso que ela vomitou água!

P2- Que precisou de mais cuidados…

M- E isso é interessante…

CM- E aí telefonaram foi isso?

P1- Foi, a (assistente do centro de dia) ligou-me, porque as outras mulheres, quando eu cheguei, a (assistente do centro de dia) tinha de sair e por azar foi à quinta-feira que é quando a (assistente do centro de dia) tem o banco alimentar e depois ela é que distribuía os copos com ela…

M- E o que o P1 está a dizer é que eventualmente pode vir a estar mais tempo com ela, inscrevendo-se lá no centro de dia, não é? E depois se ela tiver mal, o P1 vai lá e está lá presencialmente…

P1- Neste momento sim, estar com ela de noite e de dia, permanentemente… Mesmo quando eu estou, estou mais cansado, eu não durmo totalmente, não é?

P2- Claro!

P1- Ela depois ressona muito, eu já experimentei deitá-la num quarto e eu noutro…Levantava-se de noite, ia abrir as torneiras, as luzes…

M- Posso fazer uma pergunta só para ficar mais claro na minha cabeça que é: como é que vocês estruturam o vosso, um dia típico vosso como é que é? Um dia típico como é que é? Acordam a que horas e como é que o dia, como é que se divide o dia ao longo do tempo…

P2- Se…. Isto é se ela acordar bem, não é? [risos] Se não…Não é um dia como hoje! [risos]

M- Pronto, mas como é que é um dia típico…

P2- [risos]…. Tive que a acordar logo de manhã para lhe dar o pequeno almoço e a medicação porque pelo contrário…

M- Portanto, é a P2 que a acorda é isso?

P2- Sim…Não, depende, depende das noites que ela passe…Se passar a noite agitada e de levanto e a acender a luz e “quero a televisão”, temos de desligar as coisas porque ela interage muito com a televisão, fala com a televisão, manda-os embora, que a casa é dela, roubam-lhe isto e roubam-lhe aquilo, “onde que está o meu comando?”, “foram vocês que roubaram!”, passa…

M- Ok, ok….

P2- Depois temos que lhe por desenhos animados, depois temos que por o preço certo que ela gosta de ver e a vida selvagem são as coisas em que ela acalma…e depois está e eu vou fazendo coisas…

M- Ok, são as coisas que a acalmam, mas a P2 acorda-a, isso significa o quê? Levantá-la? Dar-lhe banho de manhã?

P2- É difícil, dar-lhe banho é assim, eu queria-lhe dar banho para poder sair com ela todos os dias, mas aí eu tinha uma discussão sempre, constantemente com ela…

M- Ok…

P2 –…de gritar, eu sempre que lhe dou banho, eu fico completamente de rastos, porque é a nível emocional, porque ela grita muito, como se eu lhe estivesse a bater, muito mesmo…e eu digo: “Mãe, assim não da! Vais ver, eu vou deixar de tratar de ti, eu vou por aqui uma senhora que te vai dar banho!”, “Ah, dá-te banho a ti, vai-te mas é embora, eu tomo banho e não sei quê…” e grita, quer dizer eu para lhe dar banho, tanto quando eu vou às consultas da Doutora D para mim é a coisa pior…Eu não posso sair com ela para a rua sem lhe dar banho! Não dá! Não é? Pelo menos para ela se lavar e meter uma fralda lavada, não dá, porque ela não o faz e eu ter de fazer tem de ser dia de zanga, portanto de me zangar mesmo! De puxar por ela, não é, e ela a gritar e eu depois a convencê-la e às tantas já eu estou também...

CM- Já sabe que esses dias são muito complicados?

P2- Esses dias são mesmo dias muito complicados…

M- E depois o que é que acontece?...

P2- Se não lhe dou banho, portanto se não lhe der…

M- São mais calmos, são mais calmos…

P2- Exatamente, se não lhe der…

M- Portanto, ela levanta-se ou ajuda…como é que é? Só para também perceber o grau de…

P2- Ela se se levanta e anda por ali a andar e a vigiar, “O que é que andas a fazer, tens fome mãe?” ela levanta-se, “Sim tenho”, “então vá…vai lá que eu já te vou tratar…e há fruta…

M- Isso tudo antes do seu trabalho?

P2- Sim sim, sim, sim…

M- Portanto estamos a pensar quê? Entre as 7 horas e as 8 horas?

P2- Não, dou-lhe mais cedo, dou-lhe mais cedo… e ela essa, geralmente a hora já ela está…

M- E depois vai trabalhar aí com a sua camarazita também, não é? Vai espreitando quando pode, não é?

P2- Sim…quando é fica lá o meu filho, portanto quando eu vou trabalhar o meu filho está em casa… se…

M- Ok…

P2- Se é necessário ela chamar que é: “(neto) olha a televisão, (neto) quero não sei quê, (neto)”, ele vê-a alterada vai para ao pé dela, não é? “O que é que tu queres”, “Eu quero não sei quê”. Agora para sair de casa é muito difícil porque ela não quer sair, portanto eu para a levar a sair também tenho de lhe dar banho e é difícil! Para mim era meter alguém que lhe desse banho e eu aí sim pegava nela...

M- Ok…. É o principal problema, ok…

P2- Exatamente. Porque é difícil…

M- Mas pensando no seu dia, no seu dia-a-dia, o seu…o da P2, portanto, acorda, ajuda a mãe no pequeno almoço e tal…

P2- Faço os pequenos almoços de toda a gente…

M- Vai para o trabalho depois volta às cinco ou?

P2- Depois não, venho mais tarde, venho as 3 para almoçar…. Portanto…

M- Às 3 almoçar e aí ela já almoçou?

P2- Aí não, ela espera sempre. Portanto vai toda a gente para a mesa, para toda a gente comer, portanto o (companheiro) ajuda.

M- E ela é autónoma nisso? Almoça só…

P2- Não, não…. Ainda come, ainda come por ela…deixa cair, mas tudo bem…

M- Ainda come, ok…

P2- Não, tento que ela vá fazendo as coisas mesmo com a dificuldade que tem em cortar eu deixo-a fazer…só quando ela, às vezes…

M- Não consegue é que ajuda…

P2- …quando não consegue é que ajudo, caso contrário deixo-a fazer tudo…

M- Depois volta ao trabalho…

P2 –Volto ao trabalho até por volta das 8.

M- Chega lá para as cinco…oito? Oito. E depois?

P2- E depois, entretanto cuido dela outra vez, portanto tratar da medicação, antes ela tem de comer, dar-lhe o jantar…geralmente a gente não janta assim muito…ou é sopa e fruta, um pratito assim aquelas coisas mais [risos] e depois estamos ali um bocadinho, entretanto ela está a refilar porque não está a dar aquilo que ela quer…e…

M- Ok, ok…e depois ela vai deitar-se a que horas?

P2- Aí ela não… eu tenho a bicicleta na… e ela andava sempre muito na bicicleta, agora diz que não quer, que já andou ou então diz que está, “já andei” …” Mãe então anda vamos fazer quilómetros, vamos até ali…”. É como as criancinhas, tenho de a levar como as crianças, “vamos andar um bocadinho a ver se tu me ganhas”, “Vamos até ao (localização)”, portanto assim na brincadeira…Às vezes vai consoante o estado de animo dela, contrariamente quer estar sempre deitada, sempre deitada…

M- Ok, e por volta de que horas é que adormece?

P2- Não tem hora…

M- Não tem hora?

P2- Tanto pode adormecer às 11 da noite como pode ir noite dentro como foi este caso de hoje…

M- E, portanto, e a P2 vai vendo também a sua televisão, vai cuidando é isso?

P2- Sim vou vendo…o quarto dela fica ao pé do meu, a porta aberta…

M- Ok, a lida da casa e tal, ok…muito bem…ah, é parecido convosco?

P1- Muito muito, muito diferente… [risos…]

M- Ok, [risos]…. Então vamos ver o P1, como é que é o seu dia a dia, um dia típico?

P1- Típico ou atípico?

M- Típico. Um dia habitual…

P1- Porque é assim, vai a…ela deita-se à noite, começa…Vai a tal mulher que à pouco disse, uma hora à noite, muda-lhe a fralda que ela tem durante o dia, ela muda-lhe a fralda, dá-lhe banho, dá-lhe o jantar, à noite é só sopa e mete-a na cama, tudo bem.

M- E isso por volta de que horas?

P1- ah…cedo, muito cedo, oito, oito e meia…. Ela dorme muito, acho que faz bem…então, eu durmo com ela… Por volta das 7h30 ela começa-se a mexer…E o que é que acontece? É quando se urina toda e é uma loucura neste país grande que é as fraldas, não há fraldas que aguentem a urina que ela faz…

P2- Pois…

P1- Acumula muito e depois passa para o resguardo e depois há uma pequena, um género de toalha por cima, aquilo apanha a camisa de dormir…E ela fica toda ensopada…. Porque eu às 7h30 da manhã, aquilo arrefece, é incómodo! Levanto-me e vou tirá-la, vou mudar a fralda até chegar…outra vez, se não ensopa…Isto é o…, depois…Tá, e ia para a (centro de fisioterapia), neste caso é o adaptado para…uma ginástica adequada à idade dela…vou lá pô-la às 11 horas, ao meio dia depois vou lá buscá-la…à uma hora vai embora, a (cuidadora formal), ela faz o almoço, partir coisas pronto, um à parte…Tenho um genro que tem uma fábrica de comer, tive essa sorte, não é? Que vai lá levar todos os dias, é só meter no micro-ondas…é só deixar, batatas e tudo…

M- Ok…. Ok

P1- E dou-lhe de comer depois vou pô-la no centro de dias às duas e meia. Digo-lhe: “(nome do doente), queres ir passear?”, “Quero, contigo”, tem quer ser comigo!

P2- [risos]

P1- Está muito habituada…

M- Ok…

P1- Passear… “Queres ir dar uma volta?”, “Quero, uma volta”, que ela não se pronuncia quase nada, não se percebe…

P2- Aí, essa minha mãe para sair de casa!...[suspiros]

P1- Depois vou dar, vou descansar um bocado que de noite…Não basta só estar a ouvir…que eu ando com uma depressão em cima também, não sei se já reparam aqui. Se querem…estou a falar de repente perco o fio à metade…à meada e…dá para descansar de dia um bocadinho que de noite não durmo o suficiente, não durmo mais de quatro horas seguidas e depois estou quatro ou cinco horas sem dormir…

P2- Junte-se ao clube…[risos]

M- [Ok…]

P1- Agora o atípico, o atípico é o sábado, porque essa ucraniana só lá vai de segunda a sexta. No sábado, sábados e domingos…ao domingo ou vai as minhas filhas vão lá…, Mas as filhas não são como o marido, estão lá uma hora e não tomam tudo junto …Porquê? Porque pensam que é fácil e eu…omito…

M- Pensam que é?

P2- Fácil…

M- Ok…

P1- E eu…omito muita coisa, não sabem que elas não podem fazer mais que isso…. Elas não sabem nem metade do que é difícil…. Essas senhoras sabem como é difícil, não é?

P2- Sim…muito, muito difícil…

P1- Eu digo que é quase impossível para quem não tiver não tiver amor! Só com um grande amor é que aguenta certo tipo de coisas…

P2- Olhe um à parte…. Eu tenho a minha tia, que é irmã da minha mãe, tem 60 e…65? 66?.... É tem 68! Ela vive no andar de baixo e deu-me as chaves aqui…era quase início do ano porque eu pus as camaras para a poder controlar…Não sei o que é que mexeu lá na cabeça dela, deu-me as chaves que não ia mais tratar dela…Conclusão, podia ajudar-me, não é? Ela ia durante, a meio da manhã ia tomar um cafezinho, conversava um bocadinho com ela, o que era ótimo…à tarde ia-lhe levar outro cafezinho, que ela tinha, ela adora café, estava um bocadinho com ela…Deixou de fazer isso…

M- Ok…

P2- Porquê? Começou a ser muito difícil…

M- O desgaste, o desgaste…

P2- Exato…. Portanto é, é preciso ter amor, tem que haver…

P1- Sim…

P2- E no entanto: “Ah, a minha irmãzinha, a minha irmãzinha”…A minha irmãzinha toca-me a campainha: “olha toma, um bolo”, e eu as vezes assim: “Então não vais dar um beijo à tua irmã?”…Pronto!...É… e não faz nada, não faz nenhum…A minha tia está em casa e é uma dondoca…[risos]

P1- Eu tenho que há pessoas na rua… As pessoas na rua, as pessoas que conhecem no dia-a-dia, que em (localização) não há ninguém que não conheça, sou o único que anda, que tenho de a levar e andar em cima se não, se eu a largo ela vai por ali fora…Se aparecer um cigano, um ucraniano leva-a…por ai fora…

P2- Vai…. Pois!...

P1- …. Ela é uma criancinha de 3 anos, eu estou aqui com uma criança de 3 anos, com uma diferença, a criança de 3 anos tem 3 anos em tudo, física e moralmente, até agora, ela não…ela passa alguém em vai …que é o caso dela, e tenho que estar sempre com ela…

P2- As vezes eu digo assim graças a Deus que a mãe está dependente um bocado… [risos]

M- Mas ia dizer uma coisa muito interessante, uma criança de 3 anos tem 3 anos em tudo e uma com a idade da sua mãe, da sua esposa é, que idade é que ela tem agora?

P1- 73, vai fazer agora…

M- 73, não é criança em que aspetos?

P1- Não é criança porque ela é uma mulher…

P2- [risos]

M- Percebo, só pelo físico, só pelo físico…

P1- Fisicamente tem tudo como uma mulher como é evidente…

P2- Riem, fazem as coisas como uma criança…

P1- Mas depois não sabem utilizar, tem os braços como nós, mas não fala e essas coisas, mas depois não sabe utilizar isso…

P2- …. Esquecem…. Esquecem…

P1- …. Parece que não está lá e funciona…. A criança não, isso é um à parte que eu estou aqui a dizer que é um ponto de vista, mas eu tenho aprendido imenso com a minha mulher…Se eu fosse tirar agora, dar um curso, por exemplo, gratuito, a pagar não queria essa, gratuito e dado por pessoas como nós, porque só com grande experiência…As pessoas quando me encontram em (localização) e já me conhecem: “Então a sua senhora…”, sou reconhecido mas eu não conheço…“Então a sua senhora…”, “conhece-a de onde?”, “Então passa aqui todos os dias”…Sou o único que ando, mete a mão no braço aqui assim, [se não também se desequilibra?]…Eu conheci uma pessoa na (centro de fisioterapia) no outro dia, sabe que a (centro de fisioterapia)  é o Centro de Reabilitação de (localização), e um senhor “então o senhor, como é que vai a sua mulher”- chorou “Eu sei o que é isto, o meu pai morreu assim, você anda a sofrer muito não anda?, “Ando…”

P2- Infelizmente é o dia a dia…. É o que se passa pela rua, diariamente…

P1- …E estava lá uma mulher logo ao lado, são coisas que se nunca mudarem eu não sei…, “Então e o senhor aguenta isso?”, e eu “Sim, minha senhora, porquê? Está espantada por eu aguentar isto? Se fosse a senhora não aguentava?”, “hein”, “Então olhe a senhora só tem e pulmão e carcaça…por dentro não tem nada”, disse bem ou não disse? Se as pessoas são assim não são humanas pá! Então é descartá-las, deito-as fora?

P2- Vocês sabem o que é que a minha mãe fazia antes de…portanto ela teve, teve vários pequenos AVCs (Acidentes Vasculares Cerebrais) que a apagaram quando ela fez a… a ressonância, teve muitos e foi apagando cada vez mais…Então, isto a minha mãe ainda andava na rua, ainda fazia, e a médica, a Doutora D disse: “Tire-lhe o cartão”, isto há uns 6 anos mais ou menos, que a Doutora disse “Tire-lhe o cartão, não há deixe andar com o cartão”…Mas custava-me que a minha mãe ainda vinha para a rua, aquilo era dela…o dinheiro era dela…

M- O cartão de….

P2- O cartão multibanco…

M- Multibanco….

P2-…A minha mãe sempre foi muito consumista, portanto ela comprava malas praticamente todos os dias, ténis, assim…E a médica, eu depois mostrava, e a médica “Tire-lhe”, mas eu custava-me. Há um dia em que, isto aqui há uns 5 anos atras, chego a casa, o que é que tinha acontecido, a minha mãe estava na farmácia, que ela ainda ia à farmácia buscar a medicação dela, está um sujeito atrás dela, e nessa a minha mãe já não estava bem logicamente, já tinha, portanto ela contava já histórias do arco da velha, só conhecendo é que se sabia que aquilo não era verdadeiro, não é? Já começava a misturar assim as coisas mas pronto, ainda ia fazendo as coisinhas dela…Estava na farmácia, um senhor diz-lhe assim. “Olhe, eu consigo-lhe medicamentos mais baratos, não sei quê, não sei quê, não sei que mais…”, uma grande história, conclusão, a minha mãe leva o homem la a casa…O homem: “ah, vais buscar as receitas que lá tinha” e dá as receitas todas ao homem: “Ah, agora preciso do dinheiro”, portanto isto, vai lá a baixo ao multibanco, e senhor do multibanco realmente viu lá a minha mãe, viu o senhor…Conclusão, ela tira 100€ da conta, dá-lhe os 100€ ao homem, só que, e já estava bastante, já estava…a culpa foi minha naquela altura, ele tira-lhe o cartão sem ela perceber não é? Tira-lhe o cartão, não sei como é que foi, já não me recordo, chego a casa e tinha na caixa do correio tinha uma carta do homem, mal escrita, analfabeto, portanto que deixou-lhe lá, ah, porque tinha posto o nome completo da minha mãe, aquelas coisas tudo mal escrito então eu apanhei…Teve o bom senso, pôs lá as receitas, mas ficou com o cartão…Portanto, um homem do banco presenciou estas coisas que eu estou a dizer, cancelou o cartão mas ele já lhe tinha levantado o dinheiro do banco…

M- Portanto, é fácil, é fácil enganar…uma pessoa assim…

P2- Exatamente, muito fácil…. Era muito fácil de enganar a minha mãe na altura e depois também…

M- Ok, que também é um custo, não é? Ou seja, o que nós aqui estamos também a pensar em termos de custos, não é? Estas pequenas aventuras em que são enganados acabam por ter custos depois para a família, não é?

P2- Então vou-lhe contar mais outra da minha mãe, porque a minha mãe embarcava em tudo, portanto, estava de tal maneira…Enquanto que ela muito agarrada, na altura deixou com o tempo, a cabecita dela já não estava bem só que eu deixei que ela ainda fosse independente…Há uma altura em que eu estou doente, com a depressão, isto à cinco anos atrás quando tive a minha última depressão, eu já tive cinco, estava de cama e a minha mãe vinha à rua não é? Sempre, às 7h30 tomava o seu banhinho, vinha para a rua, por volta da uma e tal vinha para casa, há uma altura em que chega a casa nessa manha e eu assim: “Onde é que vais mãe?”, “Ah, telefonaram-me para fazer isto não sei quê…não sei quê, eu vou lá”, e eu disse assim: “Mas vais fazer o quê?”, “Ah, é por causa de massagens, por causa de massagens” e eu disse assim para a minha mãe: “então olha se fores deixas aqui o cartão multibanco e o BI, o….”…

M- Cartão de cidadão…

P2- Cartão de cidadão…E ela: “Está bem”, assim fez e foi, deram-lhe a volta e ela passado um bocado estava em casa outra vez para ir buscar o cartão e não sei que e eu, de cama não me podia levantar: “O que é que foi?”, e ela “Não sei quê…”, e eu “ah, o mãe não vás” e ela “Mas eu não sei quê, que aquilo é umas massagens”…Conclusão, foi, quando veio trazia então um papel assinado com a idade dela e uma anuidade de um ano e meio a pagar 65€ por mês…E eu assim: “Então mas isto é um disparate! Tu com a tua idade…não sei quê…”, pronto aquelas coisas assim… Telefono para lá, deitada, telefono: “Aconteceu isto assim assim, a minha mãe não tem cabecinha já para tratar destas coisas sozinha, eu estou doente, não me consigo levantar, portanto eu gostava que vocês anulassem este contrato assim assim…”, “Ah fique descansada” e eu fiquei descansada. Com a, tirei-lhe o cartão e eu de vez em quando ia ao multibanco mas não tinha reparado, se calhar nos dias em que aquilo saia, conclusão andaram quase um ano a tirarem-lhe 65€ por mês no cartão, fui falar lá com o do banco o senhor, o gerente e ele foi ver: “Ah isto é não sei quê, isto é do Porto…” um coisa qualquer no Porto…e eu assim: “Então foi engano”…Porquê, eu comecei a ver, era 65 sempre, está a ver? Quando eu comecei a ir pedir o extrato era sempre 65 e eu assim: “Então aconteceu isto assim assim…” Anularam, portanto eles fizeram aquela anulação, portanto foi quando eu depois comecei a cortar, cortar, cortar…[risos]…

M- Ok, ainda não ou o seu…

P3- O meu dia…

M- O seu dia a dia como é que é? O seu dia a dia…

P3- Eu é assim, a noite, ele deita-se das onze, onze e qualquer coisa, está sempre presente…eu às vezes gosto de estar um bocadinho sozinha, mas, hoje em dia é impossível…

M- Ah, portanto a P2 é que gostava, mas…

P3- Eu, eu!

M- Aí, desculpe, a P3 gostava de estar um pouco sozinha e não consegue…

P3- As vezes prefiro estar, mas não consigo, à noite…

M- Portanto esta sempre com ele?

P3- A minha irmã também toma medicação para se deitar mais cedo porque ela precisa, o que acontece é que ele por volta das 4h abre-me a porta, fecha-me a porta e se eu estou no meu quarto…abre…

M- 4 horas da manhã?

P3- Da manhã…seis, sete, cinco, pronto…E eu a maior parte fico quietinha [risos], portanto para não haver novidade, mas eu às vezes fico assim a pensar, quer dizer, é muito difícil, pronto, isto é o horário, depois eu por volta das 7h30…

M- Mas é muito difícil o que? O que é que é?

P3- Eu já vou dizer, ah eu não me esqueço, por volta das 7, 7 e tal pronto ele levanta-se e eu vejo que ele está todo molhado, só tem ido duas vezes por semana a senhora dar-lhe banho porque não consegue e eu também não estou agora, eu não posso fazer esse trabalho…

M- É a mesma senhora, é a mesma senhora que faz a limpeza? Ou é outra senhora que lhe dá banho?

P3- Não, é da Junta…

M- É da Junta…

P2- É o apoio domiciliário…

P3-Sim…da Paroquia de (localização), duas vezes por semana porque era sempre uma tourada, pronto…

M- Também não quer, não quer tomar banho?

P2- Tornam-se porcos, a maioria tornam-se porcos…

P3- Toma, mudo-o, mudo-o, toma o pequeno-almoço e eu faço a minha vida, ou vou fazer as compras, faço o almoço, arranjo as coisas até, ele fica nessa altura um bocado sozinho mas ele dormita, fica a dormitar…Depois à tarde, nos dias em que a minha irmã não tem, uma delas vem à tarde, ela espevita-o…Cerebralmente, espevita-o com conversa não sei quê, e a gente às vezes zanga-se um bocadinho mas isso as vezes ate é bom porque acho, quando vou, já tenho ido assim a lares e penso assim: “isto é melhor a gente irritar-se com ele do que ele estar aqui…” Pronto, é verdade isto, francamente é o que eu penso…Ah, depois tem...o que eu ia a dizer à bocado é difícil o que eu sinto e ia dizer, é, custa-me aceitar uma certa maneira de ser dele, quando eu sabia que ele não era assim…

P2- [risos]

P3- Portanto, eu com crianças aceito, com esta idade tenho muita dificuldade, enervo-me muito, eu tenho 82 anos e estou…

P2- Cansada também…

M- Cansada…hum hum…

P3- Cansada, porque o meu pai também já foi assim, mas o meu pai tinha o meu irmão e a outra minha irmã estava…era diferente…

M- O pai, o pai também teve uma demência? Ou outro tipo de situação?

P3- Não, teve…foi amputado, as pernas e foi muito difícil, teve um cancro e teve AVCs e uma coisa de respiração…

M- Ok ok …

P3- Portanto eu nessa altura trabalhava…

M- Mas custa-lhe aceitar, custa-lhe aceitar a mudança, a maneira de ser dele…

P3- A maneira de ser dele…A maneira…Eu acho que as vezes percebo que ele tem, porque ele, por exemplo agora que soube que eu fui operada e não estive, ele tem um certo cuidador, ele tem cuidado de não me acordar, mas hoje por exemplo, já me acordou, mas tem uma certo cuidado em não me acordar, tem um certo respeito…

M- Hum hum…

P3- Mas de vez em quando passa tudo…E eu passo tudo…

P2- De vez em quando eles têm, eu acho que eles devem ter, de vez em quando, um bocadinho de noção [risos]…Não é?

P3- Não, e o meu irmão tem, de vez em quando tem noção…cada vez menos…

P2- De vez em quando tem, porque a minha mãe hoje também hoje durante a noite ligou a televisão e começou a falar lá alto com a televisão, acendeu a televisão, eu já a tinha desligado, acendeu a televisão…e eu levantei-me e disse assim: “Então mãe, vai-te lá deitar, vais agora…”, “Mas eu não fiz barulho”…Não mãe, não fizeste mas acordaste-me”, “Mas não fiz barulho!”, “pois não, mas acordaste-me mãe, agora vais-te…”, “não mas eu quero a televisão” e eu disse assim: “Não queres a televisão que já é tardíssimo, não vais estar com a televisão acesa…” E ela pronto, de vez em quando tem assim umas, mas é raro…é um desgaste grande…

P3- Ele de vez quando, ele esta noite fez barulho e eu fui lá e ele: “Aí ainda bem que apareceste porque eu já estava a morrer!” [risos]…” Calma, que não se morre assim…[risos]…

P2- “Onde é que eu estou?”, “Onde é que eu estou?”, “Onde é que eu estou?”, de vez quando perdem a noção complemente…não é? É um drama…

P3- Mas o que é certo é que sei que se estivesse, se eu, eu fui educadora, e era capaz de controlar as coisas, e de…. Ver crescer é uma coisa…. Ver o contrário …regredir é outra…

P2- Regredir é outra [risos], então, não é? Triste…triste…

P3- Não tem nada a ver…[risos]

P2- A gente, não é? Fica alegre com um toque aqui e é só vagamente!...

M- Aqui é um decrescer diria assim? É um decrescer?

P3- É um decrescer… é… literalmente…

P2- Estão a morrer aos poucos…

M- Eu, no seu caso é diferente, não é? Ela, a sua esposa continua amiguinha, não é? Que foi uma palavra que usou…mudou… notou mais diferenças em termos de personalidade, em termos de maneira de ser dela?

P1- Eu diria que ela hoje não tem personalidade nenhuma… É um ser morto… Só…. Se lhe perguntar assim: “De que cor é este copo?” Diz: “De que cor é este copo”, repete o que a gente diz, mas não faz nada…Há aqui uma coisa que é a repetição, se tem alguma coisa a ver ou não, deixo isto como uma pergunta. Eu tive 47 anos e tinha 4 sapatarias, eu era mais na parte executiva, mas ela estava numa sapataria e era muito paciente com os clientes, não se sabem que vender sapatos é muito difícil…

P2- Se é!...os sapatos não gostam de mim…. Ou eu é que não gosto deles…[risos]

P1- E que demora, então quando é os velhinhos, com joanetes e queriam uns sapatos que não lhes fizessem doer e ela era muito boa, sacrificava-se e ficava ali uma hora ou duas e depois não levavam nada, mas ela: “Muito obrigado, minha senhora”. Agora um exemplo, há uma hora [não se percebe], chegava lá uma a dizer que se passar um bocadinho sentada no sofá e…: “Ai ver a…”, se ela estava lá, nem sei…“Ai! São cá clientes, não sei que mais, ó (nome do participante)!”, “Deixa lá as senhoras não precisam de sapatos…”, às vezes até levavam, mas isto era verdade, mas outras não…Ou seja, ela é o expoente máximo de mim, muito paciente, o cliente tinha sempre razão, há aquele ditado que diz, não é? Que é uma mentira…O cliente tem razão quando tem, quando não tem, não tem! Tanto me faz ser cliente é o que tem de ser…não sei se isso tem a ver com a doença dela, uma vez que ela não tinha ninguém na família que tivesse, que se conheça, essa doença. Houve um tio dela que morreu, que era pouco mais velho do que ela, morreu foi, pensávamos que era isso…. Foram fazer exames, ao toque do Doutor A, não morreu de nada disso, era um…um tumor na cabeça. Porque ele morreu, com um tumor na cabeça que não tem nada a ver com demências, mas afeta o cérebro…

P2- Isto é um computador que aqui temos dentro, se não trabalha bem…se não trabalha de uma maneira vai ver de outras, [risos] isto é um computadorzinho…. Isto não está um quarto estudado…

P1- E até pensava que fosse imitar essa doença, mas não...[tosse]…. Já estou…

CM- E o P1 também já está constipado…

P1- Não, já me está a passar, está a descarregar tudo, estou…estou um bocado…Ela também teve e está…

P2- Mas olhem que eu acho que a demência tem vários aspetos, várias várias caras…

P1- Não aqui já se mostrou que é isso…

M- E diferentes, não é?

P2- É…várias, a minha mãe sempre foi: “Quero, posso e mando” e era muito agressiva e hoje está-se a revelar pior ainda…O que ela tinha de mau, acho que vem tudo ao de cima a dobrar, a dobrar a triplicar, é terrível! Por isso ninguém tem paciência com a minha mãe…Eu tenho um irmão, que vive a 5 minutos da minha casa, eu falei com o meu irmão há dois meses nos anos e depois lembrei-me já era noite, pronto já eram 11 e tal, mas ainda estava dentro da hora…Liguei-lhe de manhã e ele ainda não me atendeu, até hoje não me voltou a telefonar para ver se a mãe estava melhor, se estava…Quer dizer passa anos, e está a cinco minutos e é: “Eu não tenho paciência!” Porque a minha mãe é terrível, era… não é? E agora com esta doença ainda pior…. Quer dizer, já esqueceu o filho também, eu pô-lo através do Skype para ver o filho há dois meses, “Quem é esse, quem é esse?” …Pronto…

M- Isto obviamente é muito exigente, muitíssimo exigente, não é? Nem consigo imaginar… Nem consigo imaginar o nível de exigência e o….

P2- É exigente…é triste…é tristeza, é tristeza…

M- …O desgaste, não é? Como é que vocês tomam conta de vocês, ou seja, quais são os vossos momentos? O que é que fazem?

P3- O que é os meus… [risos]…meus momentos, olhe assim que eu tenho gosto de ir a conferências e coisas assim desse género, gosto de ler, mas agora não posso [risos…] … É o que eu faço assim mais…

M- Ok

P3- Amizades eu tenho perdido, não é tenho perdido, afasto-me um bocadinho…não há tempo…pois…

P2- Não há tempo!

M- Não há tempo, não há tempo…

P3- Mas pronto, eu se pudesse ainda fazia qualquer coisa…estive a fazer já depois de aposentada, estive a fazer um voluntariado em SOS com umas amigas e também era puxado pronto, mas essas coisas aguento, a gente vai e faz…

P2- É triste porque somos nós que estamos a cuidar, estamos a vê-los no dia a dia, a perder tudo, dignidade…tudo…e isso mexe tudo com o nosso…

P3- Não é bom…

M- Como é que toma conta de si? O que é que faz por si?

P2- Eu como ainda trabalho os 3 dias os outros 3 dias que estou em casa, tento orientar tudo, não é? É lavar, é passar, é fazer pronto…Tenho que organizar as coisas, o meu tempo extra, não tenho muito…Portanto, eu tirei, foi uma tarde na semana passada, minto, a manhã, com a minha tia queria ir fazer uma troca não sei quê e eu disse assim: “mas eu não tenho vida para isto, eu estou cansada” [risos]…Canso-me porque é o dia todo de pé, em minha casa, de pé também…Quer dizer, chega a um ponto que também…Portanto, a minha vida extra casa e extra trabalho não é assim muita…

M- Não é muita…

P3- O meu irmão aguenta um bocado, estar sozinho um bocado…isso… e eu saio, às vezes vou, eu tenho necessidade logo de manhã de sair [risos]

M- Sair um bocadinho?

P3- Sair um bocadinho…

M- Beber o seu cafezinho ou …

P3–Se não, bem bonda os desgostos….

P2- Aí eu agora sim, há um mês para cá. Já fui duas vezes, à noite com amigas e não sei quê a um jantar…Jantar de anos, não sei quê, que fez a semana passada, vamos…Uma vez por mês, exatamente…à noite, tenho é de ver se conto com o meu filho porque o (nome do companheiro) que é o meu companheiro, também o faz, mas com o meu filho estou mais à vontade, se houver alguma coisa toma conta da avó…Embora o (nome do companheiro) tenha mais paciência, mais calma para a minha mãe…

M-Do que o seu filho?

P2- Do que o meu filho, custa-lhe muito aceitar a doença da avó…

M- No seu caso?...

P1- Eu como, está a perguntar no meu dia a dia, como um hobbie? Se tenho algum hobbie é isso?

M- É…

P1- É tipo um hobbie que tenho que é o acordéon, eu tenho um acordéon

M- Acordéon? Uau!

P1- Eu fui operado aqui neste hospital do Doutor A…

M- E ainda consegue? Depois da operação?

P1- Sim…Toco, quer dizer, são, eu aqui há coisa de um ano atrás, tocava acordéon e ela começava a dançar atrás de mim…

M- Ela.... Hum-hum…

P1- Eu estava na sala, quer dizer, estava a tocar e ela estava a dançar ao pé mim, hoje já não faz isso…

P2- Perdeu tudo, coitadinha…

M- Mas continua a tocar?

P1- Toco, para não esquecer que aquilo é muito difícil… Eu já toquei bem, agora não toco nada de jeito, sabe como é tenho de dar lá uma volta…e de resto mais nada, a minha vida…

P2- Tudo…

P1- …ou seja, a minha vida é viver um dia de cada vez, um dia… porque não tenho gosto em viver, eu já disse à minha filha, à mais nova, a que é professora, disse-lhe olha eu, a conversar, eu sou uma pessoa que conto tudo, estão a fazer perguntas ou queres algo… eu deito tudo cá para fora, não fica nada escondido, o que sair vai ter de sair…

P2 –Não tem gosto em viver?

P1- Deixe-me explicar, eu disse, se eu morresse agora não tinha na minha vida, interesse em ficar…quer dizer, estou um bocadinho…

P2- Está com depressão, está com depressão, se o pensa assim…

P1- …E disse assim…. Quer dizer pai? Então não gosta de viver? Não, não é que eu não goste de viver, mas eu não viv…é a realidade, não é?

M- Os seus dias são todos iguais…não é?

P1- Isto é vida? Vida é se eu estivesse bem, íamos dar uma voltinha e pronto, nem que fosse só ir dar uma voltinha, beber um cafezinho…

P2- Sim, mas a gente tem de ir passeando…

P1- Ela agora quando está a comer faz assim, come só com uma mão, a direita não é esta mão poe em cima da comida e ia tomar café a uma parte em (localização) e ela cospia para dentro do copo, imagine o que eu já sofri por causa dela, ter de pedir desculpa às pessoas…

M- A P3 ia dizer qualquer coisa…

P3- Eu ainda faço, duas vezes por semana, ginástica…

M- Ginástica… ok…

P3- E faz muito bem, agora…isso faço…

P2- Que bom, maravilha, faz muito bem, é ótimo…

M- ok

P2- O meu exercício é um bocadinho menos [do que ginástica…. É a cabeça…[risos]

P3- A minha irmã quando está em casa ajuda-me, às vezes, nesses bocadinhos, agora ajudou mais quando eu fui operada e pronto é assim…

M- Ok ok, em termos de…a P3 referiu o aspeto importante que é os amigos, não é? Deixa de ter tanta relação com os amigos, não é?

P3- Pois eu levava gente, mesmo os sobrinhos, eu gostava sempre que viessem os miúdos, mas hoje estou impossibilitada de ter crianças em casa, praticamente…mesmo os mais velhos e isso faz-me mal, dá-me trabalho, cansa-me, mas fico bem, agora não!…

M- Não vê mais pessoas, não está com mais pessoas…

P3-Sim, e os meus sobrinhos também têm a sua vida, as minhas netas vão…

M- O P1 também sente isso? Que perdeu relações que…de amigos…desde…

P1- Eu não. Os amigos que tinha são os que tenho, muitos conhecimentos que eu tinha, centenas de fornecedores, clientes que encontro, às vezes não os conheço, que estão diferentes também fisicamente, e eu não tenho muita memória, não fixo as pessoas… estas pessoas que vieram… Se eu vir amanhã, não as conheço…A memória perdi…o que eu ia dizer mais que eu estou aqui…?

M- Ah, era isso, era as relações com…as amizades…

P2- Os amigos…

P1- Não vale a pena…

M- Mas tem menos tempo para estar com eles, não é? Esta mais em casa, não é?

P1- E também não é, quer dizer, não tenho paciência para estar…

M- Não tem paciência…

P1- …. Eu estou a conversar um bocado, saturo-me…. Lá no prédio somos 16, aquela gente toda, no meu prédio já, um já morreu, outro que era Parkinson, que também e difícil, tem a cabecinha certinha mas andam com passinhos, passinhos…

M- Sim sim, sim…

P1- Um dia no passeio de peões, ia mais a (nome do doente) pelo braço, e o homem ia assim, e eu disse: “Epá, você vai cair! Quer ajuda?”, “Se faz favor…” …Tomou um café em frente…tem lá vários…

P2- As amizades também já estão em idade para terem as coisas todas deles…

P3- Os meus amigos também não estão

P2- Eu ainda não, eu tenho gente jovem, eu é que já não tenho paciência…

P3- Mas também são uns quatro ou cinco…

P1- ……É tal história que mexe comigo, ele está sozinho em casa, ele estava sozinho em casa, não, esqueceu-se de fechar a porta, e eu saí para a rua, ah…não dá…eu saí cá para fora e fiz, fiquei a olhar, chamei à porta, não fechava a porta por esquecimento…imagine, diz-me que tem de ir trabalhar e deixava as chaves la em casa!...Aí está o que eu disse à bocado, está aqui uma grande lacuna e um grande defeito neste país, não darem um apoio a esta gente…

P2- Não há qualidade de vida mesmo…

M- Pois! Já agora, no seu caso, que…como é que com os amigos, referiu que ainda consegue de vez em quando sair, escapar-se um pouco…

P2- Agora, desde…, mas com dificuldade, não é para deixar a minha mãe, tenho de organizar as coisas…

M- Tem de ser ver muito bem, não é?

P2-Exatamente.

M- Mas consegue manter as amizades como é que isso é?

P2-Sim…sim…só que eu já não tenho paciência…

M- Ok ok…

P2- Eu vou, eu vou porque acho que me faz bem, mas não vou com vontade de ir…está a ver? Aquela vontade…Ah vou, não sei quê, aquele bocadinho do jantar, de ouvir música, e estar…Não vou, eu vou porque me faz bem…

P1- Isso já não é ir… isso já não é ir…

M- Posso perguntar-lhe, esqueci-me de perguntar, posso perguntar-lhe a idade?

P2- 65…

P1- 65?

M- Não parece, não parece de todo, está muito bem conservada, 65…

P2- Pois…Mas…

M- Tem 82, não é? E tem 80?...

P1- 75

M- 75 desculpe!

CM- Eu fiz uma bolinha na idade da P2, precisamente para confirmar…

P1- Não parece, está em forma…

P2- Fiz 65 este mês

P1- 6? 5?

P2- 65

P1- Então está muito nova, 65 anos…

P2- Pois, estou nova…

M- Está, não esta?

P1- A minha mulher passou por 68…

P2- Pois não!..., mas eu não quero [risos], eu tomei muita medicação para a depressão, continuo a tomar, agora…

M- Agora é, não é? Para conservar…

P2- Agora é para conservar e não deixar ir abaixo!

P1- Eu vou dizer que esses casos…. Ouvi falar que isso já havia remédio, que há cura se for apanho precocemente…

M- O quê? O quê?

P1- Eu já ouvi falar nisto, não sei quem…E se soubesse também não dizia [risos], mas que é, desde que a pessoa reconheça cedo os sintomas logo de início, se calhar é melhor fazer um TAC à cabeça, se acusar isso há medicação para atacar logo, estabilizou…e tem uma vida normal…

M- Hum… ah… hum, não tenho esse conhecimento…Não tenho…

P2- Isto é um computador muito complexo, o que é para uns não é para os outros e…

M- Deixem-me, posso abordar um aspeto mais delicado, que é dinheiro?

P2- Dinheiro, ok!...vamos lá…

M- Aqui a CM, uma parte importante dos trabalhos dela é tentar demonstrar ao estado que se gasta muito dinheiro, não é? Gasta…com isto…E que os cuidadores se privam muito de dinheiro para poder, para poder fazer o trabalho de cuidador, não é? Que é um trabalho muito exigente com isto que já falámos…onde é que vocês, como é que vocês vêm em termos de custos? Quais são as grandes fontes de custos ou de gastos nos cuidados?

P1- Eu, se não tivesse, e estou muito consciente disso, para ficar escrito, tenho um genro como disse que tem uma fábrica de comer, tem vinte e tal empregados e dá-me o comer porque se eu tivesse de comprar o comer com uma reforma são 450€, que era comerciante, a gente não quer descontar…e tal…era outra altura da vida também e então, passando à frente…Se ele não me dessemo comer, eu não conseguia comer ou não tinha lá aquela uma mulher a pagar 500€ por mês, 3 horas por dia, são 7,50€ por hora, dá 120€ semana, uma coisa assim...Não podia!!

M- Ok ok …

P1- E a (nome do doente) tinha de estar abandonada, que isto…

P2- E agora vão-me dar dinheiro a mim, não é? Vão-me dar dinheiro? Quando eu contar a minha história vocês dão-me dinheiro…[risos]

M- Ah ah …não é prometido, não é prometido…, mas estou curioso [risos]

P1- Há milhares de situações por aí fora como a nossa…

M- Portanto, o maior encargo é com essa senhora que lá vai aquelas…

P1- São 500…480€ por mês!

M- E tem a sorte de ter o….

P1- A alimentação…

M- E depois também, tem alguém que ajudo ao apoio domiciliário que vá de vez em quando lá a casa?

P1- Não, mas eu tenho esse direito, a Doutora E lá, lá na Igreja, é a Doutora F e a Doutora E, já me disse: “Ó (nome do participante), se precisar, é só dizer…”, vão lá a casa duas horas por dia ou o que é, para lhe dar banho e não quê…Isso não a ajuda?

P2- Ah, mas eu já tentei tudo, se ela deixasse, alguém dar-lhe banho….

P1- Eu tenho um neto, lá à noite, das 8 às 9h, dá-lhe banho e eu não preciso dessa ajuda, não é? Se ele vier ajudar, vem com boa intenção isso é muito importante…, mas no aspeto prático não tem segurança…

M- Ok, então e as fraldas e essas coisas?

P1- Sabe, peço desculpa, as fraldas é porque há as fraldas que são muito curtas, depende também do metabolismo de cada pessoa…. Que acumula muita urina, então tenho de lhe meter a fralda e depois uma fralda-cueca por fora, para segurar aquela. Porque as fraldas têm uns adesivos, eu não sabia disto, uns adesivos, e ela faz isto, e descola…

M- Descola…

P1- Portanto, tem uma fralda mais a cueca, três vezes por dia, que é de manhã, ao meio dia/meio da tarde e à noite e depois mais os toalhetes que também têm de comprar, estamos a falar por baixo…

M- Estamos a falar de muito dinheiro nisso, não estamos?

P1- Muito! E depois mais os toalhetes que ela, a higiene tem de ser mais, mais que as fraldas!

M- Quanto é que gasta por mês nessa, nesta parte mais da higiene?

P1- Em tudo e remédios, eu também tomo remédios…

M- Sim…

P1- Para o colesterol, e tomo quatro medicações que eu já disse à menina CM, quatro! Que ela começou a tomar por causa da doença, e a trazadona é para acalmar…

M- Tem ideia do custo geral?

P1- O custo geral…30€ por mês, 30 a 40€…

M- As fraldas?

P2- Os genéricos? Os genéricos?

P1- Não! As fraldas então, as fraldas, posso por seguramente, ou seja, fraldas e medicamentos 100€…à vontade, eu não quero exagerar…

M- As duas, ok…Não, não parece nada exagerado!...

P2- Não não, antes pelo contrário!

M- Eu não sei o preço, se pensar nos preços que gastava nas fraldas do meu bebé…

P2- Não não, é assim…é medicação genérica, se não for genérica é muito dinheiro! Eu tive que ir para os genéricos!...infelizmente!...

P1- …quem compra é essa outra minha filha, que ela tem uma carrinha que ela vai ao continente e compra quando estão em promoção, que é mais barato!

P2- Ah sim, eu também vou sempre aos saldos, é como eu digo, só saldos!...

P1- Portanto, a minha despesa como é diretamente extra, fora a medicação, não vou deixar para pagar a alimentação, isso são outros casos concretos da minha imaginação…

M- Não tinha hipótese…

P1- Portanto, o apoio que tenho de família ou não, é concreto, o gasto extra são à volta de 50...75€ por mês…há pagamentos pequenos, que é o caso da Igreja, que não conta, que é de borla, é de borla, 7€ por mês…

M- A igreja?

P2- É o centro de dia…

P1- É o centro social, que não é gratuito, infelizmente ainda há pessoas que acham caro, sabia?…. Há pessoas que acham que é muito caro, 7€ por mês… sabe que há pessoas com muitas dificuldades…

P2- Pois coitados, com tanto que têm para pagar…

P3- Eu por exemplo acho que, a higiene gasta-se, não sei mais ou menos quanto eu gasto, não sei, mas sei é que o meu irmão come muito bem, mesmo muito bem e eu isso nunca cortei, portanto, não chega para o dele e pronto, vai à frente aquilo que se pode. A senhora peço muitas vezes que me vá lá ajudar, porque eu também tenho que sair, ou tenho qualquer coisa, portanto…E as vezes tenho que dormir de dia, pronto, isso peço…. É o que eu…. Agora, na eletricidade gasto muito porque é todos os dias duas máquinas de roupa…

M- Duas máquinas, pois…é um aspeto que o P1 não estava a pensar nisto, mas concorda, não é?

P3- O meu irmão não…

M- Portanto gasta-se muito com a limpeza?

P1- Sim, é todos os dias um ou duas máquinas de roupa…

P3- Sim, porque por exemplo, se isso imagine a (amiga que ajuda em tarefas) quando vai faz-me a cama, tira-me aquilo tudo, senão sem a…e a…não é só, é o cobertor, é tudo, porque o meu irmão não se quer mudar à noite! É difícil…E as fraldas é um castigo para pôr, porque aquilo é de senhora, não põe, não toma, não quer! E de maneira que é, ainda hoje por exemplo, é um banho de chichi que não é chichi, que ele diz que não é chichi é outras coisas, pronto, isso não admite…

P1- A minha é tudo, “É só chichi”, quantas vezes, e tenho de suportar aquilo tudo…E há uma coisa que eu não quero, é eu dar cabo de mim, literalmente, eu precisava de uma mulher permanente lá, seriam à volta de 1000€ mês, 500 que eu já dou, com mais 500 já não era mau…

M- Ok

P1- Que era para eu sábados e domingos, o que faço sábados e domingos, faço com tempo…E por falar nisso tenho 65€…uma fortuna….

M- Mais uma grande fortuna!

P1- 65€? Uma fortuna, por na guerra numa zona de intervenção, muito pior…. Eu precisaria que fossem mais 500€, com 500€ que dou, tinha a mulher de segunda a sábado só 3 horas por dia, já eu tratava o resto, porque 500€ que eu estou a dar com outros 500 dava para o sábado e domingo. Que eu quando andei na guerra houve alguém que disse, quando vem sábado e domingo parece que tenho um tenente em cima de mim, que não tem lá a pessoa tenho que ir eu…de manhã à noite…de castigo…

M- Pois, aos fins de semana e feriados, e feriados, não é? E feriados com certeza…

P1- Não não, ela não tem feriados, é sempre de segunda a sexta, sábado e domingo é que não.

M- Ok, muito bem…. No seu caso?

P2- No meu caso é terrível também!

M- É agora que vamos ter que lhe dar dinheiro, não é?

P2- É agora!

M- Explique lá isso!

P2- Eu recebo limpos 700€, recebia 700€, a minha era 350€, e eu pago uma renda de 200 o que é barata, pago mais outra de 400€ que é a minha casa da Ericeira que tive de deixar para estar ali, que é minha e tenho de pagar a prestação. O meu filho ficou doente há 2 anos, foi para ao pé de mim sem dinheiro [risos]. Só com o meu dinheiro, tenho de pagar a alimentação dela, a nossa alimentação, há 1 ano e meio é que estou com metade do dinheiro, mas até ali eu sobrevivi com este dinheiro, para tudo, não é? Pronto, agora também não quero sobrecarregar a outra parte, já só trabalho 3 dias, já pronto, só ganho metade, já estou reformada, agora receber a minha reforma, que é 600€, é muito dinheiro [risos]

M- Outra fortuna…, mas e despesas especificas com a mãe…

P2-…estas despesas que eu tinha com ela na altura, a farmácia era muito cara, porque a minha mãe não tomava os genéricos, a minha mãe queria os….

M- De marca…

P2- Exato, de marca, portanto era muito dinheiro em farmácia, sempre que se lá ia era aos cento e tal euros e não era por mês, a minha mãe toma muita medicação, além do que ela toma para a demência não é, ela toma muita medicação, portanto, gastava muito mais. Comecei a ter que reduzir em alguma coisa senão não dava para a comida e então aí foi o genérico e aí consegue equilibrar mais ou menos, consegui ir aí aos valores de sessenta e tal, portanto, só para a medicação dela. Depois com o resto…

M- Sessenta e tal por mês, diria que gasta?

P2- Sim sim, sim, para os dela vai mais ou menos isso, porém nos genéricos, porque há muitos, que é muito barato, mas não sei se isso fará bem, se não fará…. Se é a mesma coisa que estar a tomar…

M- Não…. Toda a evidencia mostra que é a mesma coisa, portanto está bem com o genérico…

P2- É? Não sei, eu sei que quando ela esteve aqui hospitalizada, eles davam-lhe genéricos, então se eles dão genéricos deve ser o que faz melhor…senão era uma fortuna na farmácia, então foi para os genéricos, sim…e no resto, nas fraldas e nos pensos, de antes, portanto, para não estar sempre a por a fralda, eu consigo equilibrar…

M- Quanto é que gasta em fraldas e?...

P2- Aos saldos, aos saldos…é conforme…

M- Por mês é o que, diria o que? Uma média?

P2- Não sei, não consigo, porque nunca tive, tirei concretamente para isso, sei pela farmácia porque é aquele montante que a gente quando vai comprar mete, olha está em promoção vou levar agora, não…não faço uma estimativa… não consigo…

M- Ok, mas só para eu perceber, trabalha três dias por semana, já por causa dos cuidados ou foi uma opção sua?

P2- Ah, foi mais, não foi mais precisamente para estar mais tempo com ela, lógico…

M- Portanto aí também gasta dinheiro porque não esta a trabalhar também

P2- Aí foi mais uma opção para poder estar com ela, porque poderia estar a trabalhar, lógico, não é? Eu só, demoram-me a hipótese com 47 anos de descontos e 65 anos podia-me reformar…. Epá, ótimo, que assim estou com ela, não ando nesta correria, não é?

Não tenho ninguém para andar a tomar conta dela e não ando a correr e ir para o centro de dia, ainda está, impensável, ainda não consigo, porque ela grita, portanto…[risos]

M- Ok…ok…

P2- É daquelas coisas que não vai ser fácil, eu já a fui inscrever, eu fui lá, há um la em (localização), tenho agora de apresentar os papeis da renda, aquelas coisinhas todas, portanto para poder, mas vai ser difícil, mas pelo menos fica lá, fica o nome… se perder completamente, não é? Porque ela conhece-me, não conhece o filho, não conhece isto…, mas tem que ser todos os dias, nós temos de dizer o mesmo: “ah minha linda, ah minha querida” …Que é para ela não esquecer… Portanto, o meu marido chega a casa: “Ó minha querida, como é que estás?”, “Onde é que tu estavas, o que fizeste?”, é sempre a mesma coisa, passado um bocado ela diz-lhe: “Ah, já não te vejo há muito tempo…”, e ao neto a mesma coisa. Portanto, a mim, ainda assim, ainda vai porque é constante, tem de ser o constante, é dizer sempre as mesmas coisas…. Se deixo de lhe dizer sempre as mesmas coisas esquece!

M- O que é que…. Vocês têm tido outro tipo de apoios, do tipo, receber informações, treinos, treinos sobre como cuidar, informações, formações sobre isto… Há pouco o P1 dizia que podia já dar umas aulas, no sentido de dar formação a outras pessoas… Têm recebido alguma coisa deste tipo? De alguma parte?

P2- A mim não…Não, não…

P3- Assim, às vezes quando, já tenho ido a coisas como conferências, mas não…

M- As conferencias que falou há pouco, é conferencias nesta área que se tem interessado ou vai a outras conferencias?

P3- É conforme o que aparece, gosto de variar…

M- É conforme…. Ok, muito bem…

P1- Como eu disse, há pouco como eu disse, aprendi muito com estas coisas…

M- Aprendeu na prática, aprendeu na prática, não é?

P1- Depois concretizei este estudo que fiz, três casos diferentes, causa igual, causa demência…

M- E realidades muito diferentes, não é?

P1- Totalmente, dentro da mesma faixa etária…

P2- O nosso computador é complexo, a partir daí…pronto

P1- Exato, mas repare que falar em demência não chega…

P2- Exato…

P1- É preciso que tipo de demência…

M- Que tipo de demência…

P1- Eu acho que é há diferenças uns dos outros

M- E depois cada pessoa se calhar, vive-a de maneira diferente, não é? Mas o que que vocês acham que seria importante fazer em termos de, uma coisa é o dinheiro…1000€ já vimos que era uma boa, 1000€-1200€ era uma boa métrica, uma boa ajuda…Mas para além do dinheiro, o que é que era preciso acontecer ou fazer para vocês terem mais facilidade de poder viver como bons cuidadores que são mas com mais qualidade de vida…

P1- Com 1000€, nem precisava de mais nada, sabe porquê? Porque eu prefiro cuidar da minha mulher do que outra pessoa qualquer, eu sei sequer lá queria uma mulher em casa, era eu! Eu a ter os sacrifícios, mas se de repente…desculpe, eu estou a falar enquanto tenho alguma saúde, quando não tiver, tenho que prever só…Preciso de lá ter uma pessoa em casa que tome conta dela e eu estou refugiado, até posso morrer, nesse caso, ela está, o médico de família disse que ela está, tem direito a tudo, e eu a tudo o quê? O que é esse tudo? Então, eu julgava e isso foi qualquer coisa que eu ouvi e é até talheres, tem direito, carrinho de rodas tem direito, um poliban, a senhora estava a dizer que precisa de um poliban lá em sua casa…

P2- Pois…também…

P1- Há pessoa que fazem por 900€, eu conheço um tipo lá duma empresa, eu posso-lhe dar um telefone de um tipo que até é preto, um tipo exemplar…

P2- Não é preto, é negro…

P1- Negro é, como quiser, que eu não me importo…

P2- Eu já tive uma coisa assim e deram-me um estalo... há duas semanas…[risos]

P1- Para mim é preto, é cabo-verdiano, trabalha numa empresa e depois aos fins de semana faz aquilo…fiz por 900€ e levavam-me 1500…, portanto se quiser, que é barato, ninguém faz isso…

P2- Pois não…que eu tive de fazer obras lá em minha casa, na minha casa, no andar de baixo…

P1- São tipos que vivem mal e fazem…

P2- ...no andar de baixo que está para alugar e eu perguntei…3000€…

M- Mas por exemplo, este tipo…. Nós estamos aqui, à relativamente pouco tempo, e o P1 já deu aqui umas dicas à P2 sobre o facto de ter direito em relação a um poliban, até em termos de dicas práticas…

P2- Mas tenho de ver isso, onde é que a gente vai buscar essas coisas?

P1- Não depois vai, desculpe, pede fatura…

P2- Sim, lógico…

P1- Paga a fatura e depois apresenta no local próprio, se quer que lhe diga, nem sei onde é que é…

P2- Pois, mas é isso que eu tenho de saber…

P1- Sei que há uma em (localização), há uma cada capital de distrito, que trata disso, e vi uma publicidade na televisão, muito vaga…

P2- Mas vai-se à NET (internet), aí se calhar eles lá…

P1- Muito vago…Não são concretos!

P2- Não, é vago, mas é tudo vago, quando seja para dar, é tudo muito vago…

M- Vocês são, vocês são associados da, de alguma Associação de doentes, de alguma, não?

P1- Não, nem seguros nem nada disso…

M- Ok

P2- Ela esta isenta de tudo…

M- O que é que pensa sobre isto P3, em relação a outros tipos de coisas para alem de dinheiro, o que seria necessário acrescentarmos para dar apoio?

P3- Eu acho que, é preciso, acho que era bom a gente ter uma certa formação, eu penso que sim…

M- Em que áreas é que vê ser mais importante? Formação a que nível?

P3- Ah, talvez, para mim, é psicologicamente, ajudar-me a ver a coisa com mais realidade, porque custa-me um bocado…

P2- A parte emocional, a parte emocional…porque deita-nos muito abaixo, e termos mais paciência, que no fundo eu sei que tenho de ter, tenho de ter….

P3- Não mas isso ei eu tenho paciência, e sei que a estou a perder muito a paciência!...

P2- Mas temos de ter, pronto, tem… E, no entanto, também há alturas em que a pessoa, eu também estou a gritar, tá a ver? E depois dou por mim, bem, ela não está, porque, não é? Temos de engolir…

M- E a formação, e a formação?...

P3-…. Ajuda a compreender melhor…

P2- Exatamente!

M- A formação ajuda a compreender isso, ok?

P2- É isso…

P3- Por outro lado, acho que a pessoa cuidadora, também precisa de tempo para ela…

M- Hum hum…

P3- Acho que não…pronto, uma coisa com qualidade a gente tem de estar disponível para um certo número de coisas que as vezes não está…

P2 - É mas eu acho que ter, para mim, eu vejo na minha, para mim, alguém que lhe fosse dar banho, que a pusesse, está a ver? Todos os dias como deve ser, eu já tinha mais tempo, tinha mais tempo não, tinha mais paciência…. Pegava nela, vestia-a, porque tenho de a vestir, não é? Pegava nela, descia as escadas devagarinho e trazia-a para a rua, está a ver? Porque eu sou incapaz, não consigo trazer a minha mãe para a rua suja! Porque ela não se lava, como não se lava, não me deixa estar a tratar dela, está a ver? É guerra diária! Se é guerra diária, não consigo pegar nela e trazê-la um bocadinho para a rua para ela ter um bocadinho de mais qualidade de vida, é só quando tem de ir ao médico e tenho de fazer uma algazarra, portanto é, horrível!...

P3- Pois, eu não tenho paciência suficiente para, eu não tenho, não tenho…

P2- E depois eu penso assim: “Ah coitadinha, mas porque é que eu tive a gritar, ela não tem consciência…” não é? E depois fico com remorsos, e isto é horrível…

P3- Eu não, é remorsos…

M- Portanto, uma formação sobre como lidar nesses casos era importante?

P2- Eu acho que sim, era importante…

P3- Eu acho que não é uma questão de remorsos, é uma questão de: porque é que não tenho paciência suficiente ou calma suficiente para aceitar isto? Eu, não é remorsos, porque faço as coisas e depois passou…

P2- Ah, mas eu depois tenho…

M- Gostava era de compreender melhor, não é?

P3- Sim, era, sim, perceber melhor ca dentro porque é que eu, não era assim, hoje estou…

P2- É a idade, com a idade…

M- Vocês não estão a falar só de formação, estão a falar de ter um espaço também para vocês trabalharem as vossas emoções e por aí fora, não é? Dúvidas…

P3- Sim…

CM- Aqui o P1 estava, quando falaram em remorsos estava a dizer-me que, de facto os remorsos e a culpa porque, de vez em quando também perde um bocadinho…

P2- Epá, perco!…

P1- não estou a dizer que isso está mal…estou-me a referir…

CM- Ficasse a sentir é mal consigo…

P2- É! Porque é que não tenho mais paciência?

P1- É! E não só, eu estou a falar também por pessoas que contactam com ela…. Há uma irmã que…

P2- E levantar a voz… Eu tenho de manter a voz baixinha, que é quando elas acalmam… Às tantas, a pessoa eleva a voz, e eu sinto que quando elevo a voz, que ela ainda fica mais…

M- E depois sente-se culpada, mas o P1 ia dizer outras pessoas ainda…

P1- Quando fui operado aqui à mão, eu tive no hospital, ela foi para casa de uma irmã dela, ali em (localização), e a minha cunhada, neste caso, punha-lhe a fralda e tal, e depois enervava-se para lhe lavar os dentes, porque lavar os dentes é um problema, ela fecha os dentes: “Abre a boca (nome do doente), abre a boca!” e ela: “Aí”, a enervar-se e depois ela disse para mim: “Ó (nome do participante), eu enervei-me com ela, agora estou com remorsos” a chorar e “não faz mal, deixe lá, isso não faz mal!”, isso faz parte de nós todos…está dentro dos nossos…

P2- Isso é horrível!…

M- Hum hum…

P1- Dos nossos genes, portanto, mas a paciência também não a controlamos por vezes, isso, por isso é que eu digo, que eu precisaria de várias horas e mesmo alguns fins de semana, que eu quero cuidar dela e quero estar em condições…

M- Portanto, era uma questão de dinheiro para contratar alguém para ter mais tempo e depois para si…

P2- Quem sabe, para a pessoa poder estar mais tempo com eles…

P1- É uma questão de uma necessidade que vai, talvez, evitar um excedente minúsculo, que vai ditar amanhã que eu esteja internado, e ela também, acamados!

M- Ah ok, ok, boa, prevenção…prevenção no fundo…

P1- Porque ela…Ah, é isso um bocadinho, porque ela já andou e agora está a andar melhor, mas pode ficar acamada de um momento para o outro, se ficar acamada, como é que é? Eu não posso agarrar em 1000€ para pagar a uma mulher…

P2- A gente chega a ter pena de nós…

M- Muito bem…

P2- Uma pessoa não tem tempo para nada, eu preciso de ir ao médico e não  vou, porque já fico saturada, no hospital e no médico…Eu preciso de ir tratar disto, preciso de ver um problema que tenho na garganta e não vou, porque já sei, se vou, já é exames exames exames…Fico!!...Só de pensar que tenho fazer aquilo tudo com a minha mãe, quer dizer, é o tempo que depois não há para nos também, nem paciência…

P3- É uma tensão! [risos]

M- Tempo e energia…

P2- É horrível!

M- Portanto já não vai ao médico, já não vai para si…

P2- Eu vou ao medico, preciso disto ou daquilo, o médico está, eu estou-me a rir, está tudo bem…. Quando vai, estou aqui com este problema na garganta à tanto tempo…Ainda não falei à médica nisso, tenho não sei quê nos ouvidos, ainda não falei à médica nisso…Já viu? Há “N” coisas que tenho…

M- Portanto, esquecem-se de cuidar de vocês próprios…

P2- Exatamente…

M- Muito bem…

P1- Aquela só, só um à parte, há aqui uma diferença abismal entre nós, entre os nossos dois casos, porquê? É que a sua mãe é agressiva e a minha… não é…

M- Não é…

P1- Portanto, eu tenho de ter um tratamento diferenciado, não é diferente, é diferenciado do seu e para o ter tenho de estar, não é em plenitude, tenho de estar pelo menos a 80% da minha capacidade… É aí que eu tenho medo, que ela fique acamada e eu também, e as minhas filhas também estão assim….

M- Pois…

P1- Com esse medo…o que é que vai ser de nós?

M- Pois…. Ok

P2- Vai para o lar! É assim que a minha tia me diz: “Vai para o lar!” …Mas porque é que eu hei de mandar a minha mãe para o lar, se a gente pode cuidar dela, não é? Que é triste!... “Vai para o lar”, não é fácil!!...

P1- Nós estamos aqui a falar todos…e isto eu vim aqui hoje, a pedido da menina CM, vim e não devia de vir, e a minha filha disse-me: “Não vá que está constipado, está a ficar doente”, mas está a passar já, “Está frio, e não sei que mais…” e eu disse: “Não, eu vou!” porque penso que vai ser importante, não por mim como já disse, eu não sou egoísta, mas tantos casos que estão por aí fora e não estão aqui neste momento!

M- Olhe muito obrigado por ter vindo, porque foi muito útil nós termos aqui os vossos pareces, e a vossa experiência, não é? Partilhada! Há mais alguma cosa que queiram dizer antes de terminarmos? Se calhar já tomamos muito o vosso tempo, já estamos aqui há uma hora e vinte…

P1- já à uma hora e vinte? A mulher que está na minha casa tem de se ir embora…

M- É…

P1- Só, só queria dizer que achei muito importante isto, gostei muito da presença de todos e espero que seja uma sementinha só, pequenininha, nem que seja depois de eu morrer, daqui a 10 anos, que fique cá, e nessa altura já não haja estas carências que estamos aqui a divulgar…

P2- E a experiência política do nosso país também tinha de mudar…[risos] e para isso estas pequeninas coisas são importantes…são muito importantes [risos]…

P1- Se fossemos falar da nossa política podíamos estar aqui até janeiro do ano seguinte!...

M- A P3 ia dizer alguma coisa?

P3- Ah, não eu também acho que do ponto de vista económico, isto é mesmo, por exemplo, o meu irmão não tem os apoios, penso eu, que ele realmente necessitava, porque ele tem bens…

P2- Por causa da reforma dele?

M- Porque tem?

P3- Bens…

M- Bens…

P3- Porque paga bem…

P2- Vende os bens, pronto…

P3- Vendo os bens como? Às vezes ele lembra-se…[risos]

P1- E há outra coisa aí, eu tenho isto também, tenho terrenos em Viseu, eu tenho vinte e tal artigos em que pago IMI (imposto municipal sobre imóveis), penhascos, pinheiros, silvas…uma vez antigamente lá uma casa de um amigo…já tinha a mais, não me importava de ficar com os artigos, casas…casas com terraços, tenho outra…

P3- Pois é essas coisas…

P2- Eu só tenho uma casa, e não a habito…

M- Pois…E paga IMI (imposto municipal sobre imóveis) disso tudo…

P1- E pago IMI (imposto municipal sobre imóveis), isso, sabe que isso conta para a isenção das consultas…cortam-me!

M- Cortaram as isenções por causa disso?

P1- Sim…

M- Pois! E no seu caso, e é um pouco a mesma coisa com o seu irmão…

P3- Exatamente! Tem uma casa na (localização), pronto, está tudo dito!

P2- Está está! É chique!...

M- E a partir daí já não tem direito nada… já não tem direito nada…

P2- Nada! Se tem uma casa na (localização), é chique!.... Pronto…

P3- Pronto, é assim…

P1- São políticas nem vale a pena mexermos nelas!

M- São muito cegas, não é?

P1- Agora isto pode ser a tal sementinha, eu acho!

P2- Pois exato!

M- Muito obrigado! Muito obrigado por terem vindo!

Todos os participantes- Obrigado!

***Focus Group* B**

M- Moderator

CM- Co-moderator

P4- Caregiver, female (daughter)

P5- Caregiver, female (daughter)

P6- Caregiver, female (daughter)

M- Bem, se calhar íamos começando, até porque fim de tarde vocês também têm provavelmente os vossos tempos contados, não é? Obrigado por terem vindo, eu sou o (nome), já conheço obviamente a CM, não é? E a CM fez-vos o convite na sequência da participação naquela parte do questionário, não é? A ideia aqui é conversarmos para, no fundo, chegarmos a uma coisa mais limitada e a ideia é conversarmos um pouco mais, para percebermos um pouco melhor a vossa vivência na função de cuidadores, não é? Há coisas que um questionário não nos consegue dar, portanto a ideia é fundamentar um pouco a informação que a CM obteve através dos questionários com outras pessoas…200 pessoas…

CM- Já passa das 200…

M- …mais de 200 pessoas, e agora também estamos a fazer este conjunto de reuniões que damos o nome de *Focus Groups* que é uma reunião focada num tema, aqui o tema é obviamente o cuidar de um familiar com demência ou alzheimer, e portanto é uma conversa focada e uma conversa sem regras nenhumas, portanto, basicamente, eu tenho aqui um conjunto de tópicos para ir abordando, mas eu até nem ligo muito a isto e vamos conversando e se houver aqui alguma coisa que falte dos tópicos, aí sim, irei abordar esse facto. Já alguma vez estiveram num *Focus Groups*? Numa coisa destas?

Todos os participantes- não, não…

M- Usa-se muito nas marcas comerciais também, o pessoal da coca-cola gosta de fazer estas coisas…

P4- Ah, mas eu não tenho paciência para essas coisas, eu venho aqui pela minha mãe e pela saúde, peço desculpa…

M- Claro! Usa-se muito nessas áreas mas também se usa muito em investigação na área saúde, muito em particular…Eu se calhar começa por, portanto, já disse o meu nome, conhecem a CM, a (nome da anotadora), nos os dois estamos aqui na função de moderadores, portanto é ouvir as vossas experiencias, aquilo que quiserem partilhar, como dizia não há regras, desde que não andemos à batatada vale tudo…[risos]. E aqui a (nome da anotadora) é a anotadora, portanto vai tirando notas de coisas que se vai lembrando, à medida que ouve, até relacionando umas coisas que já sabe sobre o assunto e por aí fora…Se calhar começávamos por si, se pudesse dizer o nome…

P4- O meu nome…?

M- Sim…

P4- (nome completo do participante)...

M- P4, P4 chega...

P4- (nome do participante) chega, é natural, como eu costumo dizer…

M- Mais precisamente P4…

P4- Não é bem!...

M- P4, e já agora se calhar, ah é verdade, vocês viram aí que nós vamos gravar isto, certo? E a ideia de gravar, e isto é importante, é tudo anónimo, como dizia aí no consentimento informado, nós só gravamos para ouvir tudo, para podermos estar mais focados em ouvir-vos e depois tornamos a ouvir, fazemos uma coisa que é a transcrição, ou seja, passamos o que está em áudio para papel e depois fazemos uma coisa que se chama análise de conteúdo, que é basicamente, com base neste *Focus Group*, mas também nos outros tirarmos alguns padrões, algumas ideias que sejam mais ou menos comuns, depois o que fazemos é, fazemos um resumo rápido do que saiu das 8, das 5..

CM- 4…

M- 4 conversas que vamos ter, esta é a segunda… e depois enviamos para vocês, para vocês verem se é, se se revêm naquilo, sendo que não está lá nada de especifico de uma pessoa ter dito, nem aparecem nomes, é só ideias gerais, e podem acrescentar ou podem dizer sim, eu concordo com isto mas, há aqui outra ideia importante, que era importante para depois contribuir também nessa dimensão…está bem? P4, falou da…é a sua mãe, não é? É cuidadora da sua mãe…

P4- sim, tem 88 anos.

M- 88 anos, e vive consigo pelo que eu percebi…

P4- Foi viver para minha casa, eu levei-a para minha casa…

M- Já na sua casa, quem é que vive mais?

P4- Eu e ela….

M- Só?

P4- Só….

M- Ok…

P4- Os meus netos vão lá…assim…passar a sexta-feira, às vezes de quinze em quinze dias… Ou passar dois dias ou se eles, sei lá, passarem o fim de semana fora eu fico lá com os miúdos, mas é…

M- Ok, é mais a P4 e ela… No seu caso, o seu nome?

P5- Eu sou a (nome do participante)

M- P5…

P5- A minha mãe tem Alzheimer, tem 76 anos, e é assim sou cuidadora, fui cuidadora até setembro, porque, entretanto, houve uma evolução na doença e tive que a colocar numa residência…, mas durante 6 anos cuidei dela…

M- Ok, sim…6 anos e foi agora até setembro…

P5- Sim…

M- Portanto, muito recente…ok…muito bem…

P5- Sim…

M- E estava sozinha em casa com ela?

P5- Não não, estava comigo, estava, é assim também a fui buscar na sequencia de ter partido o úmero e como não tinha, é assim, a minha mãe é de (localização), as minhas avós não queriam saber, a empregada também não era uma pessoa competente e tive que tomar a decisão de ir buscá-la e foi aí, também foi aí que foi diagnosticado o Alzheimer, porque estava mal diagnosticado, foi mal diagnosticado…

M- Como é que sabe, já agora, era o quê? O que é que eles achavam que era?

P5- Disseram que era, como é que era? Aterosclerose não sei quê, e até levei uma carta à Professora D e ela ficou parva… E disse logo que não, que era Alzheimer, pela da história toda que eu lhe contei…

M- Hum hum…

P5- E pronto, e a partir daí foi sempre seguida pela Professora, e depois participou neste estudo…

M- Ok, e vive, vivia só com ela ou mais pessoas?

P5- Não, é assim, eu tenho 5 filhos mas, é assim, com a minha filha mais velha já quase não esteve, apesar de já ter mais ligação com ela, porque entretanto foi estudar para fora e depois estivemos, esteve, estivemos 7, éramos 7 em casa e depois entretanto saiu outra, e agora ficámos só, eramos 6, e entretanto, é assim, a minha mãe foi muito estimulada porque eu tenho 3 filhos mais velhos e 2 mais pequeninos e foi muito estimulada por eles, além de que tenho, outra, tenho o meu filho que tem síndroma de X frágil, e pronto, mas apesar de tudo era estimulada e tinha uma forte ligação com eles…

M- Ok…. Já agora o, que idade é que tem esse filho?

P5- Tem 13…

M- 13, ok…muito bem, muito bem, ok…E no seu caso?

P6- Eu sou a (nome do participante), eu sou funcionária aqui do hospital, a minha mãe já foi diagnosticada à cerca de, talvez 14 anos, e foi pelo, na altura era o Doutor, Neurologista, aquele senhor que usa lacinho, agora perdi o nome dele…

CM- Doutor H…

P6- Sim…

CM- Doutor H…

P6- Doutor H, e pronto, foi de acordo com aquilo que eu me estava a aperceber, porque a minha mãe cuidava da minha filha, que está, vai fazer agora 20 anos, ela é que tratava dela, e eu achei que havia perguntas que ela me fazia que não estavam de acordo, como por exemplo, dar a terapêutica muito simples, febre, ben-u-ron e na na na, e ela achava, baralhou-se muito e uma vez foi ter a minha casa, e entrou no barco, eu moro na outra margem, e não sabia… “olha, aconteceu-me isto, o que é que eu, o que é que será?”, e eu tomei aquilo como um alerta, falei e pronto, fomos aí, foi a hipótese de uma demência de *Hashimoto*, porque ela tinha uma tiroidite, mas depois foi, fez os testes e então foi diagnosticada uma demência. Neste momento, o meu pai partiu há dois anos e meio e aí teve um agravamento da situação.

M- Há quanto tempo, desculpe?

P6- Dois anos e meio…E acho que a minha mãe neste momento está a perder a orientação, já falei nisto também com o Professor I, neste momento, há uns anos é o Professor que está com a mãe…Ele também que a mãe devia ter alguém a nível, ou em casa, porque eu trabalho o dia inteiro, a minha irmã também, possivelmente não,  é um bocadinho incompatível ela ficar com a minha irmã, ir para uma, um dito lar, também não nos é muito confortável apesar de saber que é uma porta aberta porque começa a ser perigoso e há coisas que eu muitas das vezes nem sei, não é, nem sei como é que estão porque só apanho umas coisas no ar, é um bocadinho mais isso, noto nela, porque ela mais ou menos regia a terapêutica dela e sabia o é que tinha de tomar, de manhã e tal, ela ainda vai saindo diariamente, para dar a voltinha dela, para ir ao supermercado, à pastelaria, isto vai fazendo, e é para estimular e fazer…

M- E vai fazendo sozinha?

P6- Vai. Agravou muito a situação de parte do esqueleto porque tem muitas dores e tem muita dificuldade, agora o que eu noto, é que não sei se já estou a esticar-me na conversa…

M- Não, não…hum, a ideia é um pouco esta, esteja à vontade…

P4- eu por acaso, enquadra-se bastante naquilo que eu…

CM- Ia só perguntar, não ficou claro, a sua mãe vive consigo?

P6- Aí, a minha mãe vive sozinha, em casa dela…

CM- Ela vive sozinha?

P6- A casa sempre foi a casa dela e do meu pai, pronto…

CM- E é perto da sua?

P6- Aí, não tem nada a ver, eu moro no (localização) ela mora na (localização), não tem nada a ver…. Eu estou aqui o dia todo…

CM- E passa por lá para controlar?

P6- Às vezes, não muitas vezes, porque ela também não quer, e também eu ir lá e sentir que lhe estou a dar trabalho, eu prefiro não ir e…

P4- Mas ela vai e ainda faz assim muitas coisas?

P6- Ela até pouco tempo fazia comer, até dizia: “Olha mãe eu vou aí jantar…” e ela fazia. E ela ainda vai ter comigo ao (localização), eu vou buscá-la ao barco, vou pô-la ao barco…

P4- Que idade tem ela?

P6- 88, vai fazer 88 em fevereiro…

P4- 88? A minha tem 88…

P6- Portanto está assim, neste momento está assim... Noto que a nível de terapêutica tenho medo, e eu já falei nisso com a minha irmã, a nível de terapêutica eu penso que ela já está um bocadinho baralhada com a terapêutica

P4- A minha mãe começou a baralhar tudo, eu não a deixo tomar nada sem eu ver…

P6- Agora, eu não posso ir contra a vontade dela, não é?

P4- Só para se rirem um bocadinho, eu vou-lhe dizer, eu tomo muitos medicamentos porque tenho muitos problemas de ossos e isso, e então tinha posto o copo com cálcio efervescente…Ela inventa montes de doenças que constantemente, isto normalmente, e agora está a tomar uns que também é efervescente, quer dizer, os dela é escusado porque ela não toma nem sabe preparar nem nada, viu o copo com os meus, toca de enfiar! [risos] Bebeu, quando eu cheguei, “então?” …, mas foi segundos, “então já tomei!”, “Não era teus!”, “Aí não?” Depois e assim!...

M- Tem que dizer que os outros é que são os seus! Não percebi uma coisa, falou da sua irmã, a sua irmã vive mais perto dela?

P6- A minha irmã mora em (localização), mas não trabalha, mas também não sei se é ela…. Ela diz: “Aí eu não importo que a mãe venha ca para casa, mas é preciso que a mãe me queira…” … A minha mãe não quer, não é? De certeza… E eu também, já falei com o Professor I, tirar a mãe do meio…é um bocadinho complicado, não é? Porque ela tá no meio, não é? Ainda desce o segundo andar…

P4- Eu foi na hora, eu foi na hora…Comecei a ter chamadas da porteira de não sei quê que aquilo era chamadas para o 112, era chamadas para não sei quê, era chamadas, sei lá…Era um alvoroço lá em casa durante a noite e depois comecei a ver, e ela tinha uma empregada também, comecei a ver as coisas todas a degradarem-se, a ver, a ver… E eu assim: “Acabou” e eu depois, via episódios e realmente, as vezes dava para rir, mas a mim dava-me era para chorar...E para acabar com isso levei-a para a minha casa… A casa dela era alugada, a minha era comprada, portanto, não fazia sentido eu ir viver para dela…

M- No seu caso como é que foi o começo, como é que percebeu que havia algum problema?

P5- É assim, eu vou-lhe explicar, a minha mãe, deve ter começado até bastante antes porque quando os meus filhos eram pequeninos, por isso, o meu filho tem 14, tinham para aí uns 3 anos, a minha mãe estava repetidamente, perguntava-me, ela comecei a achar estranho, ela era assim: “Eles já comeram o iogurte?”, e passado um bocado outra vez: “Eles já comeram?” e é assim, eu comecei a achar estranho e depois até a levei a um médico, supostamente geriatra que não há cá, não era reconhecido e fui la uma vez e ele disse que ainda não estava e não sei quantos, mas depois mais tarde, foi outra vez, mas eu não a pude acompanhar, levei-a lá mas não a pude acompanhar dentro da consulta porque tinha as outras, minhas filhas mais velhas, eram pequeninas e tive de ir busca-las ao colégio e fiquei no carro à espera dela e ele já lhe receitou qualquer coisa, mas é assim, o meu pai teve uma doença, que é a doença de *Caroli*, que teve a doença durante uns 30 anos e aquilo foi um desgaste para a minha mãe, percebe?

E então, desgastou imenso, e é assim, e aí já se pronto, o meu pai dizia que ela já não, pronto, que dava cabo da cabeça e não sei quê e que ela sofria, e é verdade, que sofreu imenso, mas também foi um bocadinho desleixo, no sentido de ela não ter sido acompanhada percebe? Mas ela era só, dedicava-se só ao meu pai, era o meu pai, o meu pai, o meu pai e depois ele morreu à 6 anos, à 6 não à 7 e entretanto ela aí deve ter tido uma descompensação, no ano seguinte, que foi para a rua de pijama e não sei quê, largou os documentos todos pela escada abaixo, e foi aí que o meu irmão a levou ao médico, mas foi aí que ela foi mal diagnosticada, pronto…Está a perceber?

M- ok…

P5- Mas ela começou muito, é assim, supostamente começou aos sessenta e tal, porque se ela foi diagnosticada com 71…anteriormente estava…

M- Ok… E aí foi logo para a sua casa?

P5- Sim, foi para minha casa, sim, porque foi nessa sequência do braço e depois eu ainda a deixei ir para casa dela durante 3 meses, e que agora começo a pensar que foi uma inconsciência, porque ela ainda teve lá 3 meses que a empregada só ia de manhã, quer dizer, estar lá, porque supostamente ela já devia cair em casa, e a empregada não estava lá, percebe? Já devia ter quedas e ninguém estava atento aquela situação… Eu estou em (localização), a minha estava lá, quer dizer, os meus irmãos, um dos meus irmãos ia lá, mas não…

M- Hum hum…E ela parte aqui o osso…

P5- Parte aqui foi quando eu a trouxe, depois ainda esteve 3 meses que foi a fisioterapia e não sei quê, isto tudo aqui em (localização) foi quando a levei à Professora D, e depois ainda a deixei ir para lá 3 meses, quer dizer e depois, agora começo a pensar que foi uma inconsciência ter deixado ir, não é?

M- Hum hum…

P5- A pessoa depois começa a pensar em tudo o que se passou, quer dizer, e é uma inconsciência…

M- É fácil, olhar para trás é injusto, passado é passado!...

P4- É uma inconsciência, mas também eles, às vezes, a minha é assim eu digo-lhe alguma coisa e ela quando quer uma coisa, olha que ela uma vez deu-me cá um…toda a gente ficou…

P5- Querem assim! Sim! Ela não quer dar trabalho… Mas eu também penso, que se ela tivesse ido para lá, não sei, e depois eu para ir para lá sempre não podia, tinha que arranjar uma pessoa e também não havia o estímulo que ela teve aqui, também…Não tinha tido o estímulo que ela teve comigo, não é? A doença tinha se calhar tinha avançado muito mais rapidamente, porque ela ainda esteve mais ou menos estável até há…até junho que foi quando ela partiu o colo do fémur, foi aí que também a doença avançou muito…

M- Ok, como é que vocês, quais foram as alterações que foram vendo? Falaram aí de coisas da personalidade, não é? Esta coisa de ser teimosa, não é?

P4- Não, a minha mãe sempre foi teimosa, independente, nunca gostou de fazer rigorosamente nada em casa, era uma mulher muito, muito independente, mesmo quando se reformou, ela de manhã estava em casa, o meu pai já estava doente, que ele era 11 anos mais velho que ela, e ela saía, às vezes andava-me ele a telefonar: “Sabes da tua mãe? Já são 9 da noite e ainda não veio” …. Pronto, ela era muito independente, ainda hoje em certas coisas, quer ser muito independente, tanto que ela, quando às vezes a gente se zanga, porque também nos zangamos e eu não sou, eu sou de carne e osso como os outros, e também nos zangamos, e ela então diz que vai arranjar um quarto, ou que vai para uma residencial…[risos]… e eu disse: “Não vai não senhor, porque não sai daqui que eu não deixo”, “Era o que mais faltava, pensas que mandas em mim, mas não mandas, que eu sou independente, tenho dinheiro que chegue para mim, não tenho?!”, quer dizer “Tinha antigamente, mas hoje em dia já não dá”, pronto começa por aí…Mas depois entramos nesta de bate boca, que já dura à 6 anos e acho que ela apesar de tudo, e apesar de agora eu ter notado uma, como no seu caso, uma queda grande, porque ela por exemplo, separava os medicamentos dela, tratava dessas coisas todas, cozinhar, eu lembro-me que ela uma vez me fez um coisa, foi quando foi lá para casa, nessa altura, nem sei, nunca mais me esqueço, fez-me uma fatia de pão de forma com uma gelatina em cima, era o meu jantar, foi o que ela fez para o meu jantar… Também não é dela, porque ela por acaso para cozinhar, até gostava, desde que não tivesse de arrumar a cozinha, tudo bem, mas pronto é uma pessoa que não é, é muito receosa dela, é muito cuidadosa com ela, sempre, os outros que estão à volta, seja quem for, tenham o que tiverem, desde que não afete lá o bem estar dela, tudo bem…percebe? Se tiver doente, se eu tiver doente, ela não é capaz de chegar ao pé de mim e dizer: “queres um copo de leite, queres…?”, nada, zero! Zero! E eu já tive problemas graves desde que ela lá está em casa, e agora para a semana vou ter outro, que não sei como é que vai ser, mas enfim!…Ah, mas ela mesmo quando sente alguma preocupação, a preocupação não é comigo, é com ela, percebe? É com ela, é muito receosa do seu banho, eu é que lhe dou banho, eu é que faço e eu é que aconteço, eu tenho de lhe cortar o cabelo, arranjar o cabelo, tenho que lhe tirar os pelos, tenho que fazer tudo e mais alguma coisa, arranjar os pés, pintar as unhas, está a ver? É tudo assim, e ela não quer saber se eu estou bem, se estou mal, se estou doente, se não estou, está-se maribando! Ah, pronto…

M- Eu ia perguntar, no seu caso, se viu alterações muito, na forma de ela estar, de ser?

P5- Sim, houve umas alterações de personalidade, sim! Porque havia dias que estava muito bem outros dias não estava, era assim depois havia dias, mas não é assim teimosia, havia dias que dizia que ia para casa dela e eu dizia “Pronto, sim vai!”, percebe? A pessoa às vezes está…, mas depois, já dizia que não queria ir, queria era estar comigo, porque ninguém queria saber dela e não sei quê, pronto…Não sei isto depois a doença tem a ver com o caracter de cada pessoa, ou a personalidade, não é? Não sei se tem a ver, porque é assim eu já ouvi casos…

M- Ninguém sabe ao certo se calhar…

P5- Pois porque eu já ouvi casos de pessoas a dizer, porque a minha mãe nunca teve a tendência para sair de casa ou fugir de casa como dizem que há pessoas com a doença que têm…

P4- A minha antes pelo contrário, tem muito cuidadinho com ela…

P5- …para sair, mas…

M- Essa é uma questão importante no seu caso, não é? Porque ela ainda está muito autónoma, saí, não é?

P6- Vai arranjar o cabelo, vai a pé ao restaurante…

M- Mas tem desorientações espaciais, não é? De vez…se eu percebi há pouco…

P6- Tem, tem algumas desorientações e nota-se, eu acho pronto, que houve ali até ao meu pai está cá, em casa, mesmo o pai estar todo metastizado, depois teve mesmo de sair de casa, não é? Até ele ser vivo, havia a preocupação de cuidar do meu pai, de fazer um miminho para lhe levar de comida, de ir vê-lo à clínica, de pronto…Notamos que foi muito, e eu escondi a doença do meu pai ao máximo para poupar toda a gente, eu sabia, alguns meus sobrinhos, são mais ou menos da minha idade sabiam, mas muito poucas outras pessoas sabiam, a gravidade, porque era metastizado dos pés à cabeça, ossos e tudo…E ele sempre me pediu, sabia aquilo que se estava a passar com a minha mãe, e pediu para eu por a minha mãe num lar quando ele partisse…

M- Ele pedia?

P6- Porque o meu pai era um homem que trabalhou aqui, sabia bem da situação e sabia da desorientação e sabia da teimosia dela e do mau feitio dela, eu acho que tudo se torna mais exacerbado com um doente destes…A agressividade, então comigo, eu sou a pior filha, a pior tudo, a pior mãe, a pior tudo! Detestável! Não há uma manifestação…

P4- De carinho…

P6- …para comigo, não tem, só de “tu és isto e aquilo e o outro!” pronto!...Aquilo…

M- Mas isso é sempre ou há momentos em que é o contrário? Ou como é que é? É sempre assim?

P6- Comigo é muito assim, porque eu não sou como a minha irmã, coitadinha, e é muito, são muito, estão muito dentro do parâmetro da idade, porque a minha irmã, parece tao velha como a minha mãe, claro! Quase! É um bocadinho isso, então eu estou mais dinâmica, eu é que trabalho, eu é que…Pronto e é isto tudo que me, não é bem visto se calhar por ela, então aquilo que eu noto é que ela não ouve bem as vezes o que eu, “Ó mãe tenta estar calma!”, “Eu não estou nervosa! Tu é que estás nervosa!”. E isso acelera muito os sintomas, eu sei que ela tem um esqueleto muito mau, tem muitas artroses, tem muitos problemas, sei que ela, está ali com um problema de mobilidade muito grande, mas sei que um dia, que até já falei nisso e é um bocadinho puxado…

M- Já agora o que é que faz?

P6- Eu sou assistente técnica aqui no hospital…

M- Ok ok

P6- Notei isso, mas notei muito depois da partida do meu pai e ela estar sozinha, agora é assim, ela ir para minha casa, eu não estou em casa, ela vai sair do meio dela para um meio onde ela não conhece…Eu estou sempre: “Mãe, vai vai”, “Eu sei, eu tenho de ir, nem que vá beber café ali à esquina”, “Isso mesmo, vai!”, pronto mais noto nela que está mais…

M- Ok ok, muito bem…

P5- Uma solução pode ser também tipo um centro de dia…

P6- Era isso que eu queria!

P4- A minha, eu tentei, mas não quis…

P5- Um centro… Ou é assim, algo tipo a Associação (nome)…, Mas aí, aí é complicado, a minha mãe ainda esteve na Associação de Alzheimer mas eles não dão muita resposta.

M- Não dão?

P5- Não dão, é isso que eu acho que, devia-se…é assim eu queria ver se me conseguia empenhar numa coisa de lutar por esta causa, porque acho que não dão muita resposta percebe? Porque a minha mãe começou a ir, eu no ano passado contactei a associação, e elas fizeram-lhe uma avaliação e começou a ir sempre duas vezes por semana. Acharam que ainda não estava muito avançado, e eu este ano, que achei que a doença já estava a avançar, propus a minha mãe começar a ir para o centro de dia e eles não…Entretanto a minha mãe caiu e não, e eu disse: “Olhe a minha mãe já não vai mais, com certeza agora, porque meteram-se as férias e não sei quê”, mas elas não me, eu disse: “Mas olhe de qualquer maneira, eu quero que a minha mãe vá para o centro de dia porque acho que ela necessita…”, entretanto elas não me deram resposta, nem sequer se dig…, não me ligavam! Eu liguei várias vezes e disse: “Olhe que eu preciso disto…”. Entretanto eu tive que ir recorrer a outra instituição para a minha mãe começar também a ir…

M- Uma associação também de doentes ou?

P5- Uma associação de doentes também, que tinha, e faziam muita estimulação, que eu vi que faziam, mas a minha mãe já não respondia. Já não… Porque estava sempre: “A minha filha, onde é que está a minha filha?” … Pronto, a conversa era esta…. É assim, por mais estímulo que elas fizessem, eu sei que faziam, ela não…

P6- hum…

P4- Isso era a associação do quê?

P5- É uma instituição que é um centro, que pertence à Igreja, ali a (nome), é ali em (localização).

P4- Pois eu tenho semelhante, eu moro em…no (localização)…

P6- É um centro de dia?

P5- É um centro de dia…

CM- Sim, é um centro de dia, nós vamos saber uma sessão lá…

P5- Pronto…E eu via que elas, percebe? Ao contrário da Associação (nome), que eu nunca conseguia lá entrar, entrava só para levar a minha mãe, ia lá às sessões que eles têm para os familiares. Eles nunca, eu não sabia que estimulação é que eles faziam lá à minha mãe, pronto… Porque eles nunca me deixavam lá entrar e nesse centro, eu chegava, levava a minha mãe lá acima e sei que elas faziam estimulação porque eu, depois disse olhe, a rapariga que fazia a estimulação disse que: “Aí sei que a mãe sabe a tabuada” … Porque a minha mãe foi professora e algumas coisas ainda… E então estava sempre lá com a tabuada para ela fazer, percebe? Porque ela diz que a parte do desenho, desenhar, já não conseguia mesmo desenhar…Apesar de eu em casa, ainda estar com ela, faz isto, tabuadas e ela dizia: “Porque é que eu vou fazer a tabuada?” e ela claro que não queria, não é? Escrever, já há muito tempo que não conseguia escrever…. Escrevia tudo mal, porque no outro dia ela disse-me que pôs os números todos uns em cima dos outros.

P4- Era, a caligrafia começa…

P5- Ou tipo croché que dizem que é ótimo para as pessoas que têm esta doença, mas tipo já há 3 anos, e ela fazia tudo mal e depois estava-me sempre a chamar: “Anda cá ver porque eu não sei quê…”. E realmente, não me era…. É assim, por mais que a mandasse, e palavras cuzadas também não, ler jornais, revistas, não sei quê, por mais que lhe comprasse, mesmo há 3 anos ela não… não tinha interesse em nada…

P6- Não tem porque isso é uma massada! Coisas mais lúdicas! [risos]

P5- O quê?

P6- Mais felizes! Eu acho que tem, peço desculpa, eu acho, a minha mãe vê as novelas quase todas [risos], eu acho que aquilo é giríssimo, e ela não baralha as histórias, eu não vejo nenhuma!

P4- A minha mãe não percebe nada!! Mesmo!

P6- Eu não vejo nenhuma, mas acho giro porque ela vai-me dizendo e vai falando, e a minha filha também cusca com ela as novelas, e eu acho giro e o Professor já falou comigo a dizer, “Então é ótimo!”, então vá cusca aí as novelas todas, vejam tudo… “E a Cristina (Ferreira) faz isto, e não faz aquilo, vai fazer este prato e vou aprender!”. Tudo isto, é mais feliz!

P5- Sim isso é bom, mas por exemplo, a minha mãe, ela não, era só o telejornal que ela via, as notícias, que eu até lhe perguntava e não sei quê, e ela não, depois não sabia dizer…percebe?

P4- Pois! A minha mãe só quer futebol…

M- Vê futebol?

P4- Cristiano Ronaldo e Cristiano Ronaldo e Cristiano Ronaldo, e futebol… Ela, mas ela depois não percebe nada daquilo…

P5-… Como nunca gostou de ver telenovelas…não…

P6- Pois, é isso…

P4- E a minha mãe, por exemplo, não gosta muito de ver telenovelas, detesta, sempre detestou como a minha avó dizia: “A tua mãe nunca gostou de pontos”, portanto, não gosta de cozer, não gosta de fazer croché, não gosta de fazer nada dessas coisas! Detesta tudo isso, e quanto ao centro de dia devo dizer que em problemas com a demência tive um acolhimento fantástico!

M- No centro de dia?

P4- Na Junta de Freguesia de (localização), no (localização), que são fantásticos, e depois têm o centro de dias e essas coisas todas, ligada à Igreja, portanto, desde, portanto, a Diretora que foi a minha casa mais do que uma vez, falar com ela e depois eu levá-la e depois deixá-la lá um bocado…

M- Nunca quis?

P4- Não lhe deu, não serviu para nada… Que o que ela dizia: “Agradeço-lhe muito”, a minha dizia: “Agradeço-lhe muito a sua atenção, mas eu não gosto de estar misturada com gentinha daquela…”

M- A sua mãe gostaria?

P6- Nós já falámos disso, mas acho que a minha mãe ainda não está muito recetiva… Por acaso eu tinha falado nisso com a minha filha e ela também disse que…

M- Estamos a falar do centro de dia…

P6- Centro de dia, em (localização), agora ela ir para o centro de dia é muito complicado devido à mobilidade…

M- É longe, é?

P6- Tem de se descer, uma grande…

M- Ok, tem mais a ver com o percurso…

P5- Mas há alguns que têm carrinhas, transporte…

P6- Agora é preciso que ela queira, porque a minha mãe é muito independente, até uma pessoa que ajude em casa ela a limpar…

M- Também não tem?

P6- Não quer, eu já tentei, já falámos nisso, a minha irmã, por vezes vai lá, há coisas que se vão fazendo, agora a minha irmã também está a ficar doente e temos de falar nisso, sobre arranjar alguém no sentido de…

M- Ok, no seu caso tem alguém que a ajude lá em casa? Não vai lá ninguém?

P4- Não até porque eu tenho um problema também, eu sou [risos] obsessiva nas limpezas…. Estou sempre, estou sempre, não posso uma coisa, estou sempre a arrumar tudo, todos dias, todos os dias… Portanto, ninguém faz as coisas como eu e de antes eu nem ligava a isso, mas antes eu tinha, trabalhei imenso e estava montes de tempo fora de casa e tinha um filho e essas coisas todas, que tenho ainda graças a Deus, mas que já tem, é casado e tem filhos. E pronto, eu faço a gestão de tudo, ela também não gosta de fazer rigorosamente nada, portanto tenho que ser, eu ponho a mesa, às vezes digo: “Ó mãe, caramba, põe a mesa.”, não faz, não quer, não quer, não faz…E quanto faz olhe, sabe o que ela me fez no outro dia? Foi quando, foi a última vez que comeu carne, abriu a conduta do lixo, que é suposto deitar para lá coisas me sacos, despejou para lá o prato com a carne e isso e eu disse: “Nunca mais come carne!”.

M- A P4 está reformada? Hum hum, já agora qual era a sua atividade?

P4- Olhe eu tive várias atividades, comecei, porque sou tradutora técnica, de material eletrónico e automóvel, portanto é específico e depois, entretanto também tive, uma experiência, de, como…como é que se diz? Empresária, tinha coisas, trabalho até não sei onde, ainda tinha o filho em casa e tinha duas pastelarias, uma fábrica de bolos e não sei quê e não sei que mais e um marido que me deu conta da vida toda, dos negócios e que por causa dele que eu fui para lá, percebe? E, entretanto, depois foi-se embora, deixou-me montes de coisas para pagar, que ainda estou a pagar.

M- Foi-se embora…?

P4- Foi-se embora, pronto…

M- Foi-se embora…ok

P4- Mas o curioso disto é que durante 25 anos eu fui a pessoa mais feliz do mundo, foi o tempo que estive casada, era vitrine, fazia todas as vontades, era ... casal modelo… De um dia para o outro, ele era mais velho do que eu, de um dia para o outro começou a mudar, a maneira de vestir, a maneira, se calhar até estou, aquilo já devia ser era Alzheimer…

P5- [risos]

P4- Era só 6 anos mais velho do que eu! [risos] Mas vocês estão-me a assustar aqui muito, sinceramente, vocês as duas estão-me a assustar…

M- Em que sentido?

P4- Sabe porquê? Porque as vossas mães, quando eu oiço falar, eu, dá-me a sensação que as vossas mães têm a minha idade…

P6- A minha mãe tem 87 anos!

P4- A sua tem… e a sua?

P5-Tem 76…

P4- 76 e começou quando com?

P5- Sei, lá! Supostamente tinha uns sessenta e…

P4- É que eu tenho 67!!

M- Diga diga…

P4- Tenho 67!!

M- Hum hum…

P4- E começo a ficar, é a tal história, participar nas coisas, até mais por causa do meu filho, a minha mãe teve e agora eu pensar que também posso vir a ter, ou que o meu filho pode vir a ter, ou os meus netos podem vir a ter, percebe?! É um bocado isso assim…

M- Bem, o que nós, havia um ??…que dizia: “O que nós não podemos controlar, não nos deve preocupar”, não é, portanto, é deixar estar…Está muito bem, já agora no seu caso, o que é faz?

P5- Sou advogada…

M- É advogada, e ainda trabalha no meio desta confusão toda?

P5- É assim, não parei um bocado agora nesta fase que, da minha mãe, para a acompanhar…

M- Hum hum…. Parou quando? Desde há 6 anos?

P5- Sim sim, sim!!

M- Ok, ela agora está num lar, não é…?

P5- Sim, está…

M- Isso, ela está a tempo inteiro no lar ou?

P5- Sim, está…

P5- A tempo inteiro… Talvez de 17 ou 18 de setembro…

P4- E ela aceitou bem?

P5- É assim, não teve muita noção, é assim, teve a noção de que era bastante longe, começou a dizer pelo caminho, e eu farta de chorar porque estava-me a custar imenso, que era muito longe de minha casa porque ela está super agarrada a mim, percebe? E então, tinha a noção que eu estava a levá-la para um sítio muito longe…pronto…e… Mas eu disse que não podia fazer mais, é assim, tentei que ela percebe-se isso, que eu não consegui, é assim, não consegui porque provocou-me um desgaste psicológico muito grande, esta última fase e, é assim, eu estava com ansiedade, pensei procurar um psicólogo, ajuda psicológica, porque é assim, ainda estou um bocadinho… Tenho ataques de ansiedade, de vez em quando, porque é assim foi uma situação muito desgastante…

P4- É muito desgastante…

P5- …. Mesmo horrível! E está-me a custar imenso, mas é assim, é impossível, é assim, é impossível tê-la em casa, mesmo que eu quisesse arranjar pessoas…

M- Eu ia perguntar isso, se tinha ajuda de alguém?

P5- É assim tinha ajuda, e é assim, agora ultimamente, até contratava aquelas empresas, que até, supostamente as senhoras têm formação e na última semana, contratei uma empresa e tive lá, tiveram lá 3 senhoras, para tomar conta dela… Quer dizer, tiveram lá, uma teve um dia, outra teve 2 dias, outra… Assim, porque é assim, e disseram que já tinham estado com pessoas com Alzheimer e não estavam numa situação tão desgastante como a minha mãe, os outros…

M- O que é que fazia com que fosse tão desgastante para elas?

P5- É assim, porque elas, elas, a minha mãe estava sempre a cham.., nao deix.., é assim por exemplo, as senhoras não podiam fazer nada, nem se podiam deitar ao pé dela, quase fazer comida para ela e essas coisas porque ela estava-se sempre a querer levantar, e estava já com mobilidade reduzida e alem disso estava sempre assim: “Eu quero a minha filha, quero ver a minha filha, onde é que está a minha filha?”, e levanta-se para ir à minha procura, percebe? E então as senhoras não podiam sair de ao pé dela, nem fazer nada quase…

M- Ok, se nos pensássemos numa escala de 1 a 10, qual é o grau de dependência da sua mãe em relação a si? De 1 a 10?

P5- Aí, acho que é 10

M- 10. E no seu caso o que é que diria?

P4- 20!

M- 20. E no seu caso?

P6- No meu caso, não é assim tanto, não é? Ela á só mais a nível de logística de consultas e de…

M- De um a 10 é o quê?

P6- 5, talvez, vamos por um bocadinho para cada lado…não está ainda neste…caso…

M- Ok…ok…

P4- E ainda sai, às vezes… A minha mãe, quando foi para minha casa, eu e o meu filho ainda conseguimos levá-la ao restaurante, eu tenho carro e não consigo, eu vejo-me doida para a meter dentro do carro, e depois quando vai no carro, se a pessoa a levar a um restaurante…O meu filho deixou completamente de a levar a um restaurante… “Esta porcaria não se come nada de jeito aqui, e não sei quê!” [risos]…E diz estas coisas assim…

M- Mas eu estou a pensar, para voltar ao seu caso, que é 20 em 10, não é? Como é que faz, por exemplo, agora está aqui, como é que se desenrasca?

P4- Porque ela, aí está, é que ela apesar de tudo, não é daquelas pessoas que goste de ir para a rua, nem quer ir, percebe? Não quer ir, não quer ir para lado nenhum, quer estar ali, quer estar ao pé de mim, percebe? Mas ela entende que eu tenho que ir as compras, que eu que ir não sei, se não, não comemos, não é? E mesmo assim já me vão levar lá muitas coisas a casa…

M- Ok

P4- E como ela se entretém muito a ver televisão, outras vezes vai dormitando, outras vezes não sei que, hoje por exemplo, foi dormir a sesta porque já estava a dormir no sofá, não é? E então pronto, tenho que ter o lanche preparado e não sei quê, se se lembrar come, se não se lembrar não come, também não faz mal nenhum…. Também comeu lindamente ao almoço, eu estava lá, percebe?

M- Deixei-me fazer uma pergunta que também fiz no outro *Focus Group* que é, se nos pensarmos no dia típico, o que é que um dia típico para si, o que é que era, quando estava com ela, não é? E se calhar, o que é que é, hoje em dia, também é interessante de ver e também, para si se calhar é um pouco diferente, o nível de dependência é 5, é diferente, mas também gostava de ouvir de qualquer modo. O que é que é um dia típico para si?

P4- Um dia típico para mim, começa não muito cedo, porque ela não se levanta muito cedo, e eu também não me levanto muito cedo. Já lhe explico porquê no fim do dia…

M- Ok…

P4- …E então, depois é sempre, sempre sempre a correr…

M- Cedo é o quê? 9 horas?

P4- Não, 10, 10 e tal…

M- 10, ok…

P4- Ah, depois tomamos o pequeno almoço, eu faço o dela, dou-lhe os comprimidos e essa coisa toda…

M- Ela come autonomamente? Come tudo?

P4- Ah, ultimamente tem sido assim um bocado, ela comer come, mas já a vi comer esparguete com a mão, ovo estrelado com a mão, não pode comer isto aquilo e o outro, mas por exemplo, adora alheiras com batatas fritas e ovos estrelados! [risos de todos]

M- É esperta!

P4- Por acaso eu não de nada disso, eu não gosto de nada disso!

M- Eu gosto!

P4- Mas ela gosta porque faço só para ela! Depois tomamos café a meio da manhã, eu faço Nespresso e levo-lhe a ela também, à sala, com um pratinho ponho: “Mãe está aqui o café”, “Muito obrigada!”. Continua a ver a televisão, levanta-se, a chávena fica sempre lá…

M- E, entretanto, a P4 vai fazendo as coisas da casa?

P4- E entretanto, eu vou fazer, se tiver que ir às compras, é mais rápido ali ao pé, quando é mais longe, isso já tenho que, portanto, programar as coisas de outra maneira…Se for ao supermercado, não vou demorar o mesmo tempo que ir à loja ali na rua…

M- Claro…

P4- Portanto, depois faço o almoço, pronto, ponho a mesa e essas coisas todas, arranjo-lhe a comida toda, discutimos o que é ela quer almoçar…. Que é…

M- Ela discute consigo as preferências…

P4- Não, não! Eu é que lhe pergunto, porque se não, não sei o que é hei de lhe dar, percebe?

M- [risos]

P4- …E se eu lhe dou alguma coisa que ela não quer, ela não come, nem morta! [risos] E então…

M- Há aí um processo de negociação, não é? Tem de estar sempre a negociar…

P4- É! Nós falamos muito, apesar de tudo falamos muito… Quer dizer, às vezes, desconversamos, que ela baralha tudo, mas por exemplo, ela queria sopa, e eu faço-lhe a sopa toda passada, porque é a melhor maneira de ela a comer, e ela disse-me: “Estas porcarias de sopas que tu fazes não são nada daquilo que eu gosto, eu gosto de sopa! Sopa de feijão com couve e com não sei que, e com não sei que mais, e não como estas sopas passadas”. E eu passei a fazer isso, e ela começou, dei-lhe a sopa, ela comia o caldo e o resto ficava tudo e as couves em baixo! [risos] Voltámos às sopas passadas [risos], mas aí ela já não refilou, já percebeu!

M- Isso é o almoço e depois?

P4- Depois, o almoço, depois de almoço, portanto, eu arrumo as coisas ela vai logo para a sala ver televisão e eu aproveito para fazer algumas coisas em casa, se tiver algum coisa para comprar, também vou comprar, se tiver que sair saio, para ir ao médico ou qualquer coisa do género porque eu tenho muitos problemas, tenho consultas médicas com muita regularidade e tenho que ir e ela fica muito bem…portanto…

M- E ela fica sozinha nas consultas também? Quando a P4 vai às consultas?

P4- Sim, não tenho problema nisso, eu explico-lhe que vou à consulta com a médica, mas a minha mãe não é pessoa de fugir de casa… Ela não gosta é de ir à rua, é o contrário!

M- É o contrário…

P4- É curioso…

M- Mas isso é uma questão interessante que é, ela não gosta de fugir de casa, mas a P4 fecha a porta à chave?

P4- Não!...

M- Ela tem acesso à saída…

P4- Sim, mas não vai, não abre a porta, ela nem gosta, nem de atender telefones nem nada disso…

M- ok…

P4- Aliás, também não vale a pena porque ela não sabe fazer uma chamada telefónica já, aliás quando veio para minha casa já foi assim um alerta incrível que eu tive, que foi das coisas que mais me chocou, é que não havia telefones e televisões que durassem muito tempo e isso fazia-me imensa confusão, e então comprei um telemóvel e num papel, fiz o desenho do telemóvel e com setas e assim, que ela nessa altura lia bem, agora ainda consegue ler algumas coisitas, mas não lê muito bem, aquelas grandes da televisão, e então, fiz aquilo com um setinhas e neste carregas, olhe, o drama começou nisto, carregas, mas não coube todo no papel, ficou carregas, “carre” tracinho e do outro lado “gas”. [risos]… Ela ainda não vivia comigo nessa altura, mas eu ia lá, portanto, com muita frequência, e a um sábado chegou lá, ela estava furibunda, furibunda! Meti a chave à porta, “Estou aqui cansadíssima que nem posso! Deste manhã, desde que me levantei que não faço eu outra coisa se não meter se não meter gás no telemóvel” [risos]. Como?? “Ó mãe, mas o que é que fazes?”, [sopros], [risos de todos]. Está a ver? Tem graça agora, agora tem, mas na altura não tinha…

M- E depois à noite?

P4- E depois à noite, portanto, é o jantar, que à noite temos muita pena, mas é só sopa e sanduíche, batidos, batidos com abacate, que faz muito bem às pessoas com alzheimer, iogurte, leite, fruta, tudo misturado e uma sanduíche e isso, pronto! Raramente come alguma coisa, de, e sopa, mas não come assim de prato de comida. Se tiver vontade e se deitar mais tarde, que agora já se vai querendo deitar mais cedo, é capaz de comer qualquer coisa antes de ir para a cama, mas é só!...

M- E vai-se deitar a que horas?

P4- Que ela agora já vai deitar, o mais tardar 10 horas… Se eu a deixar ficar, por exemplo assim até às 11, ela fica, mas fica a dormir na sala e eu, então, quero que ela vá para a cama…E ela vai… Depois…

M- Dorme no quarto dela?

P4- Sim! Quarto dela…Ela dorme no meu quarto, porque eu vivia sozinha e tenho um T1, só que o quarto é enorme e temos camas separadas e articuladas, tanto ela como a minha, temos camas articuladas, para ela, eu já tinha uma cama dessas quando vivia sozinha e depois acabei por passá-la para o meu filho e comprei uma para cada uma, mas ela vai, dorme sozinha, quando eu chego ao quarto já está a dormir… Porque eu depois deito-me tardíssimo, porque passo o tempo todo a fazer sudoku, a pesquisar na NET (internet), isto aquilo e o outro, e principalmente a não ouvir barulho…

M- Ok, descansar…

P4- Sim! É! Eu preciso daqueles momentos para mim, sem barulho…

M- E daí acordar depois lá, por volta das 10… Ela não acorda mais cedo?

P4- Se ela acordar mais cedo e vir que eu estou a dormir, das duas três, ou faz os possíveis para me acordar, vai ligar a televisão aos berros, ou faz barulho com as portas ou então, olha para mim, que foi o que ela fez hoje, e deixa-se ficar na cama e adormece  outra vez…

M- E nós? É P5, não é?

P5- Sim, eu dia típico era levantar, é assim também de ir para a Associação (nome) e para o centro de dia, também não se levantava muito cedo… Mas ainda tomava banho sozinha, mas depois havia a questão da roupa que todos os dias, me pedia para ir por a roupa para ela vestir, não sabia, e às vezes já, tinha muita dificuldade em vestir-se, as calças ou a camisola, a abotoar ou essas coisas, e depois a seguir, a ansiedade, estava sempre com uma ansiedade era de, tinha de tomar banho e vestir-se quando se levantava, eu é que dizia: “Não, vais tomar o pequeno-almoço, tomar os comprimidos e não sei quê”. E depois ali, não tinha assim, eu dizia para ela fazer certas coisas e ela não, o se metia a ver televisão, mas aí já acho que ela nem sequer ligava a nada, nesta última fase. Mas pronto, já nem punha a mesa nem nada, que ela tinha a tarefa dela lá, era por a mesa ou às vezes tirar a loiça da máquina, mas isso ela já não conseguia, ela ultimamente, e pronto eu fazia as refeições e ela estava assim. Eu até tenho um terraço enorme e não sei quê, e às vezes ela ia para o terraço apanhar sol, porque tinha a mania de apanhar sol, mas tipo estava assim, tipo 2 minutos e vinha para casa: “Aí agora já não quero…”. Sempre muito instável e depois lá ia outra vez, e depois vinha… Andava assim tipo a tarde toda ou parte da manhã e depois à noite, jantava e começava logo a dizer que queria ir para a cama, e depois era o problema do pijama, ou da camisa de dormir: “Eu não sei onde é que pus, onde é que está o meu pijama?, “Onde é que está a minha camisa de dormir?”. E depois estava ali um bocadinho com os meus dois filhos mais pequenos e a brincar ou pronto, eles estavam ali com ela e faziam-lhe perguntas ou isso, e depois ela dizia que eles não apagavam a televisão, e era assim um bocadinho… Mas estava ali, o problema dela sempre à noite era: “Onde é que está a minha camisa de dormir?” e ela acho que continua com isso porque eu quando fui visitá-la, eram para aí umas 4 da tarde e ela estava a perguntar: “Onde é que é o meu quarto?”, “Onde é que eu vou dormir?”, “Está lá o pijama?”, “Está lá a minha camisa de dormir?”… Ainda continua com essa…. Estava sempre com aquela preocupação…

M- Ok ok…

P4- Mas isso a minha também é igual, só que a minha, eu tenho de fazer isso, porque ela chega aos meus roupeiros…

P5- Sim, remexem tudo!

P4- Chega aos roupeiros, tira a roupa toda…

M- Cá para fora? Hum hum

P4- Cá para fora, desarrumam tudo, deixa-me doida, que sou picuinhas e então tem de ser assim…

P5- Pois, isso desorganizava tudo e depois até há uma altura, ela depois de ser operada tiram-lhe os brincos e nunca lhe pus os brincos, nem a aliança, nem nada, que ela continuava a usar aliança e tipo as pulseiras, andava sempre com umas pulseiras de ouro e sempre com montes de colares e eu a dizer-lhe: “Tu aqui em (localização) não podes andar com estas coisas”, e entretanto se desaparecia alguma coisa, como ela não sabia já onde é que punha o relógio, ou não sei quê, dizia que eram os meus pequeninos, os filhos mais pequenos que lhe tinham mexido, ou assim… Mas não é nada, é ela que já, claro que não sabia…Mas o relógio era todos os dias, não sabia onde é que tinha posto o relógio, às vezes tinha que a ajudar a por o relógio, os óculos também, mas entretanto ainda consegui fazer-lhe uma operação os olhos, a um dos olhos porque ela via super mal, neste…Em agosto…

P4- O relógio, os óculos…

M- E no meio disto como é que encaixava a sua vida como advogada? Conseguia ir fazendo algum trabalho lá em casa ou algum trabalho fora de casa?

P5- Sei lá, às vezes fazia, só que era muito complicado, era muito desgaste, foi um desgaste muito grande… Porque é assim, quase deixei de ter vida, não é? Apesar de, até a levava de férias, o ano passado, e eu começo a pensar, portanto, a pessoa depois começa a pensar, até a levei de férias o ano passado, mas depois tirava sempre tipo uma semana ou duas para ir sozinha com o meu marido, porque isso sempre fiz, independentemente de tudo, mas era, foi um desgaste porque condicionava, apesar de ter empregadas e não sei quê, condiciona sempre a vida da pessoa, condiciona imenso!

P4- Por isso é que ela que me disse a mim que queria por uma empregada lá em casa…

M- Condiciona, esse aspeto é importante para nós, condiciona, já percebi, há aqui um acompanhamento muito regular, não é? Mas isso inviabiliza, por exemplo, fazer algum trabalho em casa ou, condiciona de que formas?

P5- Sim! Condiciona, não é, em casa não tanto, mas condiciona  a vida familiar, condiciona a pessoa de, eu vou-lhe explicar, por exemplo, a minha filha vivia em (localização), depois foi para (localização), é assim, eu para ir visitá-la tinha de arranjar alguém sempre para ficar aos fins de semana lá, que não tinha pessoas, pronto ao principio não tinha ao fim de semana e tive de arranjar, essas empresas que vão e contratar para ela, para estar com a minha mãe, quer dizer, não podia estar a sujeitar o meu marido a ficar com a minha mãe, não é?

P4- É muito complicado…

P5- É complicado essa situação e condiciona muito, porque a pessoa ou quer ir a algum lado, de repente, e pronto…Apesar de, às vezes também, essa situação do restaurante, de levar, eu leva-a ao restaurante, ela até se portava super bem, no Natal com a família do meu marido e não sei quê, foi assim, de repente… Não tinha essas, essa situação de falar mal nem nada disso, até se comportava super bem até junho!

P4- Mas a minha mãe antes não dizia nada, era uma pessoa que…

P5- Eu já estava a notar que havia uma decadência, um agravamento da situação tipo a partir de janeiro, mas tipo, a partir do momento em que ela partiu o colo do fémur é que foi, foi mesmo…

M- Acelerou?

P5- Não sei, foi mesmo super! Agravou mesmo, mesmo, mesmo!...

M- Ok…

P4- Eu acho que é muito mais difícil este caso do que o meu…

M- Em que sentido?

P4- Em que sentido, porque é assim, eu estou sozinha, pronto, não estou, estou com ela, mas eu já vivia sozinha, portanto, quando a trouxe foi uma opção, o meu filho foi contra, a minha nora foi contra, mas foi o que eu escolhi, foi o que eu decidi. Mas eu também, por exemplo, se tivesse o meu ex-marido em casa, eu não sei como é que iria ser, mas de certeza que ela não estava lá, porque ou queria ir ao cinema, não é? Nós tínhamos casa em (localização), porque tínhamos também barco e não sei quê e queria ir para baixo, de fim de semana, e levá-la não, porque ele gostava de ir… São coisas que nós, como casal, nos habituamos a fazer, percebe? Por isso falo, não tenho agora casal, não é? Mas entendo perfeitamente, ainda é mais difícil para ela do que para mim!

M- Portanto, essa negociação. Ok, bem observado, portanto, a negociação também com o resto da família torna-se muito complicado, não é?

P5- Sim! Não, apesar de me terem acolhido bem o facto da minha mãe vir viver connosco…

P4- Sim! Mas começa a chegar a um ponto…

P5- Para já…, mas também é assim, eu também associei, independentemente da doença, chega ali uma pessoa, aí… “Vai para ali…”

P4- Vai para o lar…A minha não ia para um lar, nem morta…. Tem medo!

P5- Antigamente as pessoas viviam todas em casa umas das outras, sei lá, às famílias, os tios, avós… E há agora um bocado, pela sociedade, porque as pessoas todas trabalham e não sei quê, mas também há um bocado, o despejar da família, e as pessoas, não há contacto e eu acho que isso também e importante! Haver contacto!...

P4- Por isso é que a minha ainda está comigo…

M- Tem medo?

P4- A minha mãe tem pavor aos lares, ainda agora houve uma coisa qualquer na televisão sobre um lar, e ela: “Estás a ver? Estás a ver?” …Portanto…

M- No seu caso?

P6- No meu caso, é assim é muito, muito monitorizado à distância, não é?

M- Tem o…? À distância…. Estamos a falar de monitorização também com imagem ou vídeos?

P6- Não, isso eu não tenho…Ela usa o telemóvel ainda, apesar de às vezes já andar ali perdida: “Não encontro o número do tal; Quero falar para tal pessoa, e como é que está…”, e o meu sobrinho teve um acidente grave de mota à pouco tempo e ela queria ligar, vamos supor: “Não encontro o número do Jorge, o que é eu faço?” e é preciso explicar-lhe tudo. Noto que ela está muito com mais sono, com um grau de agressividade maior, com uma diminuição de apetite, mas vamos supor que ela vai, ou está com a minha irmã, que habitualmente ela vai aos fins de semana, um fim de semana para a minha irmã, outro vai ter comigo, é porque é um bocadinho controlada, é o acordar, é “O que é que já comeste?” , “Já tomaste os medicamentos?”, “Vá não sei quê”, “então e vais onde?”,  “Vais à farmácia? Mede a tensão…”. E ali todos têm o meu número, o do restaurante tem o meu número, pronto, ou o da minha irmã, há este: “Onde é que estas?”, há sempre, sempre este…pronto!...

M- Este, obviamente estão em fases muito diferentes, não é? Em situações muito diferentes… No seu caso, com é que organiza o seu dia? Tem um bloco de dia que é o trabalho, não é? Fora o trabalho quando tempo é que dedica por dia, se é uma coisa diária, se é uma coisa…é diária?

P6- É diária, claro que é diária, é diária… Ainda por cima ela há pouco tempo ela teve de ir à urgência porque fez uma alergia possível alergia ao antibiótico e pronto, tem de ser muito…

M- Ok ok …

P6- Mas há mais, ela tem muito mais afinidade talvez pela minha irmã, pelo facto da minha irmã, também estar no mesmo registo que ela, “Coitadinha da (nome da irmã)”, e não sei quê, aquele registo, aquele fio que elas as duas mantêm e vão-se aproximando, apesar de também discutirem muito uma com a outra [risos], há sempre aquela discussão… Também noto, por exemplo, com a minha filha de 20 anos, “aí a avo está uma chata!”, “(filha da cuidadora), percebe, a avó tem a doença que tem, tem 87 anos e precisa de falar e se lhe deres um bocadinho de atenção e como a avó para ti, foi ela que te criou, há um laço grande de afetos” e também com a perda do avô, também se notou muito, eles tiveram 62 anos juntos…E então... Eles discutiam, ralhavam, mas estavam sempre lá, não é? E então há aquela ligação de afeto, que houve agora aqui esta grande quebra, mas noto perfeitamente bem que não tem muita paciência para avó, não é? Mas se ela estiver com a avó, é capaz de lhe pintar as unhas e vêm a novela juntas…

P4- A minha também, tem 4 anos, só que depois diz que aquilo não fica e não fica…

P6- Não! A minha filha pinta à minha mãe, a minha filha é que pinta à minha mãe…

P4- Pois! A minha neta é que pinta à minha mãe, que tem 4 anos…

P6- “Ó (filha da cuidadora), vai para a casa da avó, nem que fiques lá só uma noite, porque isso é estares com ela, é…”, pronto, mas ela pronto…Esta situação, depois também o ir para minha casa, ela também não se sente bem, anda.. “fique, às vezes, cá a dormir”, no fim de semana ou…

CM- Ela não fica ao fim de semana? Ela vai e volta?

P6- Ela vai e volta, ela não quer ficar lá, “Mãe ficas cá, dormes cá…”, pronto, também não tenho condições, ou ela ia dormir comigo, mas ela já percebeu que o dormir comigo, eu não dormia, não é? Ou ela dorme na cama da minha filha se a minha filha não estiver, mas ela acaba por não querer, porque quer estar na casa dela. Lá está é…

M- É manter a autonomia dela…

P6- É que só está bem onde não está!

P4- Aí, é um bocado isso!

P6- Se vai para a casa da minha irmã passar o fim de semana que é, ela tem uma casa fora, é “Porque aqui é uma chatice!”, “Oh mãe mas aproveita, aproveita, é ar puro, aproveita o lado bom!”, pronto, e depois está bem…Há dias que está muito bem, há outros dias que já não está bem…Há sempre então, é o “Coitadinha”, a vitimizar-se… “Percebe que ela deve ter muitas dores mesmo!” Estas alterações agora, tem mais da coluna e da anca e a mobilidade dela está a dificultar muito a vida dela, não é? Agora eu estou muito receosa, estou, e sei que a família neste momento…A minha irmã disse, resolves tu, o que tu resolveres está bem…E eu disse: “Não, não sou eu, somos nós que temos de arranjar uma coisa boa para a mãe! A mãe não pode ficar bem ali sozinha, não é?” Eu tenho medo de tantas asneiras que percebo que ela possa começar a fazer, não é? E isso, torna-me, também temos a vizinha de baixo da minha mãe, no primeiro andar, que pode, ela no outro dia fartou-se de vomitar, ela não ouviu, pediu ajuda, ela não ouviu…. Pronto, quer dizer, é sempre um bocadinho…

M- À distância ainda é mais difícil…

P6- Muito! E ela não quer, já foi ver, outra hipótese de ir, pronto, falámos em ela ir para o centro ou assim mas ela não quer, não quer e diz que está muito bem e que não se baralha e que vai às compras e ainda sabe contar o dinheiro e sabe? Vamos saber se é verdade? Não sabemos…

M- Ok…

P4- Nesse aspeto a sua mãe está muito mais desenvolta do que as nossas, não é?

M- Hum-hum…. Claramente, não é? São de facto outras fases, não é?

P6- Sim, sim!

M- Mas com preocupações diferentes, mas estão lá as preocupações…. É um pouco isso…

P6- Claro!...

M- Se pensássemos em termos, que é um tema sempre mais chato, mas que é um tema importante para a CM, que é custos, se pensarmos em termos de encargos, como é que tem sido isto? Porque no seu caso tinha de contratar empresas, não é? Que ajudassem, pessoas, …

P5- Sim…

M- A P4 não tem feito, não tem, com a sua neta, com a sua neta?

P4- Isto, não, não é com a minha neta… [risos] Isto é uma malandrice que eu fiz, mas não é com a minha neta…. É com o meu neto! Olha fugiu do sítio!

M- Mas a P4 tem, a P4 não tem tido encargos com pessoas, não é?

P4- Tenho tido encargos com pessoas e tenho muitos encargos, que a minha mãe só de medicamentos e eu então…. É um ver se te avias… Mas eu tenho ajuda…

M- Em que sentido?

P4- Tenho ajuda porque tenho um filho… Por exemplo, eu vou ser operada para a semana a um carcinoma, o meu filho só de pensar nisso fica logo em pânico, e vou no particular e não sei quê, pronto… Eu tive um acidente, vinha de casa do meu filho, tive um acidente, o carro ficou todo espatifado e eu fiquei toda espatifada, parti o externo, parti o braço, etc… A companhia de seguros pagou, mas o meu filho pagou muito, muito mais!...

M- Ah, tem ajuda financeira, ajuda financeira, era o que estava a dizer…

P4- Sim ajuda financeira, de resto nada disso! De resto quem tem de ter ajuda são eles, [risos], com os miúdos e os meu netos vieram muito tarde, o meu filho tem 46 anos e a minha nora tem 45 e ele tem 2 anos e a miúda tem 4… Portanto, não sabe… Nem têm muito jeito para ser pais e pronto, eles gostam que os miúdos estejam comigo. A minha nora, por exemplo, se for jantar, tiver um jantar ou de trabalho ou de qualquer coisa assim, o meu filho nunca tem horas de vir para casa…

M- A P4 fica com a rapaziada?

P4- E eu tenho que ir lá pô-los, levar para casa, mas nessa altura, aí eu já vou sempre quando a minha mãe já está a dormir, percebe?

M- Ok, P5, como é que é, no seu caso, é como é que tem sido, não é? A evolução de custos?

P5- É assim, eu vou-lhe explicar, é assim desde que a minha mãe, nesta situação que a minha mãe foi operada, tive de contratar empresas e isso, gastei para aí uns 5000€…

M- Em quanto tempo?

P5- Em 3 meses para aí, porque a minha mãe, é assim, tem possibilidades, era professora e o meu pai era juiz e tem a pensão dele…

M- A pensão dela, hum hum…

P5- Dela e dele, mas é assim, mas uma pessoa que não tenha, como é que faz? Não é?

M- É, eu…

P5- Eu acho que isso está muito…. É assim e depois telefonei para a Associação (nome) e é assim, e há uma no (localização), e depois não deve estar, deve estar a começar agora a atividade, não é? E depois não devem estar nada organizados porque não me souberam quase dar resposta nenhuma, depois fui pesquisar mais, telefonei para um número que pensei que fosse um número que pertence ao estado e afinal é um número do Porto, uma associação do Porto, e também me disseram: “Olhe é assim, se a senhora estivesse aqui nós podíamos ajudá-la”… Depois lá consegui falar com uma pessoa, que teve a irmã com a doença muito nova e que me explicou, pronto, e depois que já tinha ouvido a legislação que vai entrar em vigor em Janeiro e não sei quê, e a senhora disse: “Aí a senhora tem que se inscrever e não sei quê, ir ao centro de saúde….”

M- Mas isto para quê?

P5- Para ter alguma ajuda, não se era a nível financeiro, eu penso que a nível financeiro, acho que são cento e tal euros que dão ao cuidador, é o estatuto…

P4- Eu nem percebo nada disso…

P5- E além disso, mesmo para ajudar, por exemplo, para eu pedir uma ajuda para a minha mãe, eu depois não pesquisei o resto, porque tinha que ir ao centro de saúde para me informar mas acho que ainda vou, acho que, pelo que a senhora me disse, acho que tem que se ir à medica de família e pedir ajuda à assistente social e não sei quê e então acho que só dão, davam tipo ajuda por um dia, ia lá alguém tomar conta da minha mãe durante só um dia, não eram vários dias, era um dia… Quer dizer, acho que isto é inadmissível…

P4- Normalmente vão é para dar banho ou assim…

P5- Sim, isso pode pedir às paróquias, eu também tenho isso, em frente em minha casa tenho um centro e sei que vão…

M- E nunca recorreu a isso alguma vez?

P5- Não recorri porque é assim, nem pensei nessa situação, é assim como eu tinha possibilidades, mas acho, eu acho que mais, claro que essa parte é super importante para as pessoa que não podem, claro que tem que haver ajuda, mas também acho que tem que haver uma ajuda a nível psicológico para as pessoas, para o próprio cuidador e que não há! É isso que eu…e foi isso que eu tentei arranjar para mim, quando a minha mãe saiu, quando a pus na residência, foi ajuda para mim porque acho que criou-se ali, se calhar foi um vazio, mas também que foi uma pressão psicológica durante tantos anos e então esta ultima parte foi muito mesmo…

P6- Deixe-me só fazer uma pergunta, tem o atestado multiusos da mãe?

P5- Não…

M- Atestado de?

P6- Multiusos…

P5- Pois essa parte, foi isso que eu ia pedir, sabe porquê?...

P4- De quê?

P6- Multiusos…

P6- É um atestado de incapacidade, a mãe já tem há muitos anos…

P4- A minha mãe não, eu nunca tratei de nada disso…

P6- Pois, é com o delegado de saúde…

P5- Sim…

P6- Tem de levar relatórios médicos, o medico de família faz um relatório, o hospital faz um relatório…

P5- Não, mas eu até podia levar um relatório só da Professora D porque acho que serve, porque o meu filho o… tem esse…eu vou ali ao centro de saúde, marco com a médica…

P4- É que a minha mãe tem o relatório da Doutora D …

P5- Sim! Eu estava a tratar disso, queria tratar disso para a minha mãe, mas pronto, essa situação agravou-se tanto que já não…

M- Qual é a vantagem?

P6- A vantagem, tem isenção de… No hospital, a minha mãe tem isenção…

P5- Mas a minha mãe também tem porque a Professora mandou, teve logo a Professora D... E eu apresentei ali o atestado e a nível dos hospitais não paga nada…

P4- Sim isso tem…

P6- Pois, mas nível, a minha teve o atestado multiusos pronto e é vitalício não é…

P5- Pronto, e dá para o IRS (imposto sobre o rendimento das pessoas singulares) e não sei quê, não é?

P6- Sim…

M- Portanto…

P5- Para o IRS (imposto sobre o rendimento das pessoas singulares) é que acho que resulta imenso, pois não há, não sei se há…

P4- Eu faço IRS (imposto sobre o rendimento das pessoas singulares) mas não ponho lá nada…

P6- A mãe tem imensas consultas, imensas coisas assim…

P5- Mas as consultas é aqui nos hospitais eram todas grátis e a minha mãe tem ADSE (instituto de proteção e assistência na doença) também não pagávamos muito… Mas pronto, tem razão nisso, mas eu sei por exemplo, a minha mãe, a minha tia também foi diagnosticada com Alzheimer, a minha prima foi com ela e já lhe deram, mas só tem a nível de… do IRS (imposto sobre o rendimento das pessoas singulares) e acho que tem direito tipo a um carro, um dístico, não pagar aquele imposto dos automóveis… Até é assim duzentos e tal euros ou o que é… E mais nada, mas também a minha mãe não conduz, é assim, cortei logo, não conduz, deixou de conduzir logo no início, também isso aí não se justificava, mas acho que aí tem ajuda, mas qualquer pessoa com um grau de deficiência tem isso… Tem essas benesses a nível de …

P6- Sim isso sim!...

M- E no seu caso, já tem encargos e sacríficos acrescidos?

P6- É difícil, a mãe , a mãe pronto com o falecimento do pai ficou com, pronto, uma boa pensão e ela pronto, controla apesar de ser uma grande luta desde que o meu pai faleceu e há muita luta a nível de dinheiros e que eu já me insurgi e não estou, não acho bem a pensão ir toda para a mão da minha mãe… Porque é algum valor e sei, não sei o que é que a mãe faz com tanto dinheiro e acho que ela vai fazendo as compras dela, mas acho que há ali coisas que…E é pesado a nível de terapêutica, são muitos…

M- É ela que por exemplo financia, a terapêutica é comprada com esse dinheiro da pensão?

P6- É, e é ela que quer organizar tudo…

M- Ok…

P6- …E eu já falei nisso com a minha irmã e foi uma zanga, porque há coisas que eu não concordo e acho que não é estar a tirar capacidade à mãe, mas a gente tem que ter a noção da realidade do que se está a passar, não é?

M- Porque há dinheiro que se perde…?

P6- Eu penso que sim…

M- Claro…que é uma coisa interessante porque é um custo que não é contabilizado que é o dinheiro que, já vimos isso no outro *Focus Group*, que é o dinheiro que se perde por pessoas aproveitarem-se da situação, por falta de organização do próprio…

P5- Sim sim…

P4- No meu caso não acontece isso…

P6- Deixe-me só dizer uma coisa que eu noto, a minha mãe disse: “Se vier aí algum assaltante eu tenho de ter algum dinheiro para lhe dar!” [risos] É bestial, não é?

M- Para lhe dar! [risos]

P4- Olhe a minha teve outra coisa, mas isso era outra fase…

P5- Mas isso há uma possibilidade de se quiser interditar a pessoa…

P4- Não, mas nessa fase…

P5- Pode interditar porque agora até é mais fácil, a partir de janeiro, deste ano que vem, é mais fácil, estas pessoas têm de ser interditadas mesmo…

P4- A minha mãe, uma vez, abriu a porta…

P6- Interditadas, é tão difícil, peço desculpa…

P5- Não é não, não é porque há uma lei nova que saiu, mesmo por causa destas pessoas com demências…

P6- Mas em que é que isso é uma mais-valia para eles? Não é mais-valia nenhuma para eles…

CM- Também depende do grau de…demência que estamos a falar…

P5- Sim, depende do grau, sim, é porque eles não são responsabilizáveis por muitos atos…

P6- Sim, mas tenho um primo que é psiquiatra e ele tentou com o pai que já estava a fazer muitos estragos e é o que ele me dizia, não é?...

P5- Mas há que acautelar certas coisas, é assim, eu por exemplo, a minha mãe logo no início fez-me uma procuração de vários poderes para mim…

M- Ok ok

P5- Porque há que acautelar certos, certas situações…

M- Isso é interessante, não é? Porque…

P5- As pessoas não pensam nisso, mas é necessário!

M- A P5, falou do psicólogo, não é? E a figura de um jurista é menos falada, não é? No caso da P5 obviamente não é necessário porque tem essa for.., essa competência… Mas se calhar também faz sentido, não é? É um pouco o que está a dizer, ter apoio jurídico para estas coisas…

P5- Sim…. Sim…eu acho que sim, jurídico e psicológico para nós, e também para as pessoas que não têm essa…. Jurídico também nestes casos, porque é necessário tomar…

P4- Eu por exemplo, há muito disso que eu não sabia, eu não tenho feito nada, em relação, faço o IRS (imposto sobre o rendimento das pessoas singulares) da minha mãe, faço o meu IRS, mas não ponho lá nada dessas coisas de tem alzheimer, se não tem…

P5- Mas isso é preciso ter o atestado que a senhora está a dizer… A P6, não é?

P6- …sim…

P5- De multiusos, tem que pedir, tem que ir ao centro de saúde pedir uma junta médica…

P6- Ao delegado de saúde, ao delegado de saúde… Tem de pedir um relatório aqui em (nome do hospital) com a Doutora…

P4- Mas é a Doutora D…

P6- Então …

P5- Peça uma declaração…

P4- Eu tenho uma declaração dela…

P6- Tem de pedir uma consulta no delegado de saúde, o delegado de saúde vê a mãe, analisa a mãe e…

P5- Mas ali em sete rios, eles ali não é centro, eles lá fazem a mesma coisa…

P4- Aí, mas deixe-me perceber, desculpe lá, isso dava-me imenso jeito, é assim, posso escrever aqui, não posso?

M- Força…

CM- Claro, isso é para si…

P4- Eu gosto de escrever…

P6- Aquilo foi na altura, eu penso que seja ainda assim…

P4- Portanto, ela tem a Doutora D e tem a médica de família que é um zero! A médica de família dela só passa medicamentos…certo?

P6- Tem de ser um atestado, tem de ser um… Mas deixe-me explicar, é assim, tem de ser relatórios com tempo útil, ou seja, não pode ter mais de 6 meses, penso eu, mas o delegado de saúde pode informá-la convenientemente…

M- O delegado de saúde… Que é no centro de saúde?

P4- E o que é isso?

P6- O delegado de saúde… Eu lembro-me que fui com o meu pai quando já estava, pronto, doente, e a Doutora de lá, a delegada de saúde que até achei uma pessoa super humana, ela estava furiosa: “Como é que me trazem doentes de ambulância para eu passar o atestado multiusos!” e ela lá foi para dentro da ambulância passar o atestado multiusos, está a ver? Como é que isto funciona? Isto é, você vai ao delegado de saúde…

P4- Portanto, e o delegado de saúde é onde? É no centro de saúde?

M- É no centro de saúde…

P5- É no centro de saúde…O centro de saúde parece que diz que é uma junta médica, eu com o meu filho foi assim, e depois leva o atestado ao pé da Professora e elas depois dão a percentagem que acharem e depois têm de levar esse, uma cópia do atestado para as finanças para eles porem lá a percentagem de incapacidade…

M- Portanto, também é preciso apoio contabilístico, não é?

P5- Sim sim…

P6- Às finanças, mas eu não fui às finanças…

P5- Então é porque não esta a fazer isso no IRS (imposto sobre o rendimento das pessoas singulares), porque eu sei porque o meu filho foi assim… porque ele tinha para aí 4 anos na primeira vez que o levei e tive que ir às finanças entregar a declaração, o atestado multiusos e agora em janeiro deste ano fui outra vez com ele e tive que ir às finanças levar…

M- Portanto, falta dar esse passo, não é? Falta dar…

P6- Pois, se calhar é… Como é vitalício…

P5- Aí depois, aquilo fica lá registado e desagrava o IRS (imposto sobre o rendimento das pessoas singulares) …

M- Pois, estas coisas são, eu acho interessante, já ontem aconteceu isto, que é, nós estamos aqui há uma hora e vocês estão a aprender uns com os outros…

P4- É, é…

M- Não há espaços destes? É que estamos a falar…

P5- É que não há! É que não há!...

P6- Não há…

M- A P4 já vive com esta situação há muito tempo, a P5 a mesma coisa, a P6 também embora de uma forma um pouco diferente. Não há espaços destes em que troquem cromos?...

P5- É assim, eu ia lá ao (nome associação), mas as pessoas…

P4- Olhe, mas eu digo-lhe sinceramente, eu aqui vim porque é uma coisa que está ligada com a Doutora D e não sei quê, Doutora J, e eu, já falámos sobre isso, mas quer dizer, esse estilo de encontrozinhos para eu perder tempo e para estar a meter estas coisas na minha cabeça, eu aqui venho de bom grado…

M- Prefere não ir…

P4 –Agora só conversa de ta ta ta ta ta, isso não me interessa nada…

CM- Eu acho que o que a P5 ia dizer era o (nome do evento), não é? Da (nome da associação)…?

P5- Não eu deixei de ir ao (nome do evento), mas por acaso eu depois era para ir porque depois até essas empresas que foram lá a casa, uma senhora acho que ela trabalhou, devia ser assistente social ou qualquer coisa e trabalhou na (nome da associação) e disse, é que me falou no (nome do evento), mas eu não ia ao (nome do evento), eu ia mesmo à (nome da associação) que haviam reuniões todos os meses um dia no final do mês, mas pronto, as pessoas iam lá falar sobre os doentes e, mas era mais falar sobre a situação em que as pessoas estavam, não era sobre elas…

M- Sobre o aspeto pratico de…para o cuidador…

P6- Do doente…

P5- Supostamente devia ser, devia ser não só para o doente, devia ser sobre o cuidador, mas não, alguns aspetos eram relevantes, no sentido de, que eu achei que havia pessoas que eram mal diagnosticadas, mas depois também havia muita falta, é isso que eu acho, havia muita falta de apoio ao cuidador porque há pessoas que ainda tinham, um senhor por exemplo, pessoas que ainda eram casadas, pessoas com uma certa idade, e o senhor chorava imenso, coitado, não tinha apoio nenhum, é isso que eu acho incrível, é que não haja apoio, quer dizer, eu sou uma situação, mas aquelas pessoas mais velhas, que ainda estão casadas e não sei quê, acho que é intrigante não haver apoio e o senhor queixava-se imenso…

P4- Isso é que eu acho! Eu também me queixo imenso, e quer dizer, embora seja daquele género de pessoa que levo as coisas para a frente e como sempre fui assim muito senhora toda a vida, ter de decidir, ter de trabalhar e ter de fazer e ter que acontecer, mas também nunca me queixei disso, tive de olhar pela vida da família toda, nunca me queixei muito disso, mas há muitos dias que estou louca, eu já tive duas depressões, e eu neste momento estou a passar por um momento muito difícil, mas no entanto vocês nem deram por isso, não é? No entanto, eu não sei o que é que é isto vai dar, estou preocupada? Estou! Já é a terceira vez! Não é? Uma vez num sítio, outra vez noutro e outra vez noutro, não é? E são problemas de carcinomas, não é assim muito fácil! E eu tenho a minha mãe, ainda me preocupo com ela e ela só se preocupa com quanto tempo é que eu vou demorar, porque ela preocupasse é com ela!

P6- Mas coitadinha, peço desculpa, eu acho que eles são tipo…

P4- Eu sei!

P6- … Aquele bebé, muito crescido! Que precisa muito do nosso apoio!

P4- É! Se visse as minhas fotografias que eu tenho aqui! Até dizia…

P6- Peço desculpa, deixe-me só dizer aquilo que eu estou, aquilo que eu sinto é isto, é uma bebé grande, é um bebé envelhecido mas que não pode faltar um pilar, neste caso, já lhe falta o pilar do meu pai, está ali outro pilar ali, que sei que sou eu, a minha irmã é um pilar adjacente, que ela também sente isso mas eu sei que, pronto… “Aí se tu adoeces, aí Valha-me Deus…”. Ela sabe que, está a perceber? Eles precisam disto. Eu sinto que tenho de me esquecer de tudo o resto, de tudo o resto que existe, mas só tenho que, para aquele momento, tenho de estar pronto, o mais soft possível, não é?

CM- É a P6 que se preocupa em adoecer? Porque deixa de ser um pilar para a sua mãe, ou é a sua mãe que se preocupa que a P6 adoeça?

P6- Não, ou seja, a minha mãe diz: “Aí não podes, isso não!” Está a perceber? Eu tenho de estar sempre ali, é assim como eu criei a minha filha sozinha e tinha de estar sempre fresca e fofa, não podia estar doente porque ela ia perceber e tinha que omitir, fiquei cá internada quase oito dias e tinha que dizer à [nome da filha] que estava a trabalhar [risos]…

CM- Tem de estar bem para ela…

P6- Mas pronto, ficou a minha mãe com ela, pronto, tinha esse, a mãe, a minha mãe estava lá e eu agora também tenho que compreender que ela também tem aquela fragilidade e não….

P4- Mas eu compreendo, só que também existo!

P6- Ó minha querida, eu sei e eu percebo! Eu percebo…

P4- Repare, eu compreendo, e também se calhar o tempo que eu invisto com a minha mãe é muito superior ao tempo que invisto para mim, em permanência, a toda a hora. Eu tenho um seguro de saúde para ir o médico a casa, que vai lá vezes sem conta! Porque se não for lá o médico ela não se acalma, percebe? É uma pessoa que pronto, exige muita atenção, muita atenção… Mas tenho, por exemplo, eu considero-a, estava-lhe a mostrar isso, eu tenho dois netos, um com dois e outro com quatro! A minha mãe e eles os dois são tudo a mesma coisa!... [risos]

P6- [risos]

P4- A minha neta tem quatro anos, zanga-se com a bisa que não lhe deixa ver os “desenanimados”! [risos] O (nome do neto) é o menino e a (nome da neta) é uma malcriada, diz a minha mãe! [risos] No entanto, os meninos gostam de estar com ela, percebe? E ela gosta dos miúdos! Pronto, mas eu também existo! Eu preciso de ter férias! Eu preciso de limpar a minha cabeça! Eu preciso de não ter de me deitar às 4 ou 5 da manhã para espairecer! Para limpar! Que eu tenho necessidade de ler determinadas coisas, porque sou também interessada em determinado tipo de assuntos! Pronto, a nível de medicina também! E de outras coisas que eu gosto muito, gosto muito de coisa de ciência e essa coisa toda, gosto imenso!

M- Eu ia perguntar isso, já mesmo para terminar que já vos tiramos muito tempo, que é, como é que vocês cuidam de vocês, ou seja, quais são os bocadinhos que arranjam para vocês…

P4- Olha eu já disse quais são os meus!

M- A P4 já referiu, portanto, as leituras, pequenas coisas à noite, rouba tempo à noite para andar aí a surfar um pouco pela internet…

P4- Eu tenho a mania das nanopartículas e dos catiões e dessa porcaria toda, tudo o que seja relacionado com isso, eu estou lá! Percebe?

M- Ok, ok…. Muito bem!

P4- E então isso demora, eu tenho que estar sem a minha mãe ao lado, sem a televisão em altos berros, por isso estou até as quatro ou cinco da manhã! Esse tempo é o meu! Percebe?

M- Ok, ok…. Muito bem! É o seu tempo! É o seu tempo! E é a forma de tomar conta de si, acho muito bem! E a P5?

P4- É, outras vezes não me apetece fazer isso, é sudoku’s aos montes, aos montes, aos montes!!

P5- É assim, é complicado, as pessoas, às vezes, deixam de ter tempo para elas, mas é importante…. É assim, mas não deixei de tipo sair com amigas, tipo ir caminhar…

P4- Não eu não faço isso! Nada!

P5- Mas isso foi um propósito, que é nunca, que acho que é super importante, que é caminhar todas as semanas com amigas, houve coisas que, eu fazia voluntariado e isso e deixei de fazer…. Ler, deixei de ler…

M- Ok, e já agora em relação às amizades, como é que isso, manteve igual?

P5- Sim, sim, sim! As minhas amigas, até por acaso, faziam-me imensas perguntas sobre esta questão da minha mãe, porque não sabiam se os pais podiam vir a ter e algumas amigas tinham amigas que os pais, estavam-me sempre a perguntar como a minha mãe foi das primeiras diagnosticadas no meu grupo de amigos e perguntavam, faziam imensas perguntas… Mas…

M- Ok…

CM- Por acaso, está-me a fazer lembrar o senhor P1 ontem, que dizia que já se sentia capaz de dar uma formação, porque aprendeu tudo sozinho e que aqui há um pouco também isso… A P5 também ajuda outras pessoas…aprendeu tudo sozinha…

P5- Pois! Sim, é isso, é que eu não tive ajuda, eu não tenho tido, é isso que eu acho que reclamo que devia haver, aprendi que não há, e mesmo que a pessoa procure e procure… Eu senti-me agora completamente despida, no sentido de a pessoa procura alguma coisa nesta fase e consegue, não há!! A pessoa sente-se….

P4- Abandonada! É isso!

P5- Sim, sem nada! Quer dizer, não há…

M- Olhem, deixem-me só fazer uma pergunta, esta experiência da mãe ir para o lar é muito recente, não é?

P5- Sim!

M- O que é que mudou? Mudou para si em termos de estrutura do dia, que há pouco falávamos, em termos de…

P5- Sim, é assim, eu agora sinto-me mais calma, porque eu andava sempre super nervosa e ansiosa porque provocou e senti que tenho mais tempo para muitas coisas que não tinha. Isso eu senti que agora, que nem sequer me estava a aperceber dessa situação…

M- Ok…

P5- Eu agora sinto-me neste espaço de tempo, de tipo, um mês, senti que tenho muito mais tempo para mim e para os meus filhos e para fazer montes de coisas que eu, é assim, tinha deixado de fazer, e só me apercebi agora nestes, neste mês que a deixei ali, percebe?

M- Ok…

P5- Aquilo, ela consumia imenso de tudo de mim, não é? Eu estava sem culpa, mas pronto, eles conso… é, porque o pilar dela sou eu, era eu, de tudo, tudo era comigo, eu era sempre tudo e mais alguma coisa, pronto…

CM- Mas a P5 tem irmãos?

P5- Eu tenho irmãos, só que os meus irmãos não, primeiro não queriam que a minha mãe viesse para aqui para (localização), pronto, mas foi essa situação de a minha mãe partir o ombro. É assim, eles estavam lá, nem sequer se dignaram a ir levar a minha mãe ao hospital…. Pronto, e eu tive, não podia deixá-la sozinha, não é? Tive que a trazer e depois não queriam que a minha mãe ficasse cá, mas eu agora penso, se a minha mãe tivesse ficado lá, quer dizer, o que é que tinha acontecido? Eu não ia constantemente a correr para lá, não é? Pronto e acho que isso também uma coisa que eu já ouvi falar é que há familiares que não aceitam que a mãe ou o pai tenham este tipo de doenças, não é? Não é?

P6- É! A minha irmã não quer aceitar!

P5- Que ainda é uma vergonha e que isto, é assim, mas isso, não sei se foi por causa do meu filho, é assim, mas isso acho inconcebível, é outra coisa que eu acho, porque esconder? Qual é o problema? Não é?

M- Hum hum…

CM- Sente que ainda há algum estigma em relação?

P5- Há muito estigma! É assim, em relação a estas coisas todas, acho que há, é horrível, não é? É preciso mudar mentalidades neste aspeto!

P6- Sim!

P4- Mas eu, uma coisa que eu queria dizer, em relação à minha mãe, que eu tenho consciência de que neste tempo eu tenho dado tudo e mais alguma coisa de mim! Mas começo a sentir-me….

M- Muito cansada…

P6- Frágil…

P4- Exausta! Completamente exausta! Depois como vou tendo outros problemas de saúde, também graves, o dela é grave, não é? Mas os meus, ela passa na boa no meio daquilo tudo, sabe? Porque ela tem um coração ótimo, tem os pulmões ótimos, tem tudo ótimo, tem tudo bem! Não tem colesterol, não tem triglicéridos, não tem nada! Eu tenho tudo e mais alguma coisa que possa imaginar!

M- Pois!

P4- E depois, também há a solidão, porque isto implica a pessoa abdicar de sair com amigas, no meu caso, porque ela vive sozinha comigo! Claro que é uma lapa agarrada a mim! E eu mesmo que consiga ir fazer um fim de semana fora, telefono três vezes ao dia para a pessoa que lá fica com ela…

M- Hum hum

P5- Mas é assim, é isso que eu digo, porque havia, nesse sentido, devia haver apoio no sentido de a pessoa, do cuidador poder descansar! Não é? Estarem lá umas horas, para ir esvaziar! Mas aqui não há!

P4- Pois, é isso! Eu tenho falta disso, e eu digo: “Eu não posso estar sempre!”. Percebe?… E agora como estou a passa por uma situação destas, preciso de alguém que fique com ela…

CM- Existe, mas é caro e é longe, muitas vezes são estas as respostas…

P5- As respostas é ou a pessoa põe numa residência, como eu pus este ano para ir de férias, pus numa residência, ou então contacta aquelas empresas como eu contratei que são caras, não é? Uma semana paguei 900€!

M- Ok…

P6- Para a minha mãe está fora de questão ela ter alguém lá em casa, mesmo fora de questão, ela não quer mesmo!

M- Já agora para ouvir no seu caso…

P6- Diga…

M- Como é que toma conta de si?

P6- É assim, eu estive neste, até há pouco tempo, aquela situação do meu pai, foi muito desgastante, mesmo muito, porque era a correr, o meu pai estava nos paliativos e foi muito esgotante porque era, a minha filha estava fora, e eu tinha que correr para aqui, correr para a minha mãe, e dei por mim duas vezes a estacionar na minha praceta e adormecer dentro do carro e eu disse: “Bem, se isto um dia me acontece na autoestrada, estamos mal!”. Foi muito desgastante e depois alertaram-me, eu tenho fibromialgia e tenho uma doença autoimune e tenho uma coluna muito má, “Ou cuidas de ti e disciplinas-te” e eu disciplinei-me em ir quase todos os dias ao ginásio.

M- Ginásio… ok

P6- Tenho que, tem de ser, tem mesmo de ser, porque um dia posso deixar de andar e então é assim, “Tens que pensar em ti, tens que, por muito que queiras, tens que neste momento…”

M- Tem a sua horita de ginásio…

P6- Sim tenho…

M- Ok e amigos?

P6- Vou tendo alguns, também tenho uma situação um bocado, muito complicada, com a minha adolescente, que me roubou muita coisa da minha vida… E então tenho que ir gerindo…

M- Ok…

P6- A minha mãe, só uma coisa, teve possibilidade de ter uma psicóloga, que os paliativos têm a possibilidade de dar uma ajuda de luto e a minha mãe não quis, ela própria diz: “Eu não vou contar a minha vida a um estranho!”. Pronto e então…

M- Ok, ok…. Muito bem! Não vos maço mais, a menos que queiram dizer mais alguma coisa que sintam que nós…

P6- Quero só dizer uma coisa, no sentido do que agora estava a dizer, quando foi diagnosticado, e eu na altura conhecia uma enfermeira que é daquela associação da (localização), os nossos filhos andaram na escola juntos e pronto, senti logo que não havia grandes ajudas e não há o divulgar!...

P5- É isso!

P6- Não há o divulgar, não há o falar sobre estas situações, como é que é melhor fazer, como se deve fazer, como devemos de agir com esta agressividade, com esta cobrança…É normal, faço muitas vezes estas perguntas ao Professor, é normal ela exacerbar os sintomas, a agressividade para com a pessoa que está mais perto, vou fazendo estas… Era bom que isto fosse posto a publico para as pessoas, e se calhar muitas pessoas têm, neste caso, um doente destes em casa e não sabem o que têm…

P5- Pois é isso que eu, lá falavam muito, na associação eram pessoas que tinham familiares que tinham muita agressividade, mas aí acho que tem que se falar com o médico para controlar ali um bocadinho com medicação…Era o que eu falava com a Professora era, e quando notava que estava mais agressiva a minha mãe, eu falava com a Professora e medicava e ela tornava-se mais calminha… Como também acho que Portugal, penso que Portugal é assim, a nível destas situações e ainda hoje falamos nisso ao almoço entre colegas, a situação do lar que foi divulgada, agora eu penso, quer dizer, a maior parte deles deve ser tudo escondido e tudo assim para ganhar dinheiro, não é? E eu sei que é, porque conheço pessoas que trabalham em lares e sei que é assim…

P4- Por isso é que eu não consigo por a minha mãe num lar…

P6- Agora é assim, como é que vai ser? É um tiro no escuro? É! Portugal está no terceiro mundo, está, a nível disso está, estes doentes precisam de um cuidado muito especial!

P4- Mas eu acho que os lares também funcionam mal porque há falta de fiscalização honesta…

P6- Controlo…

P4- Acho que há, e há falta de medidas para quem transgride, porque eles fecham aqui, abrem acolá e fazem essa coisa toda e eu pergunto-me se um dia eu, a minha mãe se for ver porque ela tem saúde, não tem é saúde mental, não é? E como eu não tenho é a outra, que me falta infelizmente, se um dia ela tem que ir para um lar eu entro em pânico completamente! É porque é assim, eu não estou a imaginar, como houve um há pouco tempo, e aí, eu realmente sou terrível, sou muito impulsiva e eu querer ir visitar a minha mãe e não poder ir ao quarto dela! Não poder ir aqui! Não poder ver isto, não poder ver aquilo! Comigo olhe, digo-lhe já, era logo ali um serrabulho de todo o tamanho!

P5- Mas por isso é que tem de visitar antes, tem que visitar antes para ter uma…

P4- Sim, mas visitaram antes! As pessoas visitaram antes e mostravam a toda a gente o mesmo quarto, certo? E nas visitas, as pessoas não podiam ir aos quartos! Era só na sala!

M- É a sua experiência? Está a ter esta experiência?

P4- Bem, mas há aqui, eu digo-lhe uma coisa, o lar… olhe, mas digo-lhe uma coisa…

P5- Não! Eu vou lá, é assim, apareço lá às horas que eu quero e me apetece, é assim, mas agora por acaso, vou mudar a minha mãe, vou mudá-la, porque acho, para outro mesmo, por questões de que, não sei quanto tempo é que ela vai durar e não sei quê e vou levá-la para (localização) e já tive a ver, já contactei e agora vou, quinta-feira vou visitar vários. Pronto, mas desde que ela está ali eu apareço e não digo quando é que lá vou, apareço de surpresa e acabou-se!

P4- Epá, este lar era um lar em (localização), que eles filmaram aquilo com um drone e estas coisas todas, com um aspeto fantástico, super arranjado, com piscina com isto, com aquilo. Lá dentro, punham colchões debaixo das camas e as pessoas dormiam no chão!

M- Hum hum …

P6- Na televisão, não é?

P4- Epá, eu digo-lhe uma coisa, se eu visse uma coisa dessas, aí meu Deus! Saiam da frente porque eu sou muito pequenina, mas…

P6- Pois, isso é muito mau!...

M- Não há de ser tudo assim… Não há de ser tudo assim…

P4- Mas… Não é tudo assim, mas olhe que a maior parte eu acho que a maior parte eu acho que é assim… Eu já não acredito neles!

P5- Pois é isso é que as pessoas depois acham que é assim, mas é, é certo, chega um ponto, é assim, com outras pessoas lá em casa, eu podia, é assim, esta situação da empresa que contratei tem uma situação que se chama: o lar em casa. Também tem essa situação, levam 2300€…

M- Por mês?

P5- Por mês, eu até podia pagar, mas tinha que lá ter uma pessoa, mas depois não é sempre a mesma pessoa, claro que as pessoas não aguentam, não é?

M- Claro! Fazem rotativa!

P5- Pois! Ainda mais com esta doença, é tipo 3 dias estava uma pessoa, ou durante uma semana e depois outra semana, quer dizer, ia tendo não sei quantas pessoas lá por casa?

P4- Pois é isso! É isso!

P6- Nós devíamos, peço desculpa, sermos ensinados a como, por exemplo, eu noto por exemplo, que as vezes há qualquer coisa que eu digo ou que eu não digo, a minha mãe fica nervosa e se seu não digo, é “Porque tu não dizes e não queres saber de mim”, está a ver? Estas pessoas são assim, nos temos de ser ensinados a lidar para não causar ao doente este transtorno, acho que era muito bom que isso acontecesse…

P4- Pois, eu não aguento pensar ter a ideia de que fazem alguma coisa à minha mãe. Porque eu trato-a como se fosse uma boneca. Portanto, embora seja muito aberta nas conversas com ela, ela tem assistência para tudo. E eu só de pensar nisso passo-me e vou-lhe dizer porque é que me passo, é porque quando eu tinha quatro anos a minha mãe divorciou-se e eu voltei a viver com ela quando eu tinha doze, e ela nunca quis saber assim muito de mim, mas sempre tive uma paixão por ela, porque ela era tão linda, tão linda, tão linda…A minha mãe era tão linda de morrer! Percebe? E eu sempre tive aquela coisa, que acho que foi tudo, hoje em dia, chego à conclusão que, não sei talvez fosse uma maneira, aquilo era uma paixão era, como se ela… Se ela tivesse sempre presente, se calhar não tinha sido assim, não sei! Mas como não esteve presente e também não se preocupava muito com isso, foi sempre uma mãe muito despreocupada, percebe? Eu sempre fui o contrário com o meu filho! E com os meus netos!

M- Muito bem!

P5- Pronto, é isso, o apoio psicológico é muito fundamental, nem que fosse terapia de grupo, não é? É super importante!

P6 e P4- É…é …

M- É…

P5- Porque depois vêm outras….

P4- Porque há coisas, às vezes, que estão por trás, que as pessoas não se apercebem! E eu há uma coisa que me afetou, que me incomodou, doi imenso…

P6- O que será melhor, o espírito de partilha…

P5- É que não é só a pessoa com um psicólogo, não é? Estar ali a pessoa com uma terapia de grupo, acho que é essencial, não sei se é muito difícil de…

M- Não mas estão aqui comentários que, e estas opiniões são muito importantes porque, a questão é que me parece que nem sequer há muitos, portanto, haverá a associação (nome), pelo que me disseram, é insuficiente…

P4- Veja só se não era um espanto (mostra uma foto da mãe) Esta é a minha mãe…

M- É sim senhora!

CM- Eu já a conheço!

P4- Conhece-a…

CM- Conheço, ela veio à consulta…

P4- Mas não viu esta…

CM- Mostrou-me sim!

P4- Aí mostrei?

M- Há a associação (nome da associação), há poucas, há pouco recurso e se calhar vale a pena investir nisso.

P5- É isso, eu acho que vale a pena mesmo investir, eu é assim, o café memória, eu ainda não, como tive esta situação, mas depois queria participar para ver como é que funciona…

M- Hum, ok …

P5- Mas não há, eu acho que não há e é muito necessário!

M- Bom, muito obrigado, já vos roubamos muito tempo, foi muito útil, e quando nós tivermos completado aqui os quatro *Focus Groups* e depois um trabalho complicado que é analisar isto, a CM depois envia-vos os resultados, está bem?

Claúdia- Sim, mas não sei se têm a possibilidade, não sei se estou aqui, qual é que é a vossa formação?

CM- Eu estou a tirar doutoramento… O Professor é psicólogo…

M- Sou psicólogo, é…

[risos de todos]

M- E a (nome da anotadora) também…

P5- Pronto! Mas nesse sentido de, [risos de todos] fazer alguma coisa, sim, por esta, por pessoas como nós…. Fazer um grupo ou alguma coisa, que acho que é essencial…

M- Não não, isto para mim é muito óbvio!

CM- Eu oiço muito, estando ali, estando ali a falar com cuidadores no âmbito da primeira fase e desta fase do trabalho oiço muito isso, e no fundo eu acho que é a fase três ou quatro deste projeto!

M- Os projetos de investigação têm esta coisa boa que é levantarem ideias para depois intervir, não é? Portanto esperemos que daqui saia também alguma coisa nesse sentido…

P5- Eu acho que é bom que consigam, porque acho que isso é muito importante…

P6- É, eu as vezes pergunto ao Professor I, “O que é que eu faço?” … Uma coisa que eu dizia à pediatra da minha filha, “O que é que é melhor neste caso?”, “O que é que se faz?”, e é isto um bocadinho… Por exemplo eu falo com o Professor I, “Olhe a mãe precisa, disseram-me para dar esta terapêutica”, e ele diz “Aí, não acho muito bem porque isso interfere na” …para a dor, porque eles têm que dar logo assim aquelas morfinas e aquelas memantinas… E então ele não me aconselhava, e eu falo com o Professor nesse aspeto, agora há muitas outras coisas…

M- Não, há todas as outras dimensões que ficam muito claras aqui, não é? É como eu disse, esperemos que depois de termos os resultados analisados, a coisa fique mais clara porque a verdade é que para criarmos estruturas precisamos de demonstrar que há utilidade nas estruturas, não é?

P5- Pois é isso!!

M- E que há bondade das pessoas, não é? E que também há, porque não basta criar grupos de apoio, depois é preciso criar sustentabilidade nos grupos e isso implica mais uma vez, questões de financiamento, questões de … E das duas uma, ou há estruturas que financiam ou são as pessoas que cofinanciam, mas que implica mais custos para as pessoas que não faz muito sentido, portanto é preciso criar aqui estruturas, mas é muito bom termos várias pessoas a dizer a mesma coisa! No outro *Focus Group* também saiu um pouco a mesma ideia…

P5- Pois, porque há pessoas que, por exemplo, eu estava a pensar ir a um médico se calhar mandava-me tomar não sei quantas coisas para a ansiedade, não é? E se calhar é muito melhor estar a falar…

M- Provavelmente…

P5- E expor os meus problemas do que estar a tomar não sei quantos medicamentos, não é?

M- Provavelmente…

P5- nome de medicamento ou não sei quê… [risos] que faz super mal!...

P4- Eu por acaso tive aqui um médico que me acompanhou numa das fases complicadas da minha vida após uma operação e que já morreu e que eu gostava imenso, e ele dizia que nós temos que, em relação por exemplo às coisas do passado que nós vamos guardando e não sei quê, isto nós devemos meter as coisas em gavetas e fechar as gavetas.

M- Hum… algumas…

P4- Não devemos estar sempre a abrir…

M- Mas é bom que estejam bem fechadas…

P4- Era o Professor K…. Não era o K nada….

P6- Que estejam?

M- Bem fechadas…

P4- Não, era trabalhava com o Doutor M… A minha cabeça…

M- O problema de fechar as gavetas é que, às vezes, fica lá o material desarrumado… A P4 não gosta de materiais desarrumados, não dá, não dá!... [risos]

P4- Se calhar por isso é que eu ando sempre a remexer nas gavetas!

M- É, tem de ser…Bem muito obrigado!!

P6- Mas vocês não acham que há cada vez mais, aquilo que eu sinto, há mais diagnosticadas demências, montes de pessoas dizem que os familiares têm demência…

CM- É um problema crescente…

P6- É, não é? É, não é? Também acho que sim, porque a minha irmã tem essa hipótese, que é jovem, não é tão jovem assim e pronto já fez os testes lá em cima na neurologia e ainda é nova, não é? E noto que muitas pessoas que se fala, “Aí tem demência…”, “Está a fazer terapêutica” … Noto muito que está, é uma explosão neste momento… Mas para isso, é preciso dizer à Professora D? Para fazer esse?

CM- Os testes que a sua irmã fez…? Não sei, como é que fez?

P6- Porque a minha irmã anda cá na neur… na psiquiatria, que é o Professor A, que achou por bem ela fazer…

CM- É o Professor A…

P5- Ah…

P6- Porque ela tem algumas alterações comportamentais um bocadinho…

P5- Sei lá, não sei, como a Professora D disse que há forma de saber…

M- A vantagem é, mais ou menos, o que é faz com a informação? Não é?

P5- Foi isso que a Professora D me disse, que ia limitar a minha vida toda, não é?

P6- Eu é que puxei por ele…

P4- Eu fiz, eu já, eu tentei participar nisso, que, entretanto, cancelaram os estudos… Era no do, acho que era (nome da instituição), e tinha o apoio da Professora J…

M- Sim! Muito obrigado!

***Focus Group* C**

M- Moderator

CM- Co-moderator

P7- Caregiver, female (daughter)

P8- Caregiver, female (daughter-in-low)

P9- Caregiver, female (sister)

P10- Caregiver, female (daughter)

P11- Caregiver, female (wife)

P12- Caregiver, female (husband)

M-  Muito bom dia a todos, mais uma vez obrigado por estarem aqui connosco, eu pus a gravar, como viram aí na, no consentimento informado, nós precisamos de gravar em áudio para depois fazermos, no fundo, passarmos isto para o papel e depois a CM há de fazer uma análise dos conteúdos, não é só deste *Focus Group*, nós já vamos, este é o terceiro, ainda vamos ter mais um pelo menos. E portanto, aquilo que a CM vai analisar é o conjunto, portanto, tudo anonimizado, os vossos nomes não aparecem e depois vocês hão-de receber as principais conclusões, para depois, se quiserem comentar ainda por cima dessas conclusões, poderem comentar e poderem nessa altura contribuir ou se virem algum erro evidente, corrigir também o erro, também pode acontecer. Eu não sei se algum de vocês esteve num *Focus Group* alguma vez, não?

Todos os participantes- Não não…

Todos os participantes- Eu, é a primeira vez…

Todos os participantes - Eu também…

M-  É muito simples, a ideia é conversarmos de uma forma espontânea, livre, eu tenho um trabalho mais fácil juntamente aqui com a CM, a (nome da anotadora) também está ali a tirar notas, vai tirando notas de coisas que, enfim, lhe ocorrem à medida que vai ouvindo e eu e a CM vamos moderar, o que significa que basicamente vamos só levantando algumas duvidas, algumas perguntas, mas a ideia é vocês conversarem sobre alguns temas, e eu tenho aqui na minha mão os temas, e vou tentando gerir aqui os temas à medida que vocês vão conversando, está bem? É óbvio que o que nos traz cá é o cuidado, o vosso cuidado com o familiar ou com um próximo que tem algum tipo de demência, nomeadamente Alzheimer, e é por isso que foram convidados, vocês já fizeram também um questionário, não é? Preencheram um questionário sobre a vossa experiência e agora é completar o questionário com mais ideias e coisas que os questionários não apanham e só conversando é que conseguimos perceber… Nós estamos muito interessados em perceber o que é que, os encargos e a dificuldade que é cuidar e de que forma é que nós podemos pensar em soluções para melhorar a capacidade do cuidado das pessoas que estão ao vosso cargo, digamos assim, mas por outro lado também o cuidado convosco, não é? Também pensar um pouco a esse nível. Se calhar fazia uma pequena ronda, eu sou o (nome), desculpem, esqueci-me de dizer o meu nome, sou psicólogo clínico e da saúde, e pronto, eu se calhar pedia para se apresentarem, eu sou péssimo com nomes, mas pode ser que vá decorando alguns nomes e …  diga, diga…

P7- Posso só interromper, não tem a ver com isto, tem só a ver, qual é o tempo que esperam que demore?

M- Eu penso que, o que está planeado era uma hora, uma hora e um quarto, possivelmente…. Se alguém tiver que sair antes não há problema nenhum… O seu nome?

P8- (nome do participante)

M- P8, ok… E pode dizer-me quem é a pessoa que está com demência?

P8- Neste momento, é o meu sogro, só que tive a minha sogra também mas faleceu agora em maio…

P9- Eu peço desculpa, eu agradecia só que falassem um bocadinho mais alto…

M- Mais alto…

P8-Sim!...

P9- Já me falha um bocadinho o ouvido…. Desculpem… Que é para poder acompanhar alguma coisa…

P8- Mas tinha os meus sogros, eles estão connosco há oito anos, vai fazer agora oito anos e ela acamou há cerca de um ano e pouco e agora em maio faleceu e pronto, ficámos com ele, e ele tem 93 anos, ela faleceu com 91…

M- Também tinha demência?

P8-Também tinha, já… A dela estava mais avançada do que a dele, eu noto porque ia vendo pelas reações dela que ele está agora a fazer…

M- A fazer o mesmo trajeto…

P8- A fazer o mesmo…. Exato. E sempre notei que a dele estava ligeiramente mais atrasada, mas pronto, está como está…

M- Quem é que está a cuidar, é?...

P8- Dele, neste momento, pronto, estamos eu e o meu marido, não é?

M- Estão os dois…

P8- Eu trato da parte de limpezas, alimentação, e ele mais a higiene pessoal, pronto… Ele é que trata, dela era eu que tratava…mesmo quando acamou, tinha uma pessoa que me ajudava, mas era eu que fazia tudo, agora com ele a parte higiene íntima, é mais com o meu marido…

M- É mais para com o marido…Ok, e são os dois que estão lá em casa?

P8- Somos só os dois…

M- No seu caso? E o seu nome?

P10- Chamo-me (nome do participante), e é a minha mãe que está doente, portanto ela está com Alzheimer, aliás, a minha mãe sempre teve, foi esquizofrénica, foi e é, mas com o Alzheimer a esquizofrenia, por incrível que pareça desapareceu, é engraçado que, o Alzheimer apoderou-se… E pronto, e sou eu que estou a tomar conta da minha mãe…

M- Ok, muito bem, sozinha?

P10- E faço tudo sozinha…

M- Sozinha, ok… e filhos lá em casa?

P10- Não, agora por acaso tenho o meu filho, mas já é um homem, não é? Mas quer dizer, ajuda no que pode, tem a vida dele, não é?

M- Ok, no seu caso?

P9- (nome do participante), é a minha irmã que está doente com Alzheimer, tem uma característica na questão de raciocínio, está ótimo, está praticamente igual aquilo que foi a vida inteira. É o esquecimento, no momento, de maneira que depois dá origem a confusão, não é? Ainda ontem por exemplo, via ali outra pessoa, “Mas quem é a aquela rapariga que estava ali?” “Onde é que foi?”. Ela começou aliás com as alucinações psicóticas, que foi como ela começou aí há uns três anos e depois tem avançado pouco, tem mantido ali mais ou menos as mesmas características…

M- Que idade é que tem?

P9- De temperamento, é fácil de conduzir, o que é que depois com estas coisas que vão aparecendo, sei lá, são tantas, eu claro que tenho idade, sou mais nova e tenho menos sete anos que ela, eu estou com 83 anos, ainda tenho um part-time de contabilidade, porque não quero…

M- Parar…

P9- Parar, e não me ocupa muito tempo, portanto contínuo, e, portanto, estou sozinha com ela, somos só as duas, já não temos mais ninguém e o principal problema é a confusão dela…

M- A confusão dela…

P9- A confusão, para mim é o principal problema. Alimentação, ela aqui vem durante o dia, venho-a buscar às, perto das cinco, mas enquanto está aqui está muito bem, porque ela tem que estar ocupada. O problema dela é estar sem fazer nada, tem de estar ocupada, de maneira que ela aqui está bem, estou bastante satisfeita dela estar aqui assim, porque melhorou até bastante…

M- Muito bem. O seu caso?

P11- (nome completo do participante), o meu marido está com demência…

M- P11…O seu marido?...

P11- Sim, com demência…

M- Que idade é que ele tem?

P11- Vai fazer 81 para o mês que vem…

M- Ok, e a P11 tem?

P11- Em dezembro… Eu? 76…E sou eu que faço tudo, levanto-o, dou-lhe banho, vestir- dou-lhe comida, faço tudo tudo tudo que ele já não faz nada! Agora aqui, começou a tomar banho aqui agora há um mês e tal para cá, o resto sou eu.

M- Muito bem, no seu caso?

P12- (nome do participante), é a minha mulher, (nome do doente), tem 70 anos, quando estava bem era ela que tratava de tudo, temos dois filhos, tratou sempre de tudo, que eu entrava muito cedo no serviço e chegava bastante tarde. À coisa de quatro anos, mais, era uma depressão, era uma depressão, mas não era depressão nenhuma, já era isto, teve de sair do emprego mais cedo, entrou no desemprego…

M- Que idade é que ela tem?

P12- 70 e agora pronto, sou eu que tenho de fazer tudo, porque ela não…

M- Portanto as coisas começaram à cerca de… há quanto tempo é que isto começou?

P12- A piorar, a piorar há coisa de 4 anos…

M- 4 anos…

P12-  4 anos… Começou por, no dia a dia, a não conhecer as coisas, não conhece o dinheiro, não… Tinha um pavor dos telefones, não atende telefone nenhum… Pronto, tenho que andar com ela sempre, que eu mandava-a ir lá a baixo, tem um supermercado no rés do chão, dava-lhe dinheiro, porque ela como não conhece o dinheiro, dava-lhe sempre dinheiro para dar-lhe o troco, pedia-lhe quatro, cinco coisas e chegava-me lá com uma, duas… “Ah então mas…”, começou assim, pronto, e agora tenho de ser eu a tratar de tudo, tenho de andar com ela para todo o lado porque ela, não …

M- Também vem aqui? Também vem aqui ao centro…

P12- Está aqui, entrego-a aqui todos os dias às 9 e depois venho buscá-la, à segunda e à terça as quatro e meia que é para ir buscar os netos, para ver se ela se ocupa e brinca um bocadinho com eles, à segunda, como dizem que faz muito bem, estou a fazer o esforço que ainda consigo levá-la à piscina, para fazer hidroginástica e para ter contacto com os amigos já de há muitos anos e então, mas ontem, disse que lhe doía a cabeça, estava mal disposta, cansada e as colegas em volta dela: “(nome do doente) anda, anda…”, não foi. Mas eu insisto sempre porque pelo menos toma banho e fica logo dali já despachada…

M- Ok, ok, muito bem!...E o seu caso?

P7- O meu nome é (nome do participante), é a minha mãe, que tem 87 anos, fez agora, é uma demência ainda ligeira, é controlável ainda mais ou menos, mas pronto, deixou de poder também estar sozinha, porque não é capaz de aquelas decisões normais, banais do dia a dia, é incapaz… E pronto, eu tenho a minha casa, e vivia com uma pessoa, e vivo, e tenho um cão, o meu filho já saiu de casa, mas saí da minha casa, estou quase há 8 meses em casa da minha mãe, não estava a contar com isto, e pronto, mas é assim que tem sido… Já pedi apoios à (nome da instituição) e tudo, estou à espera. E ela neste momento não está cá porque, eu inscrevi-me também no descanso do cuidador, e ela entrou no dia 15, dia 16 de outubro, mas por acaso hoje até a trouxe porque aquilo está-lhe a fazer mal porque de facto, eu acho que este sítio é fantástico, porque é ótimo para ela e eu notei em 15 dias e estou preocupada em tirá-la rapidamente dali…

M- Dali, de onde?

P7- Onde ela está agora, no descanso do cuidador, que é uma Unidade de Cuidados Continuados, que vim a saber que é uma coisa onde estão pessoas que não, não têm, não há muito a fazer, portanto, são pessoas num estado assim pior, que é ali na (localização), que é um sítio da (nome da instituição), que foi uma das Unidades que eu escolhi e foi para ali que ela entrou, mas aquilo não lhe está a fazer nada bem…Pronto… A entrada foi muito violenta, depois adaptou-se, adaptou-se, não se adaptou, coitada…resignou-se…

P11- É como a mim, também me quiseram dar números, desculpe interromper, também me quiseram arranjar uma para o meu marido ir para o descanso do cuidador para o norte, para o norte. E eu disse: “Não, desculpem, eu não vou estar sem o meu marido um mês, sem ver o meu marido, para ele ir para o norte!” E eu recusei.

P7- Mas eu escolhi, aquilo pode-se escolher três unidades e a primeira que eu escolhi foi aqui na (localização) porque era perto também aqui da nossa zona e tudo, e pronto, já foi em março também que eu pedi isto, em maio, março março… e chamaram agora portanto acabou por ser nesta zona, mas não estou contente, quer dizer, pronto… saiu daqui deste ambiente e não lhe está a fazer bem, estou desejosa, desejosa de a tirar…

M- O horário lá é igual aqui?

P7- Está lá a dormir...

M- Ah, dorme lá…

CM- É 24 horas…

P7- Que é isto que é o descanso do cuidador, é um mês para poder descansar precisamente…, mas…

M- Um mês? Um mês por ano? É essa a ideia?

P7- Um mês, eu julgo que, em teoria, por lei, o cuidador tem direito a 90 dias por ano. Só que para um mês eu tive mais de seis meses à espera [risos]… 90 dias não há ano que chegue para isso!

P11- Eu tenho uma senhora também pôs o marido e foi lá buscá-lo…

P7 –Pois, eu tenho estado a aguentar 15 dias…

P11- Era horrível, tratavam o senhor de uma maneira… selvagem!

P7- Não! Ela não é maltratada, pronto, não tem é o acompanhamento que tem aqui…

P11- Não, não tem!...

P10- Eu sei… A minha mãe também teve num lar e eu tirei-a…

M- A sua mãe também teve num lar?

P10- Teve e tirei-a… O problema, é pronto, não há atividades, não há nada, percebe? Isso é tudo muito limpinho, tudo muito cheiroso, mas não passa disso… Portanto, não…

P7- É…Isso é que é…pois!

P10-Não…Nem à rua vinham, quando eu comecei a aperceber-me, nem à rua vinham, aquilo era um depósito, pronto, era um depósito…. Meteu-me impressão e tirei…

P7- É o problema dos lares eu acho, é o grande problema, porque uma pessoa não basta alimentá-la e dar-lhe um teto! Não basta mesmo! E esse é o problema!

P10- Mas por acaso é pena, que não haja mais centros de dia como este, porque este, dá-me ideia que deve ser o único que é centro de dia de porta fechada! Porque a maior parte é tudo porta aberta e o nosso caso, tem de ser de porta fechada… E não há, que eu fui a vários e não havia. Porque têm de ser autónomos, portanto entram e saem isso tudo bem, e não é o nosso caso…

P9- Como no meu caso, a minha irmã saiu um dia…

P10- Pois! Não é o nosso caso!...

P9- De maneira que passou cá para cima, precisamente porque não há perigo absolutamente nenhum…

M- Mas a alternativa é serem vocês a estarem com eles, não é? E isso também implica estas coisas todas, a estimulação, implica estarem a dedicar o tempo, o vosso tempo, ou muito do vosso tempo com eles, não é? Como é que vocês gerem a vossa vida neste contexto, em que, quando, estando lá em casa, a maior parte de vocês até estão sozinhos neste processo, como é que gerem isto? Isto é muito complicado, não é?

P11- Eu o fim de semana, que ele está em casa, quando ele, que eu o ponho a descansar, ele dorme sempre uma hora e meia, duas horas a seguir ao almoço, é que vou fazer as minhas coisas, ou vou às compras, ou vou ali, tenho a senhora a porteira que me vai deitando um olhinho enquanto eu coiso… E o resto eu faço, por exemplo, quando ele está aqui, faço por marcar as minhas consultas e as dele, por exemplo amanha tenho uma consulta, está marcada para as onze e um quarto, que é para eu poder neste espaço que ele está aqui eu fazer isso, ou fazer exames, ou fazer analises ou…É assim, e por isso eu prefiro, que já la foi o … da (nome da instituição) e eu prefiro que me ponham uma pessoa, que me ajudem a por uma pessoa lá em casa, porque está no ambiente dele e coiso, que me ajude, do que ele ir para um lar, não quero o meu marido num lar, só em ultimo caso…[emocionou-se].

M- Ok, no seu caso, já agora como é que consegue, eu não perguntei, mas há aqui algumas pessoas que continuam em atividade, não é? A P9, não é?

P9- Sim, sim!

M- A P9 continua a fazer a sua contabilidade, não é?

P9- Umas horas de manhã… que é quando ela aqui está…

M- E mais?

P8-Eu não. Tive de deixar… de me reformar…

P12- Eu estou reformado…

P11- Eu estou reformada, sou uma pessoa…bastante doente…

P7- Eu não estava reformada e não foi possível, porque ainda por cima eu, isto é tudo muito difícil, mas como eu deixei a minha casa, ainda é mais estranho, e para mim isto, agora fui-me adaptando mas quer dizer, tenho umas coisas aqui, outras coisas ali, vou a casa, venho de casa da minha mãe, moro em (localização), nem sequer moro aqui ao pé… Portanto, isto foi uma reviravolta na minha vida. Eu não a quero pôr em lado nenhum, ela tem uma irmã gémea, nós não temos assim mais família, que está num lar, teve que ser, vivia solteira, vivia sozinha e eu o lar é impecável, mas… E eu não gostava que a minha mãe seguisse isso, a (nome da instituição), em princípio, creio que no princípio deste mês, vai conseguir pôr alguém lá em casa, de modo a que eu possa sair e retomar a minha vida…

P11- Claro, é isso!

M- Mas como é que fez? Suspendeu a sua atividade profissional?

P7- Sim, suspendi a minha atividade, sim, sim… Eu estava por conta própria precisamente… Quem não sabe diz: “Ah, consegues compatibilizar…”, não consigo compatibilizar, peço desculpa, se calhar é problema meu, não sei, mas pronto, e preciso de me organizar outra vez…

M- E no seu caso?

P8- O meu caso, parece-me um bocadinho mais complicado porque eu e o meu marido, não tenho filhos, não temos filhos e nós tínhamos uma produtora de audiovisuais. Estamos casados há 34 anos e a nossa atividade era andar constantemente a correr o país de um lado para o outro, trabalhávamos sobretudo com o estado e com câmaras municipais e então estávamos sempre fora. Portanto, há cerca de oito anos, quando ficámos com eles, uma questão de, não queríamos, ainda por cima eram os dois, que não os queríamos colocar num lar… A minha cunhada, portanto, a filha deles, não podia tê-los e nós optámos por ficar com eles. Entretanto, eu pensava que conseguíamos de facto, controlar a situação, porque éramos os dois. Eu poderia ficar em casa, o meu marido ia para fora fazer os trabalhos e eu através, pronto, do computador e não sei quê, aquelas coisas hoje em dia…[risos], conseguia controlar a situação, mas foi impossível mesmo. E acabei por fechar a empresa… fechámos a empresa, estivemos os dois cerca de dois anos a receber do fundo de desemprego e depois curiosamente, nunca mais tivemos direito a nada porque éramos gerentes da empresa e o que a segurança social diz é que como gerentes não podíamos voltar a pedir qualquer apoio. Temos 61 anos…

M- Mesmo fechando a empresa?

P8- Mesmo…. Sim, encerrámos mesmo a empresa, mas como éramos gerentes, não podíamos ter o direito que têm os trabalhadores normais.

P10- Mas tiveram direito a fundo de desemprego?

P8- Tivemos…tivemos direito, antigamente não se podia, mas a partir de 2015, e foi em 2015 que eu encerrei a empresa…

P10- Engraçado que eu não…Ah, pois foi antes…eu quando fechei a empresa não tive direito a nada… [risos]

P8- Acabei por encerrar em 2015 e portanto, estivemos aqueles dois anos a receber sempre, e a partir daí temos 61 anos cada um e até aos 66 não temos direito a qualquer apoio da segurança social…

P10- Está bom…[risos]. Aí desculpe, tem de se fazer uma manifestação!

P11- Era mandar lá ir os ciganos, eles têm os direitos todos!

P10- Ah, pois! Eles é que sabem e pronto! Isto não é para quem pode, é para quem sabe…[risos]

P8-Portanto, neste momento temos vivendo com algumas poupanças e é isso…Não temos qualquer apoio de nada…

M- Ok, é uma situação difícil, não é? Diga diga, ia dizer…. Estava a dizer qualquer coisa e eu não apanhei…

P10- Eu também fui empresaria, durante 18 anos, mas eu foi, eu fechei a empresa em 2008, portanto…

P8-Pois, aí ainda não…

P10- …. Foi um ano em que, faliu muita empresa e fechou muita casa e os empresários não tiveram direito a nada! Nada! Muita gente nem sequer 1€ tinham por dia e ficaram sem nada e cheios de dívidas…. Portanto…

P8-Aí, eu só encerrei em 2015 porque já se falava que em 2015 já havia essa…E então eu a partir…

P10- Pois, mas isso, mas muitas pessoas passaram muito! Eu tentei a ver se conseguia a reforma, pronto, e não, porque era muito nova, não tinha direito, portanto, não tinha direito a fundo de desemprego, não tinha direito a reforma e ainda hoje não tenho reforma…. Portanto…

P8-Nada…nada! Pois é, eu também não…

M- Mas esta decisão de a P7 não é, deixou de trabalhar, no seu caso também tiveram de fechar a empresa… Portanto, o que eu interpreto é que fica mais caro contratar alguém para apoiar do que deixarem vocês de trabalhar, portanto, é essa a ideia? É?

P8-Sim sim…

P7- Ter alguém em casa é, eu pedi variadíssimas, eu tenho estado estes meses, não tenho parado e pedem-me, no mínimo 1000€, mais tudo…E já me pediram mais…

M- Uma empresa ou pessoa?

P7 –Uma pessoa…

M- Uma pessoa...

P7- Porque me disseram, empresas não contes com isso porque é muito mais caro, são estruturas, obviamente, tenho tido imensos contactos de pessoas, pessoas individuais e pedem-me no mínimo 1000€, depois mais alimentação, mais as despesas acrescidas na casa…

CM- Estamos a falar de pessoas com formação?

P7- Não, não estamos a falar de pessoas com formação…sem formação…

P8-Com formação então era…

P10- E depois pedem tudo, os direitos, pronto, a segurança social, subsídio de natal, subsídio de férias…

P8-Eu tive uma senhora uma senhora a ajudar-me, mas ia só de manhã, duas horas de manhã para me ajudar a esta altura, que nunca tive ninguém a não ser quando a minha sogra acamou… Teve um ano e tal acamada e eu não conseguia tratar dela, e então essa senhora ajudava-me, portanto,  na higiene diária, mas ia duas horas por dia de manhã, aos fins de semana não ia e eu pagava-lhe 600€ por mês… Até que esteve um ano e depois tive que desistir porque não conseguia suportar mais!

P11- Pois!... Horrível! Eu fui operada à coluna, não tive ajuda de ninguém, eu é que tratava do meu marido, por isso não fiz recuperação nenhuma… Na altura eu dava banho ao meu marido, ele pesa 90 e tal quilos e mede 1 metro e 80 cm, e o meu marido vai e eu vestia-o e não sei quê, eu saí do bloco operatório, eu fui operada às duas horas, saí no outro dia às 10 e meia, vim para casa e comecei logo a tratar do meu marido, não tinha ninguém…

M-  Já que estamos a falar de questões de dinheiro, porque esta pergunta aconteceu num dos outros *Focus Groups*, que é quanto é que vocês calculam que seria uma verba confortável para vocês poderem garantir o cuidado com os vossos familiares, mas também, mantendo alguma vida própria, mais qualidade de vida para vocês, estamos a falar de quanto? 1000€ chegaria? Falou em 600€ só por duas horas, não é?... O quê?...

P10- Eu acho que não, eu acho que para ser ter vida própria tem que se ter mais que 1000€, porque tem de se contratar alguém, não é? Porque deixamos de ter vida própria… Mesmo, com dinheiro, a gente deixa de ter vida própria, portanto, se ou temos realmente dinheiro para contratar alguém e para ficarmos confortáveis, ou então ficamos na mesma!

P11- Pois, a minha reforma e do meu marido são 1000€… Porque eu, a minha reforma e do meu marido são 1000€, só para medicamentos, só para o meu marido são 150€ por mês, fora os meus, que eu já não estou a contar com os meus!

P10- Pois!

P11- Agora como é que eu posso por uma pessoa em minha casa a pagar 1000€, o que é que eu vou, eu vou viver do quê?

P7- Há aqui um problema grande, eu acho, de reformas, da maior parte dos portugueses que são miseráveis, e 500€ já é muito dinheiro, cuidado, porque já me têm dito 500€ e pronto…

P11- E descontei bastante!! E descontei bastante!!

P7- E portanto, eu acho que o nível de reformas é muitíssimo baixo e depois, tudo o que é preciso para, as pessoas vivem cada vez mais tempo e com a longevidade vêm problemas, e depois ao…, tudo o resto, as estruturas, ou as pessoas que podem tomar conta dos idosos, os valores não são adaptados ao dinheiro que as pessoas têm, portanto, eu nem sei como é que… Porque eu é a minha vote, e nós todos sabemos que quando estamos nesta situação somos mais atentos ao que, a outras pessoas que depois partilham coisas connosco, e as coisas estão, há pessoas em situações muito desesperadas!

P11- Ah se estão!...

P7- E isto não vai melhorar porque cada vez há mais velhotes e o país não está a melhorar de maneira nenhuma, portanto, eu não sei, eu não sei…

M- Mas, especificamente, se pensarem nas várias tarefas que fazem ao longo dos dias e os dias repetem-se, não é? Quais são as tarefas que, em que precisariam de mais ajuda? Estamos a falar, alguns de vocês ficam cá, o familiar fica aqui durante uma boa parte do dia, não é? Portanto, estamos a falar de que tarefas, em que tarefas é que precisariam de ajuda?

P9- Eu a principal, e depois há uma, é se por exemplo, eu adoeço, suponhamos… Tenho qualquer coisa, mesmo sem ser grave, qualquer doença e não tenho ninguém que durante as horas que ela não está aqui, possa tomar conta… portanto, se houver, não sei, isto é um exemplo, uma (nome de instituição exemplo), uma instituição qualquer, que arranjasse, num caso desses porque até agora eu tenho conseguido sozinha resolver o assunto e pelo temperamento dela e a maneira de ser dela é isso que ela pretende…

M- Porque em tem bom temperamento, não é?

P9- Mas se eu adoeça, não é? Como é que ela, às horas que ela sai daqui que é ótimo, ela está aqui muito bem, satisfeita, com muito boa vontade, portanto essa parte, ótimo, está resolvido… Agora estou é sempre, constantemente, naquela aflição, dê-me qualquer coisa, não havia um processo de ir alguém por, não estou a dizer por uma grande doença, digo uma pequena doença, uma gripe forte, suponhamos, ela não pode ficar sozinha durante aquelas horas… Se não havia um processo de haver qualquer…

M- Apoio….

P9- Apoio…

P7- E na teoria há, a misericórdia tem esses apoios, e eu sei porque eu tenho andado… Mas é em teoria, porque na prática eu acho que a misericórdia está completamente…. É a sensação que me dá, não têm capacidade para fazer face… E isto é muito…

P11- Em teoria, pois…

P10- Eu quando foi da minha mãe, telefonei para a Associação (nome da instituição), até hoje… ainda estou à espera de respostas…há anos! Portanto … [risos]

P11- Pois, eu sou sócia, eu sou sócia, também não me fizeram nada, eu sou sócia…. Foi a minha filha que me inscreveu lá como sócia…

P10- Pois!... Claro… Nada, está a ver? A senhora é sócia, eu nem sequer me pus sócia, vi logo como é que aquilo funcionava, pronto…

M- Como é que vocês fazem quando estão doentes? A P9 estava a dizer, nunca teve uma gripe este ano?

P10- Esta senhora, coitada!

P11- Olhe, eu não posso estar doente!

P9- Eu graças a Deus, há dois não que não tive, tenho conseguido pronto, foi o meu caso, não é? Com a maior das sinceridades, não quer dizer que de repente não tenho qualquer coisa, mesmo que não seja grave, se for grave, terá de ser resolvido também de outra maneira, mas que me, houvesse alguém, um processo para eu poder pedir auxilio para ir, mas era mesmo uma coisa certa, não é a gente pedir estar à espera que nunca mais apareça… É minha preocupação maior…

M- Há pouco ia dizer qualquer coisa, que no seu caso também é assim?

P12- É exatamente igual, porque tenho eu de tratar de tudo, onde, há pouco falava-se em valores, a reforma dela são 400€, logo aqui ficam 300€, fica com 100€…

P10- É como a minha mãe…

P12- Já tudo referente ao mesmo, teve de entrar no desemprego mais cedo porque atribuíam-lhe uma depressão, andou “n” de anos a tomar comprimidos para a depressão e está neste estado, uma cozinheira ali dos maristas que não sabe cozinhar, tenho de ser eu a fazer tudo que ela…

M- Eu ia-lhe perguntar isso, é o único homem aqui, isto para os homens depois ainda há outras complicações, não é? Portanto, tradicionalmente, estamos menos habituados a fazer certas coisas, não é?

P12- No meu caso tudo, porque ela é que tratava de tudo… Encarregava-se de tudo!...

P9- Se calhar não é, porque eu não sei cozinhar! [risos]

M- Como é que fez essa transição?

P12- Complicado, mas devagar…

M- Teve que aprender?

P12- Exato!

P9- Mas olhe, que o meu é capaz de ser pior, porque eu não sei cozinhar!

M- Não sabe cozinhar?! [risos]

P9- Comecei a cozinhar aos 81 anos, foi que ando ela adoeceu, até lá não tive necessidade, tinha, tivemos sempre empregada, não é? Depois ela, depois de a minha mãe morrer, ela cozinhava muito bem, quando adoeceu, foi a primeira coisa que ela perdeu, não sabia fazer o comer e foi quando eu comecei… Portanto, o problema aí se calhar ainda é pior! Bem, mas isso resolve-se, a pessoa comendo, não come melhor, come pior!

M- Mas deixei-me voltar à pergunta que fiz há pouco, de outra maneira, quais são as tarefas que são mais difíceis para vocês? No cuidar dos vossos, o que é que é mais difícil?

P10- Eu no meu caso, por exemplo, a minha mãe, mesmo assim, agora está a ser difícil porque por exemplo, esta noite, às quatro e meia da manhã, eu já não dormi mais…

P8- Pois…pois…

P9- Acontece-me muito…isso acontece-me…

P10- Pelo menos, uma vez por semana eu tenho esta situação!

M- Mas ela acorda?

P10- Acorda, e depois não tem a noção se é de dia, se é de noite!

P9- É, não é? Não têm noção das horas…

P10 –Não têm noção…

P9- E depois: “Não são horas de eu me levantar?”, “Não, é uma hora da noite ainda…”, “Ah, eu julguei que era já de manhã” … Mas depois nós já não conseguimos dormir!...

P8-Exato! Pois! Pois!

P10- Pois… Isto é muito complicado, depois eu já não consigo dormir, não é?

M- Também lhe acontece?

P10- Este fim de semana então foi para esquecer!

P9- Pois nesse aspeto é complicado…

P8-Sim mas eu é a maioria, todas as noites, sobretudo o meu sogro, pronto ele já não sabe fazer a higiene quando vai a casa de banho e então todas as noites, ou o meu marido ou sou eu, que nos levantamos porque ele a partir de, ele dorme entre as onze, nós damos-lhe um iogurtezinho, umas bolachas, e depois à noite, ele dorme entre as onze e a uma, uma e meia consegue dormir bem, depois a partir daí é para esquecer… Ele levanta-se, vai a casa de banho, fica todo sujo, depois suja a cama toda, depois senta-se no sofá porque nós fizemos, nós para os recebermos, a nossa sala transformou-se na suite deles, mandamos fazer uma casa de banho na sala…

P10- Pois, passou-se o mesmo com a minha mãe este fim de semana, fez chichi na cama…

M- Tiveram de fazer obras? Tiveram de fazer obras?

P8-Tivemos de fazer obras, foi a suite que ficou para eles e depois pronto, ele agora está ali, nós temos o nosso espaço, ele é que anda constantemente pela casa toda…

M- Eu se calhar ia só pedir para quando uma pessoa estiver a falar não falarem porque se não, na gravação não conseguimos ouvir nada…

P10- Ah está bem… [risos]

P8-Portanto, ele de noite circula pela casa toda, vai ao escritório, vai ao nosso quarto, acordamos com ele no quarto a acender as luzes todas… E depois tudo sujo, e depois ou é o meu marido ou sou eu que temos que andar de noite a limpar a casa, a limpar, a mudar a cama, porque, entretanto, ficou toda suja…

M- Portanto, é como voltar a ter um bebé…

P8-É completamente! É mesmo!

P11- É!

M- E mais? Mais?

P8-Ou pior ainda! Porque um bebé não se levanta, não é? E não anda pela casa toda. Mas já ela era a mesma coisa, portanto…

P7- Pois muito pior! Não tem o lado lindo dos bebés, não é? Porque é…

P11- O meu marido também vai…

M- É ter um bebé, sem o ar lindo do bebé… Não é?

P11- É mesmo um bebé, o meu marido também já não faz quase nada, já não se limpa, não…. Só sou eu que tenho que o lavar…

M- Portanto, a higiene pessoal é a parte mais difícil…

Todos os participantes- É, é…é muito difícil!...

P11- Sobretudo e o vestir, o vestir e o calçar…

P7- Sim sim…

P11- Vestir e calçar é muito duro, porque a gente está a vestir… Se está a vestir a parte de baixo, quando está a vestir a de cima já ele está a despir a de baixo…

P10- Pois…[risos] O que uma pessoa passa…

P11- E anda, anda durante a noite, acende as luzes todas…

P8-É…. É…

P11- Nunca mais tive uma noite sossegada…

M- Ok…

P11- Depois já não se consegue deitar, porque já não tem noção, fica sentado na cama… Depois vou lá, levanto-me e vou lá deitá-lo…

M- Agora, na opinião do homem aqui do grupo, qual é a parte mais difícil? Qual é a tarefa mais difícil?

P12- Para mim é a questão da roupa e de cozinhar, pronto, cozinhar ainda vai, a roupa é que é pior porque ela é que tratava de tudo… Tudo… Às vezes experimento: “Passa-me essas calças”, ela nem sabe pegar no ferro…

M- Ok, ok… Falou de uma coisa importante, que é a adaptação da casa, teve que fazer obras por causa de… Já foi por causa dela ou… por causa dos dois?

P8-Dos dois, eles vieram os dois, nos tínhamos, a nossa casa é um T2, portanto, tínhamos dois quartos, já para se alguém, pronto, visitas enfim, e tínhamos a sala que era uma sala grande, e então para os ter, achámos que tínhamos de ter uma outra casa de banho porque eles já tinham alguns problemas, em termos de higiene, achámos que era melhor outra casa de banho e fizemos na sala uma casa de banho, o quarto ficou enorme de facto, e tivemos que arranjar uma forma para eles estarem bem não é?

M- Ok, ok, mais alguém teve de fazer adaptações em casa? Para…

P10- Não, o que eu noto é por exemplo, a minha mãe se vai passar um fim de semana a casa de um dos meus irmãos, ela estranha…. Há muita dificuldade…

M- Vem… Quando regressa ou na casa deles?

P10- Na casa deles tem dificuldade, porque ela não esta habituada aos espaços…

P7- Eles precisam de rotinas, é isso que eu noto, qualquer coisa…

P9- É, é… Isso deve ser geral!...A minha irmã também precisa…

P10- Precisam mesmo de rotinas, a minha mãe diz que isto é a escola… Que vem para a escola

P8- Aí o meu sogro também chama escola!...

P10- Por exemplo, mesmo ao fim de semana ela tem que vir para a escola…

P11- O meu diz que é o trabalho… “Vou para o trabalho!” (participante está com dores no joelho)

M- Ele diz que é o trabalho?

P10- Ela diz que é a escola…

P11- Ele diz que vem para o trabalho, o meu marido gostava muito de pintar, o meu marido era um autodidata, lia muito, tenho quadros lindíssimos feitos por ele e então gosta muito de estar aqui a pintar, diz que é o trabalho…

M- É o trabalho…

P10- Pois, está a ver? Pois!...A minha mãe é a escola, pronto…

P11- “Amanhã não há trabalho?”, “Não, amanhã é sábado” …

P10- Pois!...

P9- A minha é uma coisa ou outra, ou é trabalho como aqui lhe dão exercícios para fazer, diz que é trabalho, outras vezes, já é escola, porque os outros meninos não sabem nada, lá está o que eu já disse, eu era a melhor!...

P10- Noto que as situações são as mesmas, as perguntas são as mesmas, as faltas de memória e as alucinações é precisamente igual, é engraçado como…

P8-Sim é…

CM- Vê a sua situação noutras situações?...

P10- É verdade, é verdade!...

P7- Eu estou tao mal como vocês…

P10- Pois…

M- É outra fase, não é?

P7- É, a minha mãe tem uma demência, a mim o que eu noto é em relação às tarefas e tudo, a minha mãe não me dá assim trabalho, deixou, não faz nada nada nada, não escolhe a roupa dela, antes pelo contrario, também é isto, “Isto não quero”, dá-me as coisas, manda tudo pelo ar e tal mas pronto, mas isso leva-se… Mas em termos de higiene pessoal, não toma banho sozinha, mas toma aqui, mas faz a higiene dela sozinha e faz questão de a fazer, que é o ótimo, não usa fraldas, que é fantástico…

P10- Ah, isso é ótimo…

P7- Portanto, nesse aspeto eu sou uma privilegiada, não, nisso continua até agora, muito bem. Para mim, não é  tarefas que me sejam difíceis, para mim o que foi difícil foi mesmo, eu alterei a minha vida, saí da minha casa, dizem: “Mas porque é que não a levas para tua casa?”, a minha casa é diferente, ela aqui tem mais condições, eu já tinha aqui as coisas organizadas que ela morou aqui a vida inteira e para vir, por exemplo, aqui ao centro de dia e tudo, e porque eu ao levá-la para minha casa tornava as coisas permanentes e gosto muito da minha mãe e quero fazer tudo pela minha mãe, mas eu saí de casa com 25 anos e não voltei nunca mais e pronto, e é normal…Pronto, quero que ela esteja bem e eu quero ter pronto… Portanto…

M- A sua vida…

P7- Eu vim para casa dela e isso é que acabou por me…. É mais complicado por causa disso, mas felizmente ela a esse nível, não… Não faz nada, mas também, não me põe grande carga, em termos de higiene que eu vejo pela minha cunhada…

P8-Por enquanto…

P7- Pois eu sei, eu sei… Todos os meus amigos me dizem que é um caminho, que vai lá chegar…

P10- Pois…

P8-Pois…

P7- Pois isso eu sei… Por isso eu quero ver se consigo resolver as coisas antes de chegar aí, mas a higiene eu acho, porque a minha cunhada também está com os pais em casa e ela fala que fica completamente de rastos com a higiene…

P10- É…

M- É a parte mais complicada…

Todos os participantes- É..É...

P11- Eu perdi 14 quilos…

M- Perdeu 14 quilos?

P11- Perdi 14 quilos…

M- Em quanto tempo, recorde-me?

P11- Num ano…num ano perdi 14 quilos e sou uma pessoa bastante doente, sou, já tive um enfarte, fiz um cateterismo, portanto, já fui operada à coluna, já fui operada às mãos, já fui operada aos pés, à vista, agora estou para ser operada outra vez à vista, é muito complicado, e estou a pensar porque agora quando eu for operada à vista como é que vai ser… Porque eu não posso fazer esforços, tenho duas filhas, mas estão com horários de trabalho muito complicados e muitas vezes elas coitadas, ajudam-me, mas nem sempre podem, não é? E depois os fins de semana, que eu sinto-me presa, nunca mais convivi, nunca mais tive vida própria…

P10- Pois, isso também é outra coisa que eu…

P8-É, é isso!...

P11- Os fins de semana para mim, é horrível!

P10- Uma pessoa deixa de socializar…

P8-Sim, completamente…

P11- Nunca mais me juntei com os meus amigos, nunca mais nada, nada…

P10- É…. É…

P7- Uma pessoa desaparece, é como se existisse para trabalhar, para fazer coisas, deixamos de existir como…e eu, como volto a dizer, tenho muita sorte… Mas sinto então, pessoas que estão noutras condições…

P8-Eu perdi 11 quilos no primeiro ano também, no primeiro ano em que eles foram lá para casa, para mim foi muito difícil, sobretudo a parte emocional, porque eles pediram-nos muito para irem para a nossa casa, porque por os dois num lar, nós não gostaríamos mas, vimos que seria a única opção, só que a minha cunhada não podia, de facto, ficar com eles também e eles pediram-nos muito para vir, porque ainda estavam bem na altura e também nos custava muito, só que depois quando vieram para casa, sobretudo o meu sogro, queria continuar a ter a liberdade que tinha quando estava, porque ele sempre foi muito independente, ele tinha, ele era arquiteto e era escultor e teve sempre uma vida muito independente, e queria continuar a poder fazer o queria. Ali em nossa casa nós como víamos que ele já tinha alguns problemas não o queríamos deixar sair sozinho, porque ele inclusive uma vez perdeu-se, pronto, e então nunca mais o deixámos fazer o que ele gostaria e ele começou a, logo no início, começou a… Ela tinha uma grande cumplicidade com ele também e então eu comecei a ouvi-los conversar e falavam, e ele só dizia que queria ir para casa sozinho e tudo aquilo era, foi horrível… O primeiro ano para mim foi terrível emocionalmente foi mesmo, eu chorava sozinha a ouvi-los… Depois ainda por cima estava sempre, não conseguia desligar, estava sempre a ouvir o que eles diziam e aquilo foi, foi muito chocante para mim, foi mesmo muito pesado… Emagreci os 11 quilos, até que uma vez foi o rebentar da tampa, e inclusive o meu marido teve de chamar o INEM (Serviço de emergência médica) porque eu estava absolutamente a passar-me…

P10- Logo dois…

P8-E foi muito complicado e então, optaram por, tanto ele como a minha cunhada, por arranjarmos um centro de dia, porque o lar era impossível arranjar assim de um momento para o outro…

P11- E também nós não temos possibilidades para pagar um lar…. Monetariamente…

P8-E eu fui aliviando, de facto, e também porque depois tive algum apoio emocional, para desligar completamente daquelas coisas e consegui, consegui de facto, com eles no outro centro de dia…

M- Ter algum tempo…

P8-Ter algum tempo para mim, mas o que estava a dizer há bocado, a nossa vida social desapareceu completamente, porque os nossos amigos não vão lá a casa, eu deixei de convidar as pessoas para ir lá a casa, eles próprios começaram a… nunca mais tiveram… Um almoço, um jantar de amigos…

P10- Os amigos não querem saber…

P11- Nada…nada…

P12- Afastam-se… As pessoas afastam-se…

P10- Eu costumava ir todas as semanas ao cinema, foi coisa que deixei de fazer…. Ir ao cinema com ela é impensável, deixei de fazer…

P8-Sim, nós deixámos de ir ao cinema, deixámos de…

P7- Porque eu também noto que o cuidador só fala do que faz, noto por mim e noto por outras pessoas, porque nós estamos obcecados, estamos sempre a falar do mesmo e sempre com aquela carga em cima e não há quem aguente, quer dizer, umas pessoas porque estão tão fartas desta realidade que ficam: “Epá, também que mariquice e tal”… Também não percebem que é preciso esse drama todo e outras porque também às tantas já estão um bocado fartas, porque isto também é cansativo para nós e para quem está a nossa volta porque é difícil de facto desligar…

P10- É quer dizer, isto por exemplo, este fim de semana, a minha mãe no domingo de manhã, logo de manhã acorda, fez chichi na cama, pronto, e com fralda, está a ver? Mas tudo bem…. Mudou-se a cama, dei-lhe banho, vestia e não sei que, depois resolveu andar o tempo todo a vestir e a despir-se… A vestir e a despir, o tempo todo… E eu assim: “Ó mãe, por amor de Deus, não faça isso”, sempre a vestir e a despir, houve uma altura que estava na sala e eu estava a fazer o almoço, resolveu ir tirar as calças em frente à televisão e a minha televisão é uma televisão grande, não é? E nova, ainda por cima, nova, ainda nem um ano tem, ela desequilibrou-se, caiu em cima da televisão e partiu-me a televisão toda…. Percebe? É que depois uma pessoa fica…

P8-É…

P10- Eu ainda estou a digerir isso, portanto, é natural que a gente depois se queixe, não é? [risos] Alguém tem de nos ouvir, não é? Aquele desabafo, no fundo é um desabafo que a gente precisa!

P7- E fale, claro que sim! Está é a realidade, mas é verdade…

P10- É que não temos mais nada, não temos mais nada!

P11- Mais nada, pois…

P10- Pronto, e lá telefonei aos meus irmãos e às minhas… Mas quer dizer, tenho que desabafar tenho que gritar, é um grito interior que uma pessoa tem, não é? Mas pronto, e para ela não fez nada…

M- É...

P10- Pois! Hoje de manhã, quatro e meia da manhã acorda, já não dormi mais, depois quando me levanto, vou ao pão, eu tinha um pacote de pão de forma embalado, desapareceu! Eu não encontro o pão, eu não sei onde é que ela escondeu aquilo!

P11- Escondem, escondem…

P10- Desapareceu!... Não sei…

M- Isso é um aspeto interessante que ainda não tinha surgido nos outros *Focus Groups* que, pensando em termos de custos também, que são os estragos, não é? Estragar uma televisão, há mais relatos desses? Coisas que…

P11- Eu felizmente, por enquanto ele não ainda estragado nada…

P12- Comigo é mais a loiça…

M- A loiça?

P12- De um momento para o outro é um copo, que eu tento com que ela vá fazendo as coisas: “Olha lava-me a loiça”, está ali… “Mas põe produto na esponja”, lá vai esfregando, às duas por três, lá vai aquele prato, pronto, depois… “Deixa estar, não faz mal” … Para a tentar manter ocupada, mas pronto, é os copos é os pratos é aquilo que vai… Mas como dizem que é bom manter…

P10- Mas olhe que a loiça não vai conseguir, eu se fosse a si desistia em relação à loiça, é preferível mandá-la fazer a cama, por exemplo…

P9- Eu desisti…

P10- Em relação à cozinha, não vale a pena, a minha mãe já não faz há anos porque não dava, depois partia, lá está…

P12- É, é…

P10- Partia… Depois era detergente, era o frasco todo de detergente, pronto, não dá, mas ainda hoje eu tento que ela faça a cama dela, não é? Pronto, mas é a única coisa… Mas eu ainda há pouco tempo, agora só, eu ouvi, não sei se sabe quem é o Miguel Seabra que foi ator, e ainda é, eu não sei se ele também não é psicólogo ou psiquiatra, não sei…. Há assim qualquer coisa…

M- Eu conheço um Miguel Seabra… Agora não sei é o mesmo!...

P10- E eu vi uma entrevista dele, porque ele tem muita gente com Alzheimer na família e achei interessante, e então ele estava a dizer que uma coisa que aprendeu foi três coisas, com as pessoas, para lidar com pessoas com Alzheimer, uma é o afeto, porque realmente o afeto é espetacular, a minha mãe por exemplo melhorou imenso assim que saiu do lar, portanto, foi o afeto, a outra é a música, tentar ouvir, pô-los a ouvir a musica que eles gostavam, a minha mãe por exemplo adorava fado, não é? E então ponho-a a ouvir o fado e ela fica ali, realmente aquilo relaxa, não é? E é uma coisa que ela gosta, e depois é dizer que sim a tudo!

P7- Sim, não contrariar…

P10- Porque não vale a pena contrariar, e eu contrariava, porque achava que assim que assim conseguia trazê-la à realidade, mas não é impossível, quer dizer não vale a pena…

P7- Porque ainda os vimos como se eles pudessem fazer de outra maneira, mas não podem, até nos percebermos que, é difícil manter outra maneira…

P10- É, não vale a pena, a minha mãe para ela, neste momento está tudo vivo, é a mãezinha que está viva, é os irmãos estão todos vivos, o médico quando a vê, “Ó Dona (nome do doente), como é que põe tanta gente lá em casa? Como é que consegue?”. Portanto, não vale a pena contrariar de facto, e eu contrariava, portanto, ainda mais nervosa ficava, não é? Ficava eu e ficava ela! Comecei a dizer que sim a tudo e já não me chateia! Não me ralo!

P9- Comigo é a mesma coisa! Tal e qual! Tal e qual! Eu até gostava, gostava de saber qual o melhor, qual a melhor maneira da pessoa, portanto, de fazer, de lhe explicar que a pessoa já morreu! É o pai, é a mãe, são os irmãos…

P10- Ah pois, eles não aceitam…

P9- É que eu não, cientificamente vamos lá, não sei como é que hei-de explicar, eu calmamente, já tenho explicado!...

P10- Não vale a pena explicar…

P9- Pois, mas tem de se responder, porque ela espera por uma resposta!

P10- É dizer que sim, diga que sim…, Mas por exemplo, pergunta pela mãezinha…

P9- Que sim como? Olha o (nome de familiar) está ali…

P10- Ah, pois está!...[risos]

P9- Eu tenho de lhe dizer que não está, pronto…

P7- Talvez lembrar, falar sobre essa pessoa, não é? Falar coisas que…

P9- Ah pois, eu tenho tentado, tenho uma paciência por temperamento, não é gabar-me, mas por temperamento, tenho uma paciência, tenho muita facilidade, mas nisso, tenho muita dificuldade porque ela, “Olha, é o (nome de familiar), é o (nome de familiar), os meus irmãos, é o Pai é a Mãe” … Ainda ontem, “Olha a (nome de amiga) está ali” que era uma amiga nossa que já morreu há alguns 10 anos!

M- Portanto, para vocês seria importante também terem mais apoio ao nível de saberem como é que devem falar com eles, como é que devem interagir, isso também é outra coisa que falta, não é? Uma pessoa que desse umas aulas…

Todos os participantes- Sim, sim...

P9- Eu tenho muita dificuldade...

P12- Isso seria excelente!

P10- Eu aprendi imenso e eu ter visto aquilo foi por acaso, foi por acaso...

M- Em que é que, no seu caso, em que é que gostaria, o que é que gostaria de aprender? A P9 falou de falar no conceito de morte, não é? No seu caso?

P12- Gostaria de aprender tudo porque uma pessoa começa do zero! Começamos do zero! E tudo aquilo que me dizem que faz bem, tento fazer tudo, ela, é raro estar em casa, há uma refeição, vamos dar uma volta porque diz que faz muito bem andar a pé, vamos dar uma volta, chegamos a andar 10, 12 quilómetros... Em junho ia com ela para a (localização), fazíamos à beira da água, para baixo e para cima, para cima e para baixo, 6 quilómetros... Mas, tê-la ocupada! Andar com ela para um lado e para o outro para, porque em casa não vale a pena...

P11- O meu marido não anda, não quer andar! Não quer andar! Diz que vai cair, que vai cair! E eu não saio porque ele não quer andar!

P10- A minha mãe também é um caco... [risos]

M- No seu caso estava a dizer que não consegue pô-lo a ouvir música, percebi bem?

P11- Ele gostava muito de ouvir música clássica, dançava e cantava também, ele ainda ontem...

P10- Então experimente!

P12- Essa para mim também é novidade!

P11- Eu ainda ontem disse, “Ó (nome do doente) queres ir ouvir um bocadinho de música?”, “Não, quero estar aqui” ... Está ali em frente à televisão, depois adormece...

P10- Mas se o puser na sala, se ele tiver na sala, a desenhar ou a pintar e se puser ao mesmo tempo a música clássica ele relaxa!

P11- Ele tem o escritório, ele tem o escritório dele que as filhas lhe compraram numa casa de desenho, onde ele desenhava e eu comprei-lhe daqueles livrinhos para ele desenhar...

P10- Sim, sim, sim...

P11- Já tentei pô-lo lá até com a música ligada e ele não vai...

P10- A minha mãe deu imenso resultado!

P11- Ah e depois não posso contrariar porque ele depois fica... e quando não se torna agressivo, ainda foi na quinta-feira, quando ele foi na carrinha, já vinha no meio da rua e diz que vinha aos gritos “Chamem a polícia, querem-me matar, e não sei quê e não sei que mais!”...

P10- No fundo, a gente precisava também de uma formação profissional! [risos] Que é mesmo assim!

P7- Claro!

P10- E até para tirar dúvidas e até para nos ensinarem porque isto quer dizer, é um filho, mas não é, quer dizer, a idade é outra, é diferente...

P12- Tudo aquilo que a gente conseguir apanhar entramos!

P10- Claro! Pois!

P8-Eu penso que não seria uma coisa muito complicada!...

P12- Eu a minha médica disse para por uma luz de silêncio na casa de banho que eu acordava muita vez, ela de pé no quarto, sem saber para onde é que devia de ir, portanto tenho uma luz de silêncio na casa de banho que ilumina o corredor, ela quando se levanta, é para ali!

P10- Claro, claro, tem de ser!

P11- O meu marido tem uma luz de presença no quarto, e o quarto dele está mesmo ao lado da casa de banho, já precisamente por isso...

M- Ia dizer?

P8-Pois, eu ia dizer que penso que não seria muito complicado para estas situações porque eu também estava à nora, completamente, foi uma situação em que uma pessoa fica sem saber como é que há-de ir reagindo e eu penso que, sei lá, uma linha telefónica, se calhar seria o suficiente, penso que não teria grandes custos para o estado, mas uma linha telefónica, já não digo a internet porque há pessoas que ainda não têm à vontade com a internet, mas uma linha telefónica a quem pudéssemos pedir um apoio, “Olhe está a acontecer isto, como é que eu posso reagir? Como é que...?”

CM- Isso existe, isso existe...

P8-Eu não conheço!...

CM- É a linha de apoio da (nome da associação), é a linha (nome da linha telefónica), posso dar-lhe esses contactos, tem o atendimento em horário, das 9h às 17h.

P8- Mas é a linha da Alzheimer, mas por exemplo, os meus sogros não tinham Alzheimer, nunca foram, pelo menos nunca foram diagnosticados com Alzheimer, era demência, eu por exemplo, não sabia que podia consultar a linha da (nome da associação)! Não é?

P11- A demência é caminhar para o Alzheimer!

P10- A demência é muita coisa!

P8- Mas olhe, é uma coisa que eu desconhecia!... Eu se calhar, eu cheguei muitas vezes a ligar para a saúde 24, mesmo sem ser uma questão de doença, cheguei a ligar para a saúde 24 porque era um número que eu conhecia! Em que podia ter algum apoio!

M- Uma coisa que temos reparado nos outros *Focus Groups*é que o facto de termos este *Focus Group* aqui faz com que vocês troquem aqui algumas informações entre vocês...

P8-Exato!

P10- Pois, porque não há!

M- Nunca.... Vocês não costumam estar com outros cuidadores, não costumam encontrar outros cuidadores?... Mesmo aqui por exemplo? Mesmo aqui não há, o pessoal não se encontra ali na sala de espera...

P8-Não... Não...

P10- Não...

P7- Não... Não...

P12- Não, porque um entrega, saí, o outro chega...

P10- É....Não...

Todos os participantes- Não...

M- Ok, ok...

P7- Não há esse...

P10- Agora digo-lhe uma coisa, era excecional se houvesse mais centros de dias como este, para mim foi um alívio, não ter a minha mãe 24 horas comigo!... Para mim foi muito bom! Até para poder fazer a minha vida!

P11- Ah sim!

P9- Ah sim!

P8 e P7- Sim sim!

M- E portanto, e se eu percebi bem à pouco, a grande vantagem deste é que tem a porta fechada...

P10- É fechada, para pessoas com Alzheimer, com demência e Alzheimer é de porta fechada... Mas têm atividades, têm ginástica, estão ao cozinhar... estão, têm a missa, pronto, quer dizer, passeiam, vão a espetáculos, até vão aos espetáculos do Lá Féria! Portanto, a minha mãe neste momento tem mais vida social do que eu! [risos]

P7- Sim...pois não estão ali em frente à televisão!

P11- Pois é! O meu marido ainda foi, na sexta-feira...

P9- É verdade!

P10- E é devido a este centro de dia, e isso é muito bom, agora é pena realmente no país não haver mais, percebe? É pena!

M- Como é que vocês...? Nós já estamos a ficar com pouco tempo, mas eu queria perceber um pouco melhor como é que vocês se auto cuidam, não é? Como é que é cuidam de vocês próprios? Já vimos que a vida social está muito em baixo, não é? O que é que fazem para manter um pouco de higiene mental, o que é que fazem?

P10- É.…ainda hoje para vir porque não dormi toda a noite...[risos]

P7- Eu não largo o meu ginásio...

M- Ginásio? Ok...

P7- Sim.... É daquelas que eu não largo, não largo, não largo... pronto...

P10- Eu faço ginástica...

M- Consegue fazer tipo uma hora por dia, consegue fazer isso, não?

P7- Não faço todos os dias, mas tento fazer mesmo que não consiga ir ao ginásio... Uma corrida ou uma caminhada, qualquer coisa... Preciso de isso, mesmo!...E pronto, basicamente é o que eu tenho feito...

M- Já agora, no seu caso, que está noutra fase... Ainda continuando com a P7, como é que faz com os amigos, consegue sair com os amigos?

P7- Não... [risos] Não! Não! Afastaram-se muito, há amigos meus que já passaram por situações complicadas e tenho mais empatia, percebem melhor, mas também estão com problemas com os pais, os que ainda têm os pais, o que eu vejo é que assim na minha faixa etária está tudo com dificuldades. Os que não têm estas situações e com quem eu saía, e saía muito, sempre fui uma pessoa que gostava sempre de sair, para além do trabalho gostava de sair, eu acho que não têm pachorra para me aturar, basicamente, porque eu estou chata, estou chateada, estou irritada, estou sempre a protestar com isto e com aquilo e a falar disto e daquilo, disto e daquilo não, disto só!... E eles chateiam-se um bocado e eu...

P9- Afastam-se... As pessoas...

P12- Afasta-se tudo!...

P10- Isso é porque as pessoas não entendem isto...

P7- Não, pois não?

P9- Não, não.... Só quem passa por isto...

M- Não entendem?

P10- As vezes não entendem a nossa opção, porque é que a gente ficou a tomar conta da mãe ou do pai ou.... Porquê? Não entendem isso!

M- E sabe responder a isso?

P10- Eu sei porque sabe que eu se calhar sou uma pessoa diferente de qualquer pessoa daqui, porque eu já tenho aqui muitos anos de prática, porque a minha mãe agora tem Alzheimer, mas a minha mãe é esquizofrénica, portanto... [risos].... Sei perfeitamente como lidar, não é? Com estas doenças de cabeça, não é? Isto para mim é natural, agora, fui sempre muito agarrada à minha mãe, e sempre houve o afeto, sempre lá está, mesmo quando casei e tive filhos, a minha mãe viveu comigo, portanto, a minha mãe andou sempre atrás de mim.... Há aqui uma ligação nas duas, mas as pessoas também não entendem isso, não é? Porque a maior parte, poe-a no lar e pronto, e está despachado...

P7- É...

P9- É.…. As pessoas, tanta tanta convivência que nos tínhamos, tantos amigos, estas coisas, parece mentira, acho de facto...fantástico...

P10- E hoje como é que...

M- Também lhe aconteceu isso? Os amigos também se afastaram?

P10- Afastam-se, afastam-se...

P9- Eu hoje estou sozinha com a minha irmã...

P12- Doutor peço desculpa, tenho...

M- Muito obrigado por ter vindo...

P12- Adorei e pena não haver mais situações destas que é muito bom, excelente! Um bom dia para vocês.... Peço desculpa, mas...Tudo de bom!

Todos os participantes- Bom dia!...

P10- Não faz mal... Não faz mal.…, mas agora quer dizer eu não quero dizer com isto que...

P9- Também se calhar já não demorará muito...

M- Diga diga?

P9- Se ainda demorará muito?

M- Não, não estamos quase a terminar

P10- Eu não quero com isto que as pessoas que põem os pais nos lares que sejam... Que gostem menos ou mais do que eu, não é? Não é isso! Nada! Não tem nada a ver! Agora mete-me impressão! Mete-me impressão!

P8-Sim, claro, claro... É isso, era isso que ia dizer e isso é uma coisa que não acho que... Porque há muitas razões, há muitas situações e...

P10- Não, lá está, eu se tivesse 5000€ para pôr a minha mãe num lar, pagar 5000€ não havia problema nenhum, porque é um espetáculo! Aquilo é… é pronto... Aquilo é um hotel, não é? É muito bom, agora, a minha mãe tem uma reforma de 400€, não é? Se vai pagar de lar 1000€ é uma vergonha!! É uma vergonha!!

P11- 1700€, 2000€, é uma vergonha o que me pediram!

P10- É depósitos! É depósitos, isso deviam de realmente tomar atenção a isso! E lares com alvará

[risos] e que...lares com alvará...

P9- Isso eu não seria capaz de fazer...

P7- E acho que é obrigatório ter...

P10- Lares com alvará, eu vi lares que não tinham alvará em muito melhores condições do que os que têm alvará! Atenção! Portanto!...

M- Portanto, para vocês está fora de questão os lares...

P10- Está fora de questão também monetariamente, percebe? [risos]

P11- Aí eu está, para o meu marido está, eu prefiro que me paguem uma pessoa para lá ter em casa, a (nome da instituição), onde a gente vai, hoje falta-me aqui este papel, amanhã falta aquele, depois falta outro, é só burocracias!...

P7- É, mas olhe, insista, que eu estou...

P11- Insista, eu já ando há dois anos!

P7- Pronto, eu estou com esperança que por agora consiga...

P11- Já ando há dois anos, que é a minha vida e já lá foram a casa fazer uma avaliação..., mas...

P10- Depende do lar, eu se encontrasse um bom lar com a verba que a minha mãe pode pagar e que nos possamos dar tudo bem, mas o problema é que não há...

P11- Não, não encontra, não encontra...

M- Não há...ok...

P8-Sim, eu por enquanto da minha parte também, ele irá ficar connosco porque não temos mesmo possibilidade nenhuma de qualquer lar, mas se..., mas se...

M- Como é que, como é que cuidada de si própria? Falou-me que teve algum apoio também, em termos de, se eu percebi bem, psicologia, talvez, ou percebi mal?

P8-Não, não cheguei a ter consulta de psicologia, não... Mas através da médica de família, apoiou-me bastante...

M- Ok ok …

P8-E depois com o ioga, vou ao ginásio...

M- Ioga.... Ok...

P8-E comecei, porque como os pusemos no centro de dia, consegui, porque eu praticava já ioga, só que quando eles vieram lá para casa deixei de conseguir porque estava com eles...

M- Deixou de conseguir.... Ok, e com este bocadinho que eles estão cá, já consegue!

P8-Sim, assim que eles entraram para o centro de dia consegui ter o meu espaço para o ioga, ir ao ginásio e consegui que isto (faz sinal para a cabeça) voltasse a funcionar, acho eu, normalmente [risos]. Mas confesso que se fosse hoje, sabendo já o que sei, não teria tomado a decisão de ficar com eles.

M- Não teria?

P8-Não teria.... Foi uma mudança drástica na nossa vida, foi o deixarmos, até mesmo como casal.... Foi muito, muito complicado... E eu cheguei ao ponto de dizer “Ainda bem que não tivemos filhos” porque haver a reação com os pais, se fosse com os filhos, já estaríamos separados há muito tempo, que foi a esse ponto, sim, porque de facto, é aquela situação, a mãe deixa fazer, mas depois o pai vai dar miminhos ou não sei quê, e eu aqui nesta situação em que eu dizia, “Não faças assim”, ele fazia precisamente o contrário...

M- Ele? O seu marido?

P8 -O meu marido, sim... E havia aqui de facto grandes contradições em termos de, de gerir as situações, e hoje eu diria que não, que não aceitaria...

M- A P7 viveu isto de maneira diferente, a mãe não foi lá para casa, é a P7 que...

P7- Não, eu fui para casa da minha mãe, sim, sim... Que é mau também, pronto, eu não sou casada, mas vivia com alguém e também é complicado, por acaso é uma pessoa que é educada, fantástica, mas quer dizer, isto é impossível não mexer com a nossa vida de uma maneira...

M- Não ter efeito...

P7-… Que pessoas como vocês compreendem e para os outros é difícil de compreender, pronto! Porque...pronto.... É muito complicado!

P10- É, para os outros é difícil... Eu por exemplo, eu tive depois uma situação, que também, eu acho que também ajudou um bocado estas minhas decisões também, que o psiquiatra da minha mãe, o Doutor A, uma vez virou-se e disse assim: “Sabe que metade do tratamento da sua mãe é o afeto, se a sua mãe for para um lar, vai num instante” ... E isso trabalhou muito na minha cabeça, percebe?

P7- Sim, estou, eu compreendo, é como vos digo, a minha está nem há quinze dias neste sítio, não é maltratada que eu sei, vou lá todos os dias, mas noto que não sei, está diferente, assim meio... Porque aquilo é assim um ambiente muito mais impessoal

M- Muito parado...

P7- E estão lá pessoas que de facto, estão em condições muito más e ela também ficou chocada, até eu fiquei chocada de olhar para as pessoas, porque custa, não é? E ela então que já não está bem da cabeça, aquilo faz-lhe impressão estar ali naquele ambiente... Portanto, eu estou desejosa, mesmo que a Misericórdia não me de resposta até ao final da semana, eu lá vou fazer mais um esforço! Pronto!

M- P9, a P9 ainda continua a fazer o seu trabalho, não é? Como contabilista... E o que é que faz mais para cuidar de si própria?

P9- O meu trabalho, estou ocupada...ah...nada... dedico-me a ela quando a venho buscar, não tenho esse problema, a vida social talvez até pela idade, já não ligo muito, já estou sossegadinha em casa...

M- Mas tem hobbies? Tem algum hobbie que a entretenha?

P9- Não, não tenho nenhum, sem ser o trabalho não tenho, hobbie em si, não tenho...

M- Ok...

P9- Ela ocupa-me muito tempo, e esse tempo é o suficiente, vivo para aquilo, não faço sacrifício nenhum, não, não faço com sacrifício, nem sinto que isso me está a causar algum prejuízo, por enquanto, vamos lá ver, não sei, pela idade é natural que comesse depois, claro que me canso, que fico confusa às vezes, mas consigo, tenho conseguido vencer essa parte...

M- E no seu caso?

P11- Eu já andei na hidroginástica e levava o meu marido, ao princípio, antes dele estar no centro e ele ainda teve uma semana, mais ou menos, depois começou a fazer coisinhas que parecia uma criancinha e já não conseguia tomar banho sozinho, tive de pedir a um senhor, no balneário para o ajudar, não é? Até que comecei, desisti dele comecei a ir eu e a levá-lo, ele ficava no cafezinho, aquilo tinha assim um vidro grande, até que ele me começava a desaparecer e eu já não, tive de desistir... Agora como tenho andado a fazer fisioterapia, agora a médica quer que vá fazer hidroginástica, como ele já está aqui estas horas eu vou aproveitar...

M- E faz isso...

P11- E vou fazer hidroginástica... Mas já estou a ser acompanhada por uma psicóloga, estou na psicologia em (localização), a médica de família já... Porque eu já estava com uma grande depressão [chora]…

M- Ok, e está a ser acompanhada, mas quê? Uma vez por mês? Uma vez por...?

P11- Eu fui agora, e agora tenho para o mês que vem nova consulta... No dia 11...

M- Uma vez por mês, muito bem...

P11- E é assim...

M- Ok... Eu não tenho mais perguntas, não sei se querem acrescentar alguma coisa, pensando nesta questão dos encargos, dos custos, aqui a CM está muito interessada também, tanto quanto possível, em quantificar custos, isso também é importante, pelo menos fontes de despesa...

P11- Que nos ajudem monetariamente, que nos ajudem! Eu pelo menos queria uma ajuda para pôr lá uma pessoa em casa, porque não está, não estou a pensar por o meu marido no lar...

M- Uma pessoa em casa mais no final do dia?

P11- Sim, sim, e por exemplo, aos fins de semana!

M- Aos fins de semana, ok...

P11- Durante o dia está aqui, não é? Agora a carrinha também vai buscá-lo de manhã e depois vai levá-lo à tarde que era eu que o trazia e levava. Mas os fins de semana para eu ter os fins de semana livres, para poder ir a qualquer lado!...

M- Entre finais de dias e fins de semana, o que é que seria mais importante?

P11- Aí, eu era os fins de semana!

M- Fins de semana? Um dia pelo menos durante o fim de semana? Ok...

P11- Sim, fim de semana, ou sábado e domingo, pronto...

M- E nos vossos casos, entre ajuda ao final do dia ou fins de semana, o que é que, como é que vêm a coisa?

P7- Eu fins de semana, sim...

P10- Eu é difícil, porque tenho irmãos mas no fundo só posso contar com um, porque uma emigrou e outra também está muito doente, a mais velha, portanto, só posso contar com o meu irmão, o meu irmão é um bocado difícil [risos] porque pronto, não sabe lidar bem com estas situações, portanto, agora quer dizer, por exemplo, o mês passado tirei um fim de semana prolongado, lá consegui, não é? Mas é assim...

M- É muito de vez em quando...

P10- É muito de vez em quando, não é? E as vezes quando preciso de ajuda, lá são os meus filhos ou assim, às vezes para poder ir ao cinema, tenho de pedir a um deles para ficar com a minha mãe. Eu já a levei comigo, mas ela não toma atenção nenhuma ao filme, não nada.... Fica impaciente porque quer sair dali, depois eu começo a ficar enervada, porque estou num sítio em que ela está a incomodar as outras pessoas, quer dizer, tudo isso é complicado...

P11- É como jantar fora, eu por exemplo, agora estive uns dias no algarve com as minhas filhas, fomos jantar duas vezes fora, e depois ele entra num, entra em pânico, que eu tenho de me vir embora e as filhas ficam no restaurante... Nunca mais fui jantar fora com as filhas...

P10- E depois não só isso, é que deixam de saber comer à mesa!

P11- Aí o meu marido, já não come, o meu marido lá vai comendo, mas sou que lhe preparo tudo, eu corto-lhe a carne toda... A comer a sopa, a tigela da sopa tem um pratinho por baixo, mas é metade que deita fora, sentar à mesa é um caso sério, primeiro que ele se sente na cadeira para a mesa!...

P10- Certas coisas é difícil estar.... Estar em família é uma coisa, agora estar a fazer social com amigos ou ir para restaurantes já é outra...

P11- Ah sim, pois! É, sim, sim...

P7- Porque as pessoas não gostam, as pessoas antigamente os velhotes eram uma coisa que a gente respeitava e admirava e hoje em dia é uma coisa que... e isso também é uma coisa muito má para eles, não sei se eles dão por isso... Para quem está com eles...

P11- Eu felizmente tenho uma família, as filhas e netos e tudo são, são cinco estrelas...

M- Vão ajudando...

P11- Vão e gostam muito do avô e fazem muita companhia e...

M- Ok...

P11- Mas é complicado, nós.... É complicado...

P10- É assim, isto ainda está aqui muita coisa para ter de se resolver, até os transportes, os transportes não estão adaptados à terceira idade...

P11- Não, não...

P10- E é imensa terceira idade a andar de transporte e não está adaptado até os degraus, não conseguem, é muito alto, é só pessoas de idade dentro dos autocarros sem lugar para se sentarem, é os maquinistas com uma velocidade, fazem travagens enormes e lá vão os velhos todos! Isto está tudo horrível, quer dizer, há aqui certas coisas que não está bem! Não está bem!...

P8-Pois não...

M- Têm de ser pensadas! Muito obrigado pela vossa...

CM- Eu gostava só de partilhar, esta questão dos transportes que a P10 estava a falar, nós falámos um pouquinho quando chegou porque teve uma avaria no carro, não é?

P10- Sim, eu tive uma avaria no carro e eu não moro em (localização), eu moro em (localização), portanto já tenho de pagar quase 200€ se quiser transporte da minha mãe, quem tem em (localização) não paga transporte... Quer dizer, 200€, então pago eu uma prestação de um carro, não é?... Com 200€...

CM- Com transporte estávamos a falar para aqui, para o centro, a carrinha...

P10- Para aqui, portanto, cada vez que o meu carro se avaria eu tenho de apanhar os autocarros...

M- Certo...

P10- Porque nem sequer metro dá para vir para aqui...

P7- Mas a Junta de Freguesia de (localização) não assume o transporte?

P8-Não, eu também sou de (localização) e não...

P10- Não, porque também se paga cento e tal euros de transporte, é muito dinheiro!...

P11- Eu consegui agora, a Junta dispensou agora uma carrinha e eu não pago...

P7- Pois, mas em (localização)...

P10- Mas é de (localização)? Pronto, mas é que eu moro em (localização)...

P11- Ah...

P10- Quem é de (localização), tem essas facilidades todas, porque isto está em (localização)... Em (localização)...

M- E portanto, agora o que está a fazer é, vem de transportes públicos normais, agora?

P10- Venho, não, eu agora já tenho o carro, mas eu um dia se deixo de ter carro, eu não posso ter a minha mãe aqui... Por exemplo!...

P8-Pois, pois...

P10- Percebe? É mais um problema que eu depois vou ter!

P8-Pois, eu se o meu marido faltar, acontece-me o mesmo! O meu marido é que nos traz e leva! Tráz e vem buscá-lo! E eu não conduzo!

P10- Pois! Eu tenho centros de dia ao pé de minha casa, mas não de porta fechada! Não há esta situação!

CM- E essa decisão tem, está relacionada com o preço do transporte?

P8-Não, mas, eu não conduzo, se o meu marido ficar doente, eu não posso trazê-lo...

P10- Mas moram aqui em (localização)?

P8-Em (localização)... Em (localização)...

P10- Pronto, então tem o mesmo problema que eu!

M- Mas só para perceber melhor, agora há aquele passe na área metropolitana que é 30 ou 40 euros, portanto, esse seria para transportes normais, os 200€ a que se refere é o transporte aqui da...

P10 e P8-É o transporte da carrinha...

P11- Para trazer para o centro e levar...Carrinha do centro... Eu felizmente não porque pertenço e a Junta agora, foi este mês, dispensou, disponibilizou uma carrinha...

P10- E depois não tem condições, os autocarros não têm condições...O metro não há aqui!...

M- Era isso que eu queria perceber, pronto.... Ok...

P10- O metro era mais fácil, para a minha mãe se movimentar, não é? Não tem degraus, pronto, há mais carruagens e isso...

M- Portanto, os transportes públicos normais para si não é uma possibilidade...Não...

P10- Não, quer dizer, mas para a minha mãe é complicado.... É pessoa que se desequilibra, os degraus são assim, quer dizer, até para entrar e sair para ela já é uma dificuldade, não é? Quer dizer...

P7- Claro, até porque é longe a paragem e tudo! Ter de fazer isto tudo... E depois fazer este caminho todo a pé, da paragem até aqui...

M- Certo, certo!...

P10- E depois ter de fazer este caminho todo a pé, não é?

P11- O meu marido não anda mesmo! O meu marido, é uma canseira para andar...

P10- E depois não e isso, é o autocarro fica na estrada de (localização) e ela tem de subir a rua toda para chegar a casa... Que a rua dos ??, que é tudo a subir, quer dizer, ela tem artroses nas ancas, tem muitas dores... Quer dizer, é uma situação, é que pedem muito dinheiro pela carrinha...

P11- É horrível...

P10- O ideal era realmente, haver mais centros de dia como este, que não há!

M-  Bom, muito obrigado pela vossa paciência e disponibilidade em estar aqui connosco, ainda por cima um tema tao difícil como este, como é obvio e pronto, nós agora vamos, a CM vai analisar isto e depois há-de entrar em contacto convosco para verem quais foram as conclusões do conjunto todo de conversas deste tipo, está bem? Muito obrigado!

P11- Sim senhor! Obrigada!

Todos os participantes- Obrigada!

***Focus Group* D**

M- Moderator

CM- Co-moderator

P13- Caregiver, female (daughter)

P14- Caregiver, female (daughter)

M- Bom dia, obrigado por terem vindo, aqui a ideia é recolher informações que não conseguimos recolher nos questionários, está bem? Nós gravamos o áudio para podermos depois ouvir e analisar os conteúdos e assim podemos estar mais atentos à conversa, a (nome da anotadora) é que vai ser responsável por tirar aqui uma série de notas que depois nos ajudam e aqui a ideia é vocês darem-nos um bocadinho a vossa experiencia em lidar com os familiares com demência, queremos saber um pouquinho o vosso contexto diário que neste caso vai ser diferente, nas duas, a P13 trabalha e tudo mais! Mas são as duas filhas, estamos sempre aqui a falar das mães e, portanto, não há regras nenhumas, nós temos alguns tópicos que vamos aqui tentar abordar, mas a ideia é a conversa fluir e partilharmos ideias entre todos... Se calhar começaríamos por nos apresentar, não é? Apesar de já termos conversado um bocadinho, dizer o nome, a situação do doente, a idade também seria importante e o contexto, se esta a trabalhar, neste caso, a P13, como é que é esse trabalho, como e que faz a gestão das coisas...

P13- É um bocado difícil [risos]…. É um bocado difícil gerir as coisas que neste momento... Eu chamo-me (nome do participante), tenho 40 anos, a minha mãe chama-se (nome do doente), tem 80 anos, já esta com demência há mais ou menos 4 ou 5 anos... Estou com ela sozinha, os primeiros sinais, quem me alertou foi a minha madrinha, e que disse que era melhor procurar o médico de família, mas ela não disse diretamente o que é que era, só disse que era alguma coisa grave e para eu procurar o meu médico de família, que tive sorte, foi uma excelente pessoa, ajudou-me, mandou-me fazer logo exames à cabeça A minha mãe e isso, no primeiro exame, não acusou bem, bem o que é que era... Só depois, ele quando mandou aqui para o hospital e a médica que acompanha a minha mãe, é que, quando mandou fazer um exame mais detalhado, a sim, é que foi acusado mesmo demência... Nessa altura foi um choque para mim...

M- Pois...

P13- E então, eu logo no início, não me explicaram bem o que é que era Alzheimer... Eu fui à internet por curiosidade e cada coisa que eu lia, só me apetecia era mandar o telemóvel, porque eu estava a ver através do telemóvel, pelos ares... Porque era cada história e cada testemunho que uma pessoa ficava: “Ok, a minha mãe vai-me esquecer?” ... É... Foi logo uma das coisas que eu fiquei com medo, é que a minha mãe olhasse para mim e não soubesse quem eu era...

M- Deixasse de a conhecer...

P13- Felizmente, por enquanto ainda não, mas há coisas que ela já esquece, por exemplo, ela não sabe a data do meu nascimento, nem o dela, quando chega o dia de aniversários de familiares próximos, ela já não se lembra... Às vezes, pequenas coisas, não sabe a data do dia em que está nem a semana, e às vezes, ela arruma esta caneta aqui e se for preciso, já não se lembra que arrumou a caneta aqui, e então assim ao início para mim foi assim um bocadinho, um “BACK”! “Então o que é que eu faço agora, só estou eu e a minha mãe sozinha, tenho que ajudá-la de alguma forma!”. Então, eu preferi encarar a doença como “uma brincadeira”, digamos assim, brincar com ela... Então, nisso vou ajudando a minha mãe, olha, ajudando com as horas, com o dia, com as datas de aniversário, para ela tipo, também não se sentir muito, porque eu acho que ela deu conta que ela está doente, mas ela não aceita... Tanto que ela não gosta de ouvir falar, fui procurar vários sítios para a colocar, ela nunca aceitou...

M- Sítios de que gênero? Centros de dia?

P13- Centros de dia, porque sabia que ela não...

M- Para ela não estar sozinha? Enquanto trabalha?

P13- Para ela não estar sozinha.... Exato... Porque eu tinha sempre medo, ou que ela saísse de casa e se perdesse, porque na altura ela estava a trabalhar e então, principalmente, quando é a altura de inverno, ela também já não tem, tem pouca visão, ela perdia-se muito, apanha muitos sustos, comprei-lhe um telemóvel, para lhe ajudar a orientar ou caso ela se perdesse ela conseguisse ligar para eu também saber onde e que ela estava. Então ao início, digamos que foi assim um bocado difícil, porque eu estava a trabalhar, ainda por cima trabalhava à noite, o meu médico de família é que me ajudou para eu pedir um horário para de manhã, no trabalho facilitaram, então neste momento eu trabalho de manhã para à noite poder ficar com ela... Porque foi o que eu pensei, durante o dia é mais fácil, ter mais pessoas, consegue ver melhor, à noite se ela saísse de casa e se perdesse ela muito mais complicado... E também tenho por um lado até, digamos que posso dizer que sou premiada até, porque tenho muitos colegas e amigos que me ajudam, vão orientando, ajudando, porque há dias em que estou muito em baixo e às vezes só me apetece abrir um buraco e ficar lá e não voltar, porque a situação está-se a tornar cada dia mais difícil... Com o evoluir da doença, ao início, digamos que as coisas estavam mais fáceis, agora neste momento não, tive que arranjar mesmo uma pessoa para ficar lá, porque como eu disse eu tentei por ela num centro de dia, ela virou-se para mim, ainda levei-a em dois centros de dia e ela disse-nos que estava melhor na casa dela do que lá e lá as respostas que eu recebi é: "Não posso obrigar os doentes a virem, as pessoas tem de vir de livre e espontânea vontade!”. Ok, se as pessoas não podem obrigar, então o que é que nós os cuidadores ou os filhos fazem, que trabalham, têm despesas, têm coisas para pagar, como é que a gente faz para as nossas despesas e não só, para as despesas do doente, porque infelizmente os remédios são caros... Como é que nós fazemos isso, ou como é que nós gerimos isso?

M- E neste momento teve de pôr alguém lá em casa?

P13- Neste momento, tive de pôr alguém lá em casa, ela não aceita muito, mas...

M- Mas é uma empregada? Uma pessoa contratada? Ou é uma amiga?

P13- É uma amiga, neste caso, porque ela já conhece desde criança, nós brincámos na rua e isso, então ela fica com a minha mãe, não fica lá o tempo inteiro porque a minha mãe não aceita, ela tipo vai e vem, vê se ela já tomou o pequeno-almoço, já almoçou, fica lá algumas horas com ela até dar, digamos, o lanche, e depois vai-se embora também, porque ela tem dois trabalhos... E então assim digamos que eu fico um bocado mais descansada, não fico com tanto receio de ela sair à rua, porque a desculpa que ela arranjava para sair à rua era os iogurtes, ela bebia os iogurtes e então para ela não saber o que é que ela comia, ela vinha despejar os iogurtes cá fora no caixote do lixo, só que nessas duas, nessas várias idas e vindas que ela fez, ela por duas vezes caiu e quem me alertou foram as pessoas, que nós temos uma escola em frente à casa, é que nos, me alertou, chamou a atenção: “Olhe a sua mãe, neste tal dia caiu e bateu com a cabeça”... Porque ela...

M- Ela não dizia?

P13- O primeiro, ela disse, mas o segundo já não... E uma pessoa fica sempre com receio porque bater com a cabeça é sempre perigoso.... Ok, ela hoje bate com a cabeça, amanhã vai um braço ou uma perna e depois? Porque depois as outras pessoas quando vêm, não querem saber se a pessoa trabalha ou tem coisas para pagar, é do tipo, o culpado és tu, tu é que devias de estar aqui e és tu a responsável pela “X” pessoa...

CM- As outras pessoas quem? Refere-se a quem? Quem é que acusa?

P13- Neste caso, a polícia, se chamarem a polícia, não é? A polícia não vai querer saber se eu tenho despesa para pagar ou se tenho outras contas ou isso, é eu sou filha, como filha tenho obrigação de cuidar da minha mãe e então eles não vão querer saber disso e então a primeira coisa que fazem é, “A senhora vai presa, como não estava aqui presente para tomar conta da sua mãe, a sua mãe caiu estava à sua responsabilidade, a senhora é que acaba por arcar com as consequências.” Não é? E neste caso, depois a minha mãe é obrigatoriamente internada em alguma clínica ou assim porque dizem: “Ok, esta senhora não está apta para tomar...”

M- Não está responsável...

P13- Exato, “...conta da mãe”

CM- E no seu caso, em que é que se revê, aqui destas coisas todas?

P14- Agora estava a pensar na questão da responsabilidade, estava a ouvir...

M- Aqui também a sua situação, é a sua mãe, não é? Recordando, é um pouquito, tem 89 anos, não é?

P14- A minha mãe, agora, neste momento já tem 90...

M- Já tem 90...

P14- Já tem esta doença há aproximadamente 10 anos.... Está a ser seguida aqui no Hospital (nome do hospital) na consulta de Neurologia do Professor I... Pronto, ela teve várias fases da doença, não é? No início começamos a ... Eu ainda estava a trabalhar, neste momento já estou reformada...

CM- Que idade é que tem, desculpe?

P14- Tenho quase 71, praticamente.... Reformei-me há cinco anos e durante o período em que estive a trabalhar foi um bocadinho complicado porque ela já tinha alguns distúrbios e além de ter Alzheimer ela tem, é diabética, faz insulina e eu já tinha muitas preocupações com a questão dos horários da insulina e...

M- E nessa fase vivia só com a sua mãe?

P14- Nessa fase, a minha mãe vivia em (localização) e eu vivia em (localização), eu estava a trabalhar, de maneira que eu ia lá aos fins de semana, ia com ela às compras, pronto ela ainda andava bem, ia com elas às compras ao supermercado, andava ali uma hora, via tudo, ela é que escolhia porque ela sempre gostou muito de cozinhar e fazer a comida dela e era capaz de fazer comida, pratos elaborados, mesmo só para ela... E era um bocadinho esquisita porque só gostava da comida feita por ela... E então, eu ia lá no fim de semana, deixava-lhe tudo no congelador, os bifes, tudo separado, a fruta e quando ia lá, a certa altura tinha de ir já a meio da semana também, ao fim do dia ia lá e às vezes ela já tinha tirado tudo do congelador, já tinha, a fruta já tinha comido... Pronto, e estava a situação um bocadinho complicada, estava sempre a telefonar, e ela às vezes adormecia à tarde e depois já não tinha a noção se era de dia, se era de noite e a questão da insulina é muito complicada. De maneira que eu vivi ali assim um período um bocado... Porque ela vivia sozinha também... E pronto, eu reformei-me na empresa, embora as pessoas nunca ficassem até à idade da reforma, saíssem sempre um bocadinho antes, quando houve oportunidade e sabendo que tinha o problema da minha mãe eu saí 6 meses mais cedo. Ela saiu para minha casa e esteve ali comigo 3 anos, mas eu vivo sozinha e vivo num sexto andar, de maneira que era complicado...

P13- Tinha elevador pelo menos?

P14- Tem elevador, o complicado é em termos de janelas, varandas e ....

P13- Sim...

P14- Nunca ficamos e podia vir à rua às compras, não é? E deixá-la sozinha era complicado... Às tantas já não sabia se devia deixar a porta fechada à chave se deixar a porta...

P13- Aberta.... Porque neste caso eu...

P14- Temos sempre medo que ela saía, não é?

P13- Exato!

P14- Mas depois sentia-me mal, pensei assim: “Então, eu saio, acontece alguma coisa e ela não consegue sair?”. E era sempre aquela...

P13- Uma aflição!...

P14- Aquela dúvida e depois eu tentei fui, ela foi para um centro de dia...

P13- E ela aceitou?

P14- Ela aceitou. Eu ia levá-la porque não havia, o centro de dia até era bom, tinha assistência, tinham assim uns, estimulação cognitiva, tinham uma ginástica, pronto, e eu comecei por levá-la 3 dias por semana... Eles tinham uma carrinha que aquilo era em (localização), mas a carrinha não abrangia a minha zona, de maneira que eu ia de manhã lá pô-la e depois vinha buscá-la. Porque o médico disse que também convinha que ela criasse rotinas e como tinha aquela ginástica e estava ocupada, acho que para ela era bom, porque ela teve um período um bocado agressivo, era muito agressiva comigo.... Pronto, é a pessoa que está mais próxima e eu acho que ela...

P13- Eu acho que eles acabam por descarregar em cima de nós as ...

P14- Pois.... É isso...

P13- Não digo as frustrações, ou se calhar as “frustrações”, só que eles não dão conta daquilo que fazem... Ou seja, eles agridem, naquele momento eles agridem a si, mas passado 5 minutos, se for preciso vai perguntar, não se lembram...

CM- Já acontece isso com a sua mãe?

P13- Já!

P14- Pois! A minha agora, pronto, essa fase passou, o médico depois aconselhou a que eu a levasse todos os dias para criar rotina, porque ela de manhã perguntava-me: “Hoje é dia de eu ir?”, “Não mãe, hoje não é.” ... Depois já ficava um bocadinho mais, que ela nunca ia muito cedo, não é? E também eu ia buscá-la cedo, era mais para ela ter aquela ocupação ali...

M- Uma rotina...não é?

P14- E elas jogavam, jogavam bowling e o animador até me dizia: “Aí a sua mãe a fazer contas de cabeça é um espetáculo!". Porque a minha mãe, ela a minha mãe tinha tido um negócio, tinha uma papelaria em frente ao liceu, e sempre teve uma vida assim muito ativa, o meu pai morreu cedo e às tantas ela ficou sozinha a gerir aquilo e depois era aquela, aquele período dos intervalos das aulas em que os alunos vinham todos ali e ela despachava aquilo tudo assim, mas ultimamente já estava com receio porque eles depois já podia não ter assim um comportamento assim muito bom e ela se calhar já não dava por isso! E ela habituou-se muito a contar o dinheiro, até quando foi a mudança para o euro ela mais ou menos percebeu e ela lá no centro de dia o animador dizia assim da minha mãe, porque eles jogavam bowling e acho que tinham de contar os pontos, cada um tinha de contar os pontos, então a minha mãe contava os dela e contava os dos outros, antes de eles responderem já ela estava a fazer as contas de cabeça e a dar a resposta! E pronto, passou essa fase, ela começou a ir todos os dias e, entretanto, pronto, eu já tinha, já estava muito cansada, ela começou a ficar também debilitada das pernas e doíam-lhe um bocadinho... Eu, às vezes, não tinha lugar para estacionar quando chegava ali a casa, aquilo é um sítio difícil e já tinha que, às vezes, ficar meia hora à espera que ela... A ver se arranjava lugar para estacionar, tinha medo de vir com ela de mais longe, que ela me caísse, a atravessar a estrada ainda caiamos as duas... Andei ali, inscrevi-a em alguns centros de... lares, porque eu também já tinha umas noites muito difíceis, era eu sozinha, pronto, ao fim de semana a minha filha sempre dava uma ajuda, mas eu dava-lhe banho, eu dava-lhe... Tratava dela, fazia-lhe tudo...

M- Estava muito dependente já, nessa fase?

P14- Já estava, já estava...Já tinha piorado, ela já não se lavava sozinha, de noite, duas e três vezes ela ia à casa de banho e eu, dormíamos no mesmo quarto, duas camas, mas eu já não conseguia, como quando temos um filho e estamos sempre alerta, ela mexe-se na cama e eu sempre com medo, acordava, pronto, ia com ela à casa de banho, ainda conseguia com cuidado, nunca a deixava ir sozinha e ela ia para a cama, depois eu tentava adormecer, pronto, mas às vezes, já não conseguia, de maneira que o meu sono ficou assim um bocado e ainda hoje não estou, não durmo bem. E anda exausta já... E depois ela teve 3 meses na (localização), para alívio do cuidador...

M- O descanso do cuidador...

P14- Teve lá 3 meses, pronto, eu ia lá diariamente, lanchar com ela...

CM- Só... conhece isto?

P13- Conheço, já ouvi falar, mas a... Nunca lhe opus, não... Como não, a mesma coisa, como não consigo levá-la para o centro de dia, que ela não aceita...

P14- Pois...

P13- Se lhe vou dizer que a vou levar para esse sítio, então aí é que nem pensar! Ainda tentei que a minha irmã levasse ela para (localização), fora de questão!

CM- Porquê (localização)?

P13- Porque é onde a minha irmã mora neste momento, pedimos também para me dar um bocado de descanso, mas ela disse que não...

M- Só tem essa irmã? São as duas...

P13- Só...

M- Não pode recorrer a mais ninguém neste caso, não é?

P13- Tenho a minha madrinha que mora lá ao pé, mas também a mãe doente, também num centro... E o resto dos familiares, não! Estão longe!

CM- E a sua mãe deu-se bem lá na (localização)?

P14- Deu-se! É muito bom, tem enfermagem permanente e como a minha mãe tem o problema dos diabetes, eu ali nesse aspeto estava muito descansada... Neste momento não estou! Os enfermeiros eram impecáveis e eu pronto... E eu também estava com receio, era a primeira vez que ela lá ia ficar.... Aquilo custou-me um bocado, deixá-la ali na... Mas todos os dias ia lá e pedia para lá lanchar com ela e eu gostei imenso, acho que é muito bom!

CM- A (localização) ainda é longe, não é? A (localização) é onde?

P14- É (localização)!

CM- Em (localização) e ia lá todos os dias de onde?

P14- Eu moro em (localização) que é relativamente perto...

CM- Aí é perto de lá?

P14- É, é perto... Agora neste momento a minha mãe está num lar da (nome da instituição) na (localização). Eu vou lá quase todos os dias, em sete dias vou lá cinco e é quando não vou todos os dias.

CM- Isso já é mais longe, não é?

P14- É, ir e vir da minha casa 40 quilómetros.

CM- Vai de carro ou de transporte público? De carro?

P14- Ou transporte público, eu a maior parte das vezes vou de carro, agora por acaso tirei o passe e comecei a experimentar a ir porque depois tenho, estou mais limitada porque gosto de fazer ali o acompanhamento da hora do jantar, isto do jantar, e a questão como eles não têm enfermagem todo o dia, têm enfermagem só de manhã, mas não interferem na questão das unidades da insulina, por aquilo, tem de se medir e ver quanto é que se dá, aquilo não é sempre igual. Agora à noite já diferente, o médico, ela está na consulta da nefro(logia) no Hospital (nome do hospital) porque os diabetes têm várias implicações e tem a nível renal, está a ser um problema e eu vou lá porque antes do jantar tenho essa possibilidade de estar ali, de ver, pronto, medimos a glicemia, acompanhar e até na cozinha perguntam-me sempre o que é que ela pode comer, pronto, há uma ou outra empregada que também sabe fazer isso, mas há outras, mas nunca estou descansada, ao lanche digo sempre, olhe que ela não pode comer açúcar, deem-lhe só metade do pão, não lhe deem porque a minha mãe come bem... Porque esta doença, elas perdem um bocado a noção da quantidade de comida que ingere...

P13- Exato, sim...

M- Também nota isto?

P14- Nota isto?

P13- A minha ganhou aversão à comida, ou seja, eu durante o dia, eu deixo as coisas já preparadas para a rapariga que fica lá com ela, que vai lá... Mas nós notamos que ela ganhou aversão à comida, ou seja, ela prefere comer pão, iogurte, leite, do que comer mesmo comida de prato... à noite...

M- Acha que isso seja porque ela tem mais facilidade em lidar com esses alimentos do que com a comida de prato?

P13- Sim...

M- Porque a comida de prato tinha, se calhar, de deixar cortada e ela comia de colher...?

P13- Hum... não...

M- Será para esconder aí alguma dificuldade dela, não?

P13- Hum... Penso que não, porque ela à noite, por exemplo, ela come comigo e ela come bem, só que eu acho que ela ganhou mesmo aversão à comida, porque havia coisas que ela gostava de comer e hoje em dia ela torce muito o nariz...

CM- Como é que ela está com o peso?

P13- Ela diminuiu de peso, diminuiu de peso, está muito mais magra, noto muito pela roupa e mesmo pelo corpo dela quando ela fica nua e às vezes quando ela está a comer faz assim uma cara, digamos, não muito boa... E às vezes, já nem metade do prato, já não lhe ponho muito, e às vezes nem metade daquela comida, muitas vezes, ela come. Ela diz: “Aí filha já não me apetece mais”, come só a peça de fruta e pronto, fica por ali...

M- Aqui é ao contrário, a sua mãe come bem...

P14- A minha mãe come bem e comidas de iogurte e isso ela não... Comidas passadas não.... É comidinha mesmo porque ela estava habituada a comer bem, e a comida feita por ela e confecionada... E ela come... E é assim, nós tivemos, por exemplo, quando ela vai a casa, agora já vai menos vezes, porque já está mais, tem mais problemas em mobilidade, e ela vê uma mesa cheia, e ela fica... Quer comer, e às vezes temos de lhe tirar a comida da frente porque ela coitada, não pode comer, nem deve comer em excesso e também não pode por causa dos diabetes... Mas é uma pessoa que come bem porque até lá as empregadas dizem: “Dá gosto ver a sua mãe comer...". E por exemplo, ela descasca a maça, ela descasca, e nós deixamos até porque o Professor I aqui disse, deixem descascar, mesmo descascar os legumes porque lhe faz bem, e ela descasca a maçã, parte e come.

M- Esta situação do lar da (localização) é há quanto tempo? Foi a seguir à (localização), logo diretamente?

P14- Não foi logo a seguir, foi, portanto, ela tinha estado no centro de dia, entretanto foi, esteve na (localização), porque aquilo depois é preciso haver vaga e ficamos à espera de autorização ...

M- E daí foi para onde?

P14- E depois continuou, saiu da (localização), continuou no centro de dia... Depois veio uma vaga, apareceu uma vaga para ali, e eu naquela altura estava exausta, embora não pensasse bem, custava-me pô-la no lar, mas como andava tão cansada, pensei, ela vai e depois eu logo vejo como é que é... Pronto, mas tem continuado e, entretanto, ela lá e com medicação foi acalmando, e acho que estas rotinas lhe fizeram bem, ela deixou de ser agressiva, agora está muito mais calma... É assim um frenesim, se a aborrecerem, é capaz de partir e é capaz de, sei lá, saltar da cama e fazer assim, arranja força não sei onde, porque, entretanto, partiu o colo do fémur e, às vezes, era complicado porque tinham que por grades na cama e ela aquilo não aceitou, não aceitava muito bem... Mas está uma pessoa mais calma, eu vou lá, ela já não me conhece como filha, não me reconhece, “Ó mãe, então?”, eu trato-a sempre por mãe e ela, mas ela não diz nada, e às vezes dizemos: “Então quem é esta senhora?”, “É a minha irmã”, outras vezes sou prima, ela reconhece, “Aí é minha filha!”, ela reconhece, mas não sabe que é a neta, ela até eu acho que ela está um bocado naquela fase da adolescência, a memória dela, regrediu, não é? E ela diz: “Não, não é minha filha, eu nunca casei” ... E depois dizem assim: “Ah, mas há pessoas que não casaram e têm filhos” e ela diz: “Ah, mas eu não sou dessas!” [risos de todos]. E ela depois têm assim um espírito de humor que as pessoas depois...

M- Acham piada, pois...

P14- Acham piada, pronto e eu vou, estou lá com ela e ela lê, pronto que eu ponho revistas para ela ler, pronto, faço assim alguns exercícios com ela...

M- Claro...

P13- Para estar entretida...

P14- Faço-lhe massagens, faço-lhe assim aquelas coisas, e ela ainda consegue ler aquelas letras grandes, embora veja mal, mas ainda consegue ler, por exemplo, aniversários e isso ela não se lembra, há pouco tempo ainda se lembrava que fazia anos no dia sete de outubro, mas é agora já é muito raro, e depois isto tem dias, há dias em que ela está assim, parece muito bem, há dias eu fui lá e estava um bocado constipada, nem queria lá ir, porque há dias que eu estou ali duas horas com ela e ela está de cabeça baixa e eu “Mãe...”, e eu a tentar falar com ela e mexo-lhe nas mãos, e ela não reage, está sempre, muitas vezes com os olhos fechados... Esse dia eu nem estava assim com vontade, cheguei lá, ela estava com uma boa disposição e eu disse assim: “Olha só isto valeu a pena, só para a ver assim, valeu a pena cá vir!” ... E bem-disposta, a falar, mas pronto, há aquela fase que eu acho que do casamento para a frente apagou-se!...

M- Isto também aconteceu com a sua mãe? Sente que às vezes ela pensa que está noutra fase da vida dela?

P13- Sim, às vezes, ela fala muito a respeito de (localização), que era a terra dela, fala muito a respeito do passado, do presente não muito... Não muito... E também já noto que, como a minha irmã mora fora, às vezes quando a minha irmã vem, ela não lhe reconhece, tanto que a minha irmã, foi lá deixar qualquer coisa em casa, e ela disse-me: “Ah, tive cá uma senhora que foi deixar ali uma coisa no teu quarto”, e eu: “Uma senhora?”, tentar saber quem era a pessoa, só depois é que disse, Ok, é a minha irmã e ela tratou por senhora, ok, ela já não se lembra que é filha dela...

M- Aqui quando a P14 falou da chave de casa, havia aí qualquer coisa...

P13- Sim, neste momento, nós tivemos que tirar as chaves de casa, devido a estas quedas que ela tem dado, porque ela vai de chinela para a rua, nós tivemos que lhe tirar as chaves de casa e tem sido um problema para gerir, porque ela pergunta sempre pelas chaves, porque ela diz que se sente encurralada, como se tivessem enfiado a tranca dentro de casa, às vezes, ela diz coisas que me faz sentir mal, só que às vezes eu penso, se lhe vou dar as chaves e acontece alguma coisa grave, será pior isso? Ou ter de lhe tirar as chaves agora, não é? Porque eu penso, Ok, eu quero chegar a casa e encontrar ela bem e não tipo, estar no meu trabalho e receber um telefonema, “Olha, vem a correr, vem ao hospital, porque a tua mãe caiu, ou porque a tua mãe partiu ou a cabeça, perna, braço, qualquer coisa!”

M- E está a ser fácil, diariamente ela volta muito a esse assunto?

P13- Muito, constantemente, pode não ser logo quando chego, mas passado assim algum tempo: “Então filha, as minhas chaves, quando é que trazes?”, e às vezes, tenho de andar sempre a arranjar desculpas e desculpas... Ainda agora quando saí de casa: “Então (nome do participante), as minhas chaves?” e eu disse: “Olha, como as chaves têm um código, vai demorar um bocado para vir...”. Tenho que tentar arranjar sempre alguma desculpa para lhe dar de justificação, para justificar a falta da chave dela...

M- Em termos de tempo, quanto tempo é que acha que dedica, como é que o dia a dia normal, é trabalho, casa, mãe, basicamente, ou consegue ter algumas atividades sociais, amigos?

P13- Não, eu já não estou com os meus amigos há algum tempo... Há muito tempo.... Isolei-me, sim, eles dizem mesmo que eu isolei-me... Praticamente...

M- Mas até disse que eles eram compreensivos na sua situação...

P13- Exatamente, eles sabem disso, e eles sabem porque é que eu não saio, porque eles convidam muitas vezes e eles sabem disso, mas sim, eu sinto-me que isolei muito, porque eu dantes, eu era capaz de sair à noite com eles, ou ir à discoteca, ou só ir beber café e de uns anos para cá, nada disso...

P14- Nesse aspeto, a nossa vida modifica-se muito, eu saí do trabalho e enfiei-me em casa, naquela altura, em que a gente pensa que vamos reformar-nos e que vamos ter tempo para fazer tudo e não sei que mais, é para esquecer, portanto, dediquei-me, deixei de estar com os meus amigas, não podia sair à noite...

P13- Sim, e tive que abdicar de muitas coisas, eu tipo saía com os amigos, não é? Ou ia beber café ou ia à discoteca e ainda ia para o ginásio e até isso eu tive de abdicar, porque todo tempo que digamos que eu depois disponho eu dedico a ela...

P14- Pois é... É para ela.... Pois é isso...

P13- É para ela, ou ir às compras, cada vez, se vou às compras, se vou ver qualquer coisa ao cinema, ou se vou dar um passeio, eu levo ela. Porque eu penso, “Ok, ela está durante esta semana toda em casa, enquanto eu estou a trabalhar, nos dias em que eu estou de folga, às vezes, ok, eu fico em casa porque às vezes também não me apetece estar a sair, ou estou tão cansada...”

P14- Pois é!...

P13-... Mas quando saio, ok, “Mãe vamos embora, vamos à rua, vamos passear, vamos fazer qualquer coisa” para ela não estar sempre enfiada em casa porque isso também é um bocado mau, não é? Ela já passa quase 5 dias enfiada em casa, aqueles dois dias em que eu estou em casa porque não, levá-la para algum sítio? Não é?

P14- Pois é isso!... Eu também fazia isso com a minha, também a levava à rua para andar um bocadinho, embora seja um sítio mais movimentado, mas também fazia isso, mas realmente a nossa vida muda muito...

P13- Muda, muda...

P14- E depois é o cansaço, porque a minha mãe, mesmo quando ela estava no centro de dia, eu ia buscá-la, ia levá-la, tinha que a ajudar, ela com aquela tremura, às vezes, nas pernas, chegava ao elevador e ela, às vezes, como estava mais escuro dentro do elevador, ela notava a diferença, e as pernas, acho que é uma questão nervosa, começava a tremer...

P13- A tremer, sim...

P14- E eu tinha de pôr as minhas mãos ali, tinha que a apoiar com medo que ela caísse e, e era complicado, e pronto, houve assim, ela saía, eu saía com ela também uns bocadinhos, mas às tantas, já estava um bocado limitada porque sozinha tinha também algum receio...

CM- A P13 há pouco falou em nós, quem é que vive lá em casa para além da P13 e da mãe…

P13- Neste momento, só sou eu e a, só sou eu e a mãe...

M- Hum, ok... Portanto, de facto, o tempo acaba por o tempo livre acaba por ter que estar com ela porque é a única cuidadora, é isso?

P13- Exatamente...

CM- Ok...

P14- Até porque em termos de apoios, pronto, eu inscrevi a minha mãe, perguntei até no lar, porque ela foi para o lar como particular, a minha mãe não tinha, não tem bens, não é? Tinha algum dinheiro, pouco, que, entretanto, acabou praticamente, ela vive com a minha reforma e eu com a dela...

P13- Exatamente, lá está, eu também é a minha questão, e o mais curioso disso tudo e que eu acho e digamos que revoltei-me um bocado, foi quando eu estava a procura, e a procurar ajuda para me ajudarem a pagar, a um cuidador, a pessoa para mim disse que primeiro eu tinha que gastar o dinheiro dela, os depósitos, tudo o que ela tinha e só depois é que eles entravam com alguma contribuição, e perguntei mesmo a ela, “Então quando eu acabar aquele dinheiro, também não sei se a resposta vai ser sim ou não, se a resposta for não, como é que eu fico?!”.

P14- É, é complicado...

P13- Como é que eu consigo ter um cuidador lá em casa, se os cuidadores são à volta dos 750€ para cima.... Onde é que eu vou buscar esse dinheiro se não tenho?

P14- É muito caro, é muito caro! E é difícil de arranjar! É muito difícil arranjar!....

P13- Exato! Sim e, eu andei, eu cheguei a uma fase em que eu, olhava e dizia, “Eu vou ficar maluca”, só de andar nesta fase de procurar! Eu tive de dar um descanso e dizer: “Não! Chega!”, agora ficas encostada aí a um canto e depois mais tarde procuras, porque eu me sentia cansada, porque cada porta que eu ia bater, “Neste momento não pode, não há vagas, mas olhe, quando chegar, nesta determinada fase, a gente não aceita!”, então e depois como é que a gente fica?

M- Nesta determinada fase, quê? Em relação à sua mãe? A sua mãe estar numa fase mais avançada?

P13- Exatamente... Numa fase mais avançada da doença...

P14- Numa fase mais avançada da doença...

M- E aí fecham a porta?

P13- Exatamente! Já não aceitam... “Já não aceitamos aqui...”, e eu: “Ok, então e depois nessa fase como é que eu faço?”

M- Hum hum...

P13- Vou deixar de trabalhar, deixo de receber, as dívidas ficam a acumular e eu e a minha mãe vamos para a rua?

M- Essa é outra questão que nos interessa particularmente, é a questão dos custos e a questão de resposta ou falta de resposta, é uma questão importante destas nossas sessões e tem sido aqui muito debatida e há custos com medicação, que custos é que identificam? Medicação, não é?...

P13- Sim, a medicação, e isso mesmo assim ao falar com os meus amigos e colegas lá no trabalho é que ainda fui conseguindo arranjar medicamentos mais baratos, porque o medicamento, digamos, original em si está à volta dos 70, 80...

P14- Não tem o... Não anda na consulta de neurologia?

P13- Ando... ando...

P14- Mas há medicamentos que têm o despacho e que são muito mais, e há uns que é quase a custo zero...

P13- [risos], eu perguntei à médica, nada!... Ela até, às vezes, põe lá na folhinha quanto é que é e quando eu vou à farmácia, são superiores aquele valor que está ali...E as vezes eu fico a pensar...

CM- Quando é que gasta por mês em medicamentos?

P13- Eu agora consigo, eu agora consegui encontrar remédios mais baratos, que ao falar com as minhas colegas, elas foram-me ajudando, mas ao início eu cheguei a pagar 50, 60, 70 pelos remédios...

P14- Mas havia um medicamento que era à volta desse preço que era a memantina, não sei se ela toma isso...

P13- Sim, agora ela toma...

P14- Mas consegue a custo zero... Ou uns cêntimos...

P13- Não! Não, eu pago à volta de 9, 8 euros...

P14- Da memantina?

P13- Sim! Porque o, porque...

P14- Mas se tiver a receita, esse medicamento tem despacho!... Aparece mesmo na receita, despacho.... É a memantina e é outro...

P13- Mas eu vou com a...

M- Quem é que lhe passa os medicamentos da mãe, é o médico de família?

P13- Não, não, não.... É a médica aqui mesmo do hospital...

P14- Mas isso é na consulta de neurologia...

P13- Neurologia, sim!

P14- E não aparece na receita o despacho?

P13- Não!

P14- Ah! Mas devia, a memantina.... Pronto há a rivastatina, esse não tem...

P13- Eu agora ando à volta dos 13 euros, e é genérico...

P14- Sim, genérico, e depois também convém, porque eu também normalmente, ia ali ao site do *Infarmed* ver, agora os medicamentos são comprados, a farmácia fornece ao lar, mas eu digo sempre que quero o medicamento genérico...

P13- Sim eu andei de farmácia em farmácia a ver quais é que eram os mais baratos para conseguir comprar...

M- Portanto, agora no total?...

P14- Mas veja essa questão do despacho, porque isso é importante...

CM- Portanto, tem de estar escrito na receita, é?

P13- Tem que estar, pois lá na receita não aparece...

P14- Eu acho que diz na receita...

CM- Portanto, tem de pedir à médica para por lá o despacho...

P14- Tem de pedir...

M- Atualmente, fica-lhe em quanto, a farmácia toda da mãe?

P13- Hum.... Então, só dela, às vezes, fica à volta, entre os 30 e os 50, depois depende, porque há, lá está, ela também não tem só Alzheimer, tem outras doenças e depois depende das fases, às vezes eu consigo entre os 30, 40, 50...

M- Outras doenças, estamos a falar de que doenças?

P13- A minha mãe também diabetes...

M- Diabetes...

P14- Diabetes...

P13- Tem um problema de anemia... E então...

CM- E sem ser a medicação, que outras despesas é que vê aí avultadas?

P13- Oh, por exemplo, quando nós vamos fazer alguns exames, há exames dela... Ainda ontem, fui fazer com ela o exame de multiusos, paguei com ela 12 euros...

M- O atestado multiusos...

P13- Sim, 12 euros...

P14- E é porque já é mais barato, porque eu já paguei 25 e era 50! E passaram um atestado multiusos há 3 anos com validade de 3 anos, agora tive que o renovar, com os problemas que ela tem e a doença que é irreversível, não é? Não faz muito sentido ter validade...

CM- Não faz sentido...

P14 –...termina no fim deste mês, e tive de pedir nova avaliação, não dá, não dá para perceber isto também... E outra coisa, eu quando fui tentar inscrever a minha mãe na segurança social uma das coisas que me disseram foi que eu tinha de tratar da interdição dela... Eu disse: “Mas eu sou filha única, a minha mãe não tem património” ... “Mas tem, a sua mãe não pode dizer que quer ir para um lar, porque pela doença que tem, portanto, tem que ir ao tribunal, ao ministério público”, e eu tive que ir para o ministério público, eu a minha filha, o meu genro, porque sou tutora dela, andámos dois anos naquilo, para nada, porque neste momento eu não tenho apoio nenhum derivado da segurança social... Quando foi para entregar ao fim de dois, eles aceitaram-me tudo, não é? E o requerimento como eu tinha pedido... Ao fim de dois anos quando eu fui lá entregar na segurança social disse: “Olhe o processo já está, já foi a sentença, está aqui, eu venho entregar”, “Ah, isso agora já não, isso já passou 2 anos? Isso já não é preciso!”, eu disse: “Mas como não é preciso? Então fizeram-me ir tratar disto e não é preciso?”, eu sei que por lei tem de ser, nós temos que ter, tratar da interdição, mas eu não conheço ninguém que tenha, a quem tenha sido exigido isso! Eu fiz uma formação na Associação de Alzheimer, na parte jurídica da demência, pronto, foi por uma advogada e por acaso falámos neste assunto, pronto, isto tem-me servido para alguma coisa, porque às vezes pedem-me, de qualquer maneira os familiares são sempre responsáveis, os filhos são sempre responsáveis, mas legalmente, se não tiver a interdição, não são..., mas pronto...

P13- O papel...

P14- Mas se for ao médico, “Olhe o médico diz que precisa de uma anestesia, a senhora tem que assinar...”, eu disse: “Eu tenho que assinar?”, “Tem, como responsável!”, e eu disse “Olhe, ó doutor, mas fazem esta cirurgia sem anestesia?”, “Não, não fazemos...”, “Então porque é que tenho de ser a responsável?”, mas pronto... Isto é o protocolo que existe, não é? Mas em muitas situações tenho levado a interdição porque não posso tratar de assuntos da minha mãe, e então agora tenho, e assuntos que são assuntos dela, de saúde.... Mais nada...

CM- Mas a interdição aqui funciona como uma espécie de procuração, é isso?

P13 e P14- Sim...

P13- Também já me, também a senhora da segurança social que eu depois fui também já me falou sobre isso que eu depois mais tarde, também vou ter de tratar disso...

P14- Mas fui lá eu a uma sessão, a minha filha, a minha filha é pro-tutora, o meu genro é vogal.... Tivemos que lá ir um de cada vez, depois voltamos lá e depois no fim é a sentença, eu, custou-me um bocado a digerir, mas é preciso...

M- Pois...

CM- Qual é a sua área de trabalho, já agora? Ou qual era a sua área de trabalho?

P14- Contabilidade...

CM- Contabilidade, ok ... E a sua área de trabalho?

P13- Eu sou operadora de loja...

CM- Loja, ok, quando fala dos colegas, é dos colegas da loja, é isso?

P13- Sim!

P14- Eu trabalhava na empresa, (nome da empresa), que também fornece aqui o hospital, a nível de oxigénio, instalações e isso... E pronto...

M- E a sua situação em termos de custos? Neste momento, tem a medicação, tem o lar...

P14- Tenho, tenho o lar, tenho as fraldas!...

M- Fraldas...

P14- Que também já foi à segurança social, mas ...àquele departamento que abriu há pouco tempo...

CM- Não tem?

P13- Não, por enquanto não... é só mesmo a medicação, que eu tenho com ela, em termos de despesas...

P14 -... Isso tenho eu de pagar, pago à volta de 60€ das fraldas, mais aquelas cuecas de incontinência que eu compro no supermercado e eu levo, portanto eu pago 850€, pagava 1000€, e, entretanto, pedi no lar, aquilo é da (nome da instituição) ...

P13- Agora, eu só faço uma questão, então e aquelas pessoas que não têm? Ok, há pessoas, existem pessoas que têm possibilidade de pagar, não é? E...

P14- Eu faço um sacrifício muito grande, a minha vida mudou muito!...

P13- Não digo que não, por isso é que eu vou generalizar toda a gente, eu falo, há pessoas que conseguem porque têm bens e isso, ok, digamos que são “ricos”! E aquelas pessoas que não têm, ou aquelas pessoas que não têm rigorosamente nada? Que são pobres? Como é que essas pessoas fazem?

P14- Pois, há as vagas da segurança social, que não há! Não há! Supostamente, no lar, as pessoas são postas por (localização), depois nós nunca temos prioridade, e eu andei a tratar disso tudo para nada... Depois lá apresentei os meus rendimentos, baixaram-me a minha mensalidade, neste momento pago 850 e estou à espera, entretanto surgiu ali, ela estava inscrita ali em (localização), nas (nome da instituição), porque a (localização) também é das (nome da instituição), e eu tenho isso como uma boa referência e eles têm enfermagem 24 horas, neste momento a minha mãe precisa, o que mais precisa é de assistência de enfermagem e pensei, a mudança, mas eu acho que ela a mudança já não vai notar muito, penso eu, não sei, porque há coisas da doença que nós também ainda não conhecemos, não é? Mas a nível de enfermagem, ali (no lar), é complicado e eles ali, têm um protocolo com o Hospital (nome do hospital), e a minha mãe foi lá a uma consulta e estou à espera da autorização do Hospital (nome do hospital), para ela ir para ali, portanto, se eles derem o ok, quando houver vaga, ela entra, e paga-se menos, paga-se 660€ mais 30 do tratamento das roupas....

CM- Portanto, paga isso da sua pensão dela e da sua reforma também, não é?

P14- Sim, a dela não chega, não é?

P13- É isso que eu penso, aquelas pessoas que não têm rigorosamente nada, quando têm essas doenças, onde é que elas vão buscar? Ou quem é que vai pagar isso tudo?...

P14- Pois, não ... Isto é muito complicado, por isso eu ando sempre a ver tudo, a poupar em tudo...

P13- Se nós que temos alguma coisa vamos à procura de respostas, e fecham-nos muitas das vezes, com a porta na cara, então imagino aquelas pessoas que não têm rigorosamente nada, que vão à procura e lhes fecham com a porta na cara, eles vão fazer o quê? Vão para de baixo da ponte?

P14- Pois...

CM- P13, a P13 há pouco, se eu percebi bem, deixou de trabalhar a tempo inteiro também por causa desta situação, não é?

P13- Não, eu vou e faço as mesmas horas, só que eu dantes trabalhava à noite e passei para de dia, eu troquei foi de... o horário...

CM- Ok, o horário...ok

P13- Exato!

CM- Portanto, estava a pensar que tinha havido perdas de dinheiro também por causa disso...

P13- Também houve, também houve uma parte, porque há noite eu recebia uma percentagem por trabalhar à noite...

CM- Não recebe... Portanto, perdeu algum dinheiro...

P13- Sim...

CM- Só para percebermos aqui, porque isto é importante para nós, em termos de percentagem, perdeu o quê? 10%? 20%? 30%?

P13- Devo ter à volta de uns 20, 30%...

CM- Ok...

P14- Até já pus a questão a mim própria de ir arranjar um part-time.

P13- Exato! Mas como, agora se calhar tem possibilidades porque...

P14- Ou como cuidador, ou como pronto...

P13- Agora se calhar tem possibilidade porque a sua mãe, está no coiso, mas agora imagine que a sua mãe estava consigo, como é que fazia isso?

P14- Pois, não, não, não fazia, não...

CM- Mas deixe-me pegar nesta deixa da P13, agora com a mãe em casa, aquela questão de ter mais vida para si, não recuperou um pouco da sua vida, em termos de amizades, em termos de ... sociais...

P14- Recuperei um bocadinho, mas... Inscrevi-me numa universidade sénior, para me obrigar a sair de casa, porque eu não sou muito de ficar em casa, mas depois há aquele cansaço e mesmo quando a minha mãe estava em casa, ela ia para cama eu deitava-a e eu ia para a sala, e então eu comia chocolates, bolachas, era o meu momento “zen”, e eu, aquilo era um escape para mim...

M- Só descansava quando a mãe estava deitada?

P14- Eu engordei 10 quilos em 6 meses e ainda não consegui perdê-los, porque pronto, ela ia para a cama, eu sabia que ia ter a noite, mas ficava ali aquele bocado e para mim...

M- Como é que tem tempo para si? No meio disto tudo?

P13- Às vezes, quando ela, aqueles bocados que ela às vezes está a dormir no sofá, eu leio muito no telemóvel e é onde eu encontro, digamos, o meu escape para me refugiar um bocado, digamos, isolar do mundo, em si...

M- Porque esta sua situação também dura há muitos anos... não é? Estamos a falar de quantos anos?

P13- Sim, cinco anos...

M- Cinco anos...

P14- Foi muito cedo também, não é?

P13- Hum?

P14- Ela começou muito cedo...

P13- Sim! Ela começou muito cedo, ao início, como eu disse, era fácil de gerir, mas do ano passado para cá...

CM- Está mais difícil...

P13- E como fico com a sobrecarga toda, eu já tive um princípio de um AVC também o ano passado, já faz um ano, em que, lá está, eu tive de dizer: “Não, eu tenho de dar um STOP, tenho de parar porque se eu continuar nisto...”

P14- Ficamos piores do que elas

P13- Ou ainda vou primeiro que ela...

P14- Eu, às vezes, tenho esse receio...

P13- Exatamente, eu às vezes, à noite, sozinha com os meus pensamentos, eu ponho-me a pensar: “Se eu vou primeiro que ela, o que é que vai ser da minha mãe?”

P14- Eu penso a mesma coisa!

P13- A minha irmã não está cá, a minha irmã não, [começa a chorar] não liga nenhuma! Quer dizer, ela tem duas filhas, mas neste momento só tem uma, ela só pode contar comigo, se eu me vou embora como é que ela fica? Mas é.… ela vai ser atirada num lar, que é uma coisa que ela não quer, ela ali vai acabar por morrer mais cedo!

CM- Há pouco falou de treino, que fez uma formação lá na (nome da instituição), mais alguma formação, mais alguma coisa especifica sobre saber cuidar e também no seu caso já fez alguma? Fora internet? Fora internet?

P13- Eu aprendi sozinha, não! Eu fui aprendendo sozinha...

P14- Nós aprendemos muito sozinhas...

P13- Exato!

P14- Também na internet, eu também fui a algumas sessões do (nome do evento), já tenho ido, recentemente também houve no dia de Alzheimer, ou no mês de Alzheimer fizeram até foi com a intervenção de um lar, ali em (localização), também houve ali um encontro, e eu também fui lá... Sempre que há assim alguma coisa eu vou porque...

M- Vai acompanhando...

P14- Porque acho que aprendemos...

M- Mas a maior parte das coisas aprenderam sozinhas ou falaram com outras pessoas na mesma situação? Por exemplo, falar com outros cuidadores?

P14- Vamos tentando compreender como é que havemos de gerir, eu cheguei a um ponto, também pensei, assim não vale a pena, estar por exemplo, a contrariá-la, a dizer que não é assim ou que ela não se lembra.... Vou alimentando aquelas conversas...

P13- Exatamente...

M- Vão aprendendo, não é?

P14- Vamos ali...A maneira de elas ficarem mais tranquilas, embora nós estejamos sempre a repetir a mesma coisa, não é? Repetimos!

P13- Se for preciso repetir 50 vezes, 100 vezes, mas foi o que eu pensei, mais vale isso, do que contrariar ou não lhe dizer nada, porque ao fim ao cabo, ela depois exalta-se, grita...

P14- Pois é!...

P13- Somos nós que estamos ali, acabamos nós por pagarmos as, a fatura digamos assim, então mais vale, nem que seja 50 vezes, 100 vezes, mas repetir!

P14- Mas vamos repetindo!

P13- Exatamente!

P14- É o mais fácil, e às tantas eu saio de lá assim com a cabeça já pesada, porque nós estamos, mas não a contrário e ela diz “Ah, eu tenho que ir, fui aqui” ou “veio cá o não sei quantos”, “Ah sim, e então como é que foi?” ... Acabo por alimentar as conversas dela porque, para ela ir falando um bocado...

P13- Por isso que eu digo, por isso que eu disse que prefiro levar o Alzheimer como uma brincadeira do que como uma doença a sério...

P14- Sim...

P13- Porque se eu levar como uma doença, ainda vai ser pior para mim para gerir...

M- É muito difícil de lidar, não é?

P13- Exatamente, ao menos assim, se eu levar como uma brincadeira é muito mais fácil...

CM- No caso da P13, a sua mãe também irrita-se facilmente consigo? Também?

P13- Eu posso-lhe dizer que eu tenho 40 anos e em 40 anos eu só apanhei uma vez da minha mãe... E agora com a doença, já apanhei duas! Uma porque eu tive de me meter no meio, porque ela estava, ela digamos que ela e o meu sobrinho parece que não se dão, ela implicou imenso com o meu sobrinho e então, às vezes o meu sobrinho quase que não pode dizer nada que ela vai para cima dela... Então nesse dia, ele ainda é criança e gozão, gozou com ela, ela levou a mal e então foi para bater... Só que ela ia de uma forma que eu tive que me meter no meio, então acabei eu por levar por tabela, não é? E fora outras situações agora também recentes que também tive que me meter, não dizer nada, mas meter e acabei eu por levar, só que lá está... Isso eu tenho de levar, tipo na desportiva, porque se levar como a sério... Uma pessoa começa a remoer, a remoer e não dorme! Não vive!

M- Era isso que eu lhe ia perguntar, e como é que são as noites? Consegue descansar?

P13- Às vezes sim, outras vezes não! Eu já tive que tomar remédios para conseguir dormir à noite e tive que procurar o meu médico de família para pedir ajuda para ter um acompanhamento psicológico, porque onde eu trabalho também não é fácil, e então, estar a gerir o trabalho e estar a gerir a doença da mãe, chega a uma altura em que eu digo: “Eu estou a ficar maluca!”

P14- É, nós às vezes pensamos que qualquer dia estamos pior que elas!

M- E tem tido acompanhamento psicológico?

P13- Tenho! Tenho feito sessões, faço uma vez por mês...

CM- Uma vez por mês, no centro de saúde ou?

P13- Sim, no centro de saúde...

P14- Pois no centro de saúde, a minha médica de família a certa altura receitou-me um medicamento para dormir e eu não tomei, porque eu de noite tenho de ir com a minha mãe, tinha de ir com a minha mãe à casa de banho... “Ah, tome medicação”, e eu disse: “Olhe Doutora, eu não consigo, eu tomei um para experimentar, mas eu não posso passar as noites a dormir... Porque se não, a minha mãe mexe-se na cama, quer-se levantar e eu não dou por isso!”, “Ah, mas vai ver que um dia vai precisar e vai-me dar razão, porque eu estou muito habituada a lidar com estas doenças e um dia vai precisar...”, mas eu não tomo nada!

CM- E agora ainda não? Agora não tem lá a mãe, podia fazê-lo, não?

P14- Mas não quero, não me quero habituar a isso, pronto, faço também lá na universidade, faço ioga, tento gerir sem medicamentos...

CM- E faz muito bem, hum... E consegue, e tem conseguido dormir e acorda descansada...

P14- Sim, mas acordo. eu sempre de noite, e eu dormia bem... Mas acordo sempre de noite, duas vezes mais ou menos, que era aquilo que me habituei e.… pronto... Mas depois durmo...

M- Estava habituada...

P14- ...Como agora não estou a trabalhar, também não durmo até tarde, mas... Posso-me levantar às 8, ou às 9, não tenho que ir a correr para o trabalho, porque eu às vezes, também trabalhava até muito tarde, pronto, é de uma área financeira, é contabilidade e nós reportávamos sempre à empresa, no estrangeiro, e eu, a minha vida mudou completamente e eu vivia um bocado para o trabalho, e depois venho para casa, e de repente a gente aparece, encontra-se com esta situação, é assim um “BACK”... E depois vamo-nos habituando...

CM- A parte da psicologia, nunca teve apoio?

P14- Nunca fiz...

CM- Não?

P14- Não.... Tenho tentado eu...

P13- Gerir...

P14- Gerir isto, não sei...

CM- Uma vez por mês, quanto tempo, já agora?

P13- Ah, uma hora...

CM- Uma hora... hum hum...ok... Há quanto tempo?

P13- Ajuda... Já desde agosto, já faço desde agosto... Ajuda a gerir um bocado, não digo que, não digo que abafa completamente, mas ajuda, a entender certas coisas, porque às vezes, chega ao fim ao cabo, e perguntava-me o porquê da minha mãe estar assim, será culpa minha? Porque, às vezes, eu chegava-me a sentir culpada... Ou será que eu estou a fazer o suficiente para a ajudar? Ninguém, nunca, me dava respostas...

P14- Mas eu acho que nós, eu não sei bem, não consigo perceber qual é a origem da doença, não é? Se calhar também ainda não se sabe bem, mas eu por exemplo, a minha mãe, no início, ela tinha uma vizinha que era uma pessoa mais nova que ela, e a minha mãe tinha assim um feitiozinho, pronto, era muito boa pessoa, era, mas se a chateavam ela também reagia e então, a certa altura, ela começou a dar-se mal com essa vizinha e começou a ter problemas e depois porque a vizinha lhe deitava coisas para o quintal, aquilo tinha os muros baixos, e depois ela deitava para o quintal da outra e pronto... E a minha mãe depois começou a dizer, já eram os sintomas, e ela disse-me: “Aí, esta noite vieram cá e trocaram-me a televisão!”, e eu disse: “Ó mãe, não trocaram, esta televisão é a tua!”, “Não é, não estejas a defender aquela gente, não os estejas a defender, estás-me a atacar” ela assim a exaltar-se e eu já nem sabia o que é que havia de dizer! Devia-lhe dizer que não, que era a dela, para ela ficar descansada, mas ela levava isso como eu estando a defender as outras pessoas, de maneira que gerou-se ali um clima de...

P13- Conflitos?

P14- ...Discórdia e mau viver, e ela depois, às tantas, já dizia que sentia de baixo da cama, as pessoas ali, que andavam a fazer buracos e ficou... E eu acho que isso contribuiu muito para, para a confusão, para aqueles distúrbios dela...

M- Já era... Ou já era, ou já era o...

P13- Já era o início...

CM- Já era o início...

P14- Pois... não sei, eu foi.... Então aquilo era o inferno ali, de maneira que não sei, às vezes eu penso, porque é que será que isto acontece, não ...

CM- P13 conhecia esta coisa do (nome do evento) e estas coisas?

P13- Sim, quando eu fui procurar o centro mesmo de (nome da instituição), lá falaram-me do (nome do evento) e isso, mas nunca fui, por acaso nunca fui...

P14- Pois, eu já fui, eles têm em vários sítios, eu chegava a ir ali ao (localização) ...

M- Sim, eles vão rodando por vários sítios...

CM- Quantas vezes é que já participou nessas sessões? No seu caso?

P14- Olhe eu não sei, eu já fui algumas, não sei, quatro, cinco que aquilo era uma vez por mês...

CM- Qual é o... Vê alguma utilidade naquilo ou o que é que lhe parece?

P14- Ah...

P13- Aquilo ajuda em alguma coisa? Ou pelo menos a gerir?

P14- Ah.... É assim, e não sei...Ah... Também ponho essa questão e se calhar por isso.... Agora já algum tempo que não vou...

M- O que é que é abordado? São tópicos acerca do doente?

P14- Ou fazem-se jogos, porque pode ir, o doente também pode ir...

P13- Sim, como é obvio, faz sentido que sim...

P14-.... Claro que eu não levei a minha mãe porque ela não estava em fase, não é? De fazer jogos.... É um bocado um desafio para nos fazer também a nós...

M- Ocupados?

P14- Ocupados.... Pronto e conversávamos, às vezes ia lá uma ou outra pessoa falar, pessoas que tinham alguma experiência da doença, ou porque eram familiares de pessoas, mas pessoas assim mais conhecidas assim da comunicação social ou assim... Pronto, era ali um bom ambiente, bebia-se o cafezinho e a pessoa lá conversava e eram postas algumas questões e pronto, podia ajudar, mas pronto...

CM- Mas não gostou especialmente...

P13- Mas respondiam? Respondiam-lhe às questões de, acerca do Alzheimer?

P14- Não nos faz mal! É assim, não nos faz mal, mas responder às questões que nós temos...

P13- Respondiam-lhe às questões de, acerca do Alzheimer?

P14- Sim, o tema era sempre esse, não é? Mas as respostas, ou de atender as nossas necessidades, aí não se consegue nada, não é? É mais aquela questão psicológica, aquela... E ajudar-nos se calhar a descontrair um bocadinho.... Lá, naquele momento, não se pensar tanto...

CM- Nesse sentido, o que é que seria bom em termos de formação, em termos de apoio, em termos de treino, o que acha que se? Quer dizer, nós sentimos aqui um pouco que estas pessoas estão sozinhas, não é? O que é que vos trazia, o que vos fazia jeito? O que é que era útil, mesmo neste tipo, às vezes, de contexto, de encontros e de conversas, nós temos aqui, eu esqueci-me de referir, nós temos várias sessões, não é? E depois no fim, vamos enviar-vos um leque de ideias com, de todas as sessões, para poderem concordar, discordar, dar, dizer eventualmente alguma coisa, algum tópico que se tenham esquecido agora, ainda vamos ter depois essa fase, mas coisas que saíram de outras sessões também é, eventualmente, há quem diga que não há este espaço para o cuidador e também há quem diga que há um espaço, mas depois não são abordados os tópicos de interesse, o que é que seria fundamental? Mais a parte de, onde é que se pode ir buscar apoio da segurança social e qual é o procedimento todo.... Mais a parte de...

P13- Se calhar, se calhar ali (refere-se ao evento) falam muito mais do doente do que da pessoa que está a cuidar dele... Deviam falar dos dois, tanto que aqui, o doente é acompanhado constantemente, mas então e o cuidador, não é?

M- Exatamente, falta uma consulta de apoio ao cuidador, por exemplo, um espaço de apoio ao cuidador?

P13- Exatamente, porque...

P14- Eu penso que também já há, não há? Consulta de apoio ao cuidador?

M- Não tenho a certeza...

P14- Pelo menos já ouvi falar, não se a ideia era fazer...

CM- Mas, penso que a pergunta da M é mais, se vocês tivessem uma varinha mágica, uma coisinha que agora no Natal é apropriado, mais ou menos... Se houvesse aí uma varinha mágica o que é que fazia para facilitar o vosso trabalho, que tipo de espaço, mesmo que haja um espaço para o cuidador, o que é que o espaço devia trazer? Devia de dar?

P13- De como sabermos lidar com o doente em determinadas fases, cada doente... Ou seja, a doença em si, não é igual para todas as pessoas, não é?

P14- E os cuidadores também não são todos iguais, não é?

P13- Exatamente...

P14- Tudo depende da maneira como nós interiorizamos as coisas...

P13- Há pessoas que conseguem lidar bem com a doença e há outras que não! Queríamos uma escola!

P14- Pois eu penso que isso que era...

CM- Uma escola, criar uma escola?

P14- Numa fase inicial da doença, penso que é importante, o cuidador ter conhecimento de como proceder em certas situações!

P13- Exatamente, e tive que aprender sozinha.... Tive que aprender sozinha...

M- Às vezes, há muito conflito que se gera por não saber, não é?

P14- Para dar qualidade de vida ao doente também, não é?

P13- Pois!

P14- E que poderiam ter quando nós sabemos como devemos reagir, nós não sabemos, não é? Tentamos, dentro das nossas possibilidades, gerir as coisas para ela sofra menos e para que nós consigamos também dar mais qualidade de vida e gerir as coisas...

P13- Exato.... Conseguir-lhes acompanhar... porque, às vezes, também chega a determinada altura também não consegue...

P14- Sim, sim! Chega a alturas em que a pessoa fica um bocado transtornada, há momentos desses...

P13- Exatamente!

CM- Hum hum... Por um lado, aprender, não é? E mais, o que é que esse espaço deveria dar?

P14- Não sei, eu acho que podia haver, não há, é evidente, mas sítios onde as pessoas se calhar, pudessem ir, para fazer as tais... Exercícios cognitivos, ajudar mais a parte do paciente!...

CM- Do doente? A pessoa com a doença?

P14- Sim... sim... Porque eu senti que quando a minha mãe estava no centro de dia, e ela fazia aqueles jogos, e eu acho que isso era bom, era uma coisa que lhe fazia bem... Ali tem muito muito menos, ela quase que já...

M- Notou diferença nela?

CM- Estimulação cognitiva...

P14- Já.... Praticamente já não anda, porque é assim, ela passa muito tempo sentada... Eu quando lá vou, às vezes, levanto-a, baixo-a e tento e tento... Mas já não tento que ela ande porque tenho medo de cair com ela, mas também sinto que muitas vezes, em vez de a levarem para a mesa, eu quando lá ia levava-a sempre a andar, dava-lhe a mão, como se tivéssemos a dançar e é a maneira de levá-la assim para a mesa a andar... E neste momento, eu também percebo, as empregadas são poucas, não têm paciência, não têm já... Não têm tempo e é mais fácil levá-la na cadeira de rodas, não é?

P13- Sim, também...

P14- Não é? E elas, às vezes, também acompanham pouco, trabalham noutros sítios e também chegam ali, às vezes, já estão cansadas e não têm paciência...

P13- Exato, já não têm paciência para dar...

P14- Isto é muito complicado...

P13- Exatamente...

M- Esta questão dos centros de dia que têm um pouco de estimulação, quer seja física, quer seja, pronto, neuro-cognitiva, a parte da cognição também tem sido aqui abordada noutras sessões e a reação que nós temos dos familiares é sempre muito positiva... Até que ponto é que a P13, não tirava partido aqui de um centro de dia funcional nesta fase para a sua mãe? Porque tem várias vantagens, não é? Cria rotinas para ela, analisando as vantagens para ela, cria-lhe rotinas...

P13- Pois, mas o meu maior problema é ela...

CM- É mesmo o contornar a situação dela ir, não é?

P13- Porque eu já fui procurar 3 centros, só que todos dizem que não podem obrigá-la a ir...

M- E levou-a consigo, levou-a a conhecer...

P14- Ficou lá com ela assim, se ficasse com ela algum tempo...

P13- Eu levei, nós fomos conhecer um, uma senhora mostrou-nos as instalações todas, fomos passear, fomos ver, vimos lá eles a conviverem, eles até põem a mesa, eles ajudam a fazer o almoço e tudo e no final, nós chegamos na sala da senhora e a minha mãe vira-se para nós e disse: “Eu estou bem na minha casa! Eu gostei muito de ver isto, sim senhora, mas eu estou bem na minha casa, obrigada!” ...

P14- E se disser que o médico, que o médico achou que ela podia estar ali melhor, para fazer tratamento, para fazer tratamento...

P13- Eu inventei tudo e mais... Eu cheguei de inventar tudo e mais alguma coisa e disse que ficava mais tranquila se ela estivesse no centro de dia, do que em casa, porque sabia que, não estaria sozinha, estaria acompanhada, e para além de estar a conviver, não é? Ainda ia dar passeios e conhecer outros sítios, nem assim ela aceitou, ela disse que gostava muito bem na casa dela e ponto final... E depois lá dizem-me, “Nós não podemos obrigar eles a virem para aqui” ... Ok, eles não podem obrigar, eu não lhe posso obrigar, vou-lhe fazer o quê? Encostar à parede e dizer: “Olha vais sim senhora para ali e acabou-se?” ... Não posso!

P14- É difícil, quando levei a minha mãe para a (localização) eu disse, custou.me muito, era a primeira vez que ela ia ficar fora de casa, eu disse: “Olha mãe, tens que ir, porque vamos ali, fazer com os médicos e enfermeiros, fazer o tratamento para a diabetes”, que ela já tem diabetes há muitos anos, “Vamos fazer um tratamento aos diabetes”...

CM- Porque ela aceitava melhor se fosse para a diabetes, do que se fosse para o Alzheimer...

P14- Sim, e pronto...

P13- Sim, que até mesmo para trazer para as consultas aqui no hospital, eu não lhe posso dizer: “Olha mãe, vamos hoje à consulta para o Alzheimer”, ela vai-me dizer na minha cara: “Aí é? Vai tu sozinha, eu não!”

CM- É mais fácil vir para a diabetes também, é isso?

P13- Eu aí tenho que inventar, “Não, olha vamos a uma consulta, que vais fazer uns exames...”. Mesmo ontem, ela foi fazer um exame, eu não lhe podia dizer que era por causa do Alzheimer, porque se ela dissesse, se eu dissesse que era para o Alzheimer, não vinha!

P14- Claro.... Sim, sim, tem que aprender a gerir.... Pois!

P13- Tive que aprender a gerir de outra forma, até mesmo, agora para vestir, ela quase veste sempre a mesma roupa, eu não lhe posso dizer: “Olha mãe, não vais vestir esta roupa”, não porque ela vai-me atirar com a roupa, ela já me chegou a jogar com a roupa na cara. Em vez disso eu tenho que dizer: “Olha mãe, o tempo está frio e isso não é adequado para esse tempo, é melhor vestires outra coisa”, mas tem de ser com calma e a batalhar ali, constantemente... porque se eu disser: “Olha, não vais vestir esta roupa, vais vestir aquela”, se eu lhe impor: “Aí é? Então vais tu, que eu vou ficar em casa sozinha!” e não saí dali...

M- Rigidez, não é?

P13- Sim!

CM- Deixem-me fazer uma última pergunta, penso que já fizemos aos outros, que penso que era, a nível também da questão dos custos, que é, pensando num número redondo, ou não redondo, enfim... Quanto é que vocês estimam que precisariam por mês para estarem mais confortáveis e recuperar também mais do vosso tempo, para sentirem realmente confortáveis, garantindo que as vossas mães estavam bem e vocês tinham mais qualidade de vida... Estamos a falar de um montante de que ordem? Que valor?

P14- Eu neste momento estou a pôr do meu dinheiro, porque enfim, é dinheiro que posso vir um dia a precisar, não é? Ah.... Estou a pôr à volta de 400€...

CM- 400€, portanto, com 400€... Ou seja, se tivesse aí um suplemento de 400€ já sentia que resolvia a situação... E no seu caso?

P14- Já, já... Já...

P13- Eu nem falo, eu nem falo muito acerca de dinheiro, eu falo mais em termos de tempo para nós...

P14- Pois!

CM- Exato, mas o tempo pode ser convertido em dinheiro, não é? Pode, com dinheiro, imagine, poderia ter alguém para cuidar da mãe, poderia ter... Se ela aceitasse, se ela aceitasse...

P13- [risos] O pior são os valores! Exato! Pelos valores que eles nos pedem, eles nos pedem entre os 900-1000, onde é que eu vou buscar isso? Eu tenho renda para pagar, tenho água, luz, telefone, gás.... Fora alimentação, calçado, vestuário e os medicamentos... Se eu tirar esses 900 ou os 1000 eu fico com.... zero! E o que eu faço ao resto das outras coisas?

CM- Portanto, seriam 1000€?

P13- Não digo tanto, mas há volta de 500...

CM –500... 400, 500, ok.... Pelo menos para ajudar em alguma coisa, e mesmo assim, ainda temos de fazer, como é que eu hei-de dizer...

P14- Sim, não se pode esbanjar...

P13- Exatamente!

CM- Fazer uma boa gestão...

P14- Porque eu, por exemplo, podia ir almoçar mais vezes, se calhar, com amigos, sair ou.... Há colegas de trabalho, eu, há mais de um ano, agora já disse que tinha de ir, eu, há mais de ano que não vou... Porque também corto um bocado nessas despesas!

P13- Exato, e eu já, eu vejo-me agora a procurar, mesmo para fazer compras e tudo, coisas mais baratas para ir... Porque o dinheiro não chega para tudo!

P14- Sim... Eu sempre procurei e sempre fui, nos supermercados e não foi só no tempo de crise, procurei sempre as coisas mais acessíveis, sempre tive esse cuidado e sempre pus isso na cabeça da minha filha, ela também já tem, eu já tenho duas netas e também já tem um bocado esse espírito... Mas pronto cada vez se sente mais isso, não é? Que também há pessoas...

P13- Mas se calhar.... Exato, que as coisas também vão ficando mais caras, mas se calhar naquela altura, conseguia fazer mais coisas do que se calhar faz agora...

P14- Quando eu estava a trabalhar? Ah isso fazia... Eu viajava quase todos os anos, fazia uma, tínhamos um grupo de amigos e viajávamos, eu agora eu não faço nada disso, elas vão, mas eu fico cá...

P13- É isso também que eu falo, um bocado de ter tempo para nós, porque a gente não tem tempo para nós, ou seja, o tempo que nós temos, nós temos tempo, mas o tempo é para elas, não é para nós!

P14- Pois é!

P13- E nós acabamos por ser esquecidas, digamos assim, postas, vamos ser postas num baú, porque neste momento, elas precisam de nós!

P14- Eu mesmo estando em casa, eu quando lá vou, vou aí por volta das 3, saio de casa por volta das... As manhãs passam num instante, e eu chego de casa por volta das 8!

P13- E o que é que fez durante esse tempo todo?

P14- Estive lá com ela!

P13- Ou seja, digamos, o tempo tem 24 horas, certo? Então, teve lá, de manhã, digamos que esteve a descansar, mais ou menos até 11...

P14- Vou um bocadinho à universidade, porque tenho que ir, porque preciso, para minha cabeça... Não fico na cama, até às tantas, não fico...

P13- Depois.... Pronto.... Exato, depois tem aquele tempo que vai ver a sua mãe mais ou menos até 8, 9...

P14- É.… às 8...

P13- Chega a casa, ou seja, a partir das 8, 9.... Das 9 para cima, digamos até à meia noite, que vai deitar-se... Onde é que arranja tempo que sobra para si?

P14- Sento-me no sofá, faço qualquer coisa... Não me apetece fazer mais nada...

P13- E onde é que arranja, só esse tempo para si? Vai para casa, tem as coisas para fazer em casa...

P14- O tempo para mim é mais ao fim de semana que vou para, ou vou à minha filha, ou vou com as minhas netas, ou vou fazer qualquer coisa... Porque ela também já tem 21 anos, a outra tem 15.... Conversamos, fazemos...

P13- Agora suponhamos que não tinha fim de semana, como é que fazia? Onde é que arranjava o tempo para si?

P14- Pois, mas no fim de semana, vou à minha mãe, à mesma! Percebe?

P13- Sim...

M- Também já teve essa fase, na fase em que tinha a mãe consigo em casa, o fim de semana já não era só para si, já era com a mãe... Que é a situação da P13...

P14- Ah, não ia, pois não.... Pronto, vinha a minha filha à minha casa, em vez de eu ir a casa dela, quando ela podia ir, ainda a levava, não é? ...

P13- Mas não tinha o tempo só, só, só para si.... É isso que eu estou-lhe a questionar... Não tinha tempo para si...?

CM- É isso que sente para si?

P13- Exato! Nós não temos tempo para nós, nós mesmo!

P14- Eu quando trabalhava, eu também saía sempre tarde... E pronto...

P13- Mas se calhar tinha...

CM- Já agora, no seu caso, P13, quantas horas é que diria que são mesmo suas, por dia?

P13- É só quando eu estou a trabalhar! [risos]

CM- E lazer ou fora do trabalho?

P13- Não tenho...

P14- Não tem... pois...

CM- É só aquele bocadinho em que a mãe está a dormir ou coisa parecida, como disse há pouco?

P13- Exatamente.... É só esse bocadinho...

M- Também tem este mecanismo, de aproveitar um bocadinho que a mãe está, quando se deita, à noite, ficar... Isso é muito comum.... Tem sido relatado...

P13- É ficar.... Fico um bocado acordada e estou a ler ou a ver televisão ou assim, mais nada...

CM- Isso representa o quê? É uma hora, duas, três, é o quê?

P13- Umas duas horas, nem tanto...

CM- Portanto, diria que é o tempo que tem para si, é duas horas...

P13- Exato! Porque de resto, eu estou ocupada ou pelo trabalho ou por ela! Nem mesmo as folgas que tenho, digamos que tenho o dia inteiro, não tenho só para mim, as folgas são para ela...

M- Como é que ela ficou agora? Já agora? Enquanto está aqui?

P13- Ficou bem, ficou lá em casa sozinha...

M- Ficou sozinha?

P13- Sim...

CM- Ok...

P14- Está... A doença está numa fase inicial, não é?

P13- Não, já não está na fase inicial, ela já tem, já está há cinco anos com ela...

P14- Sim, mas ainda pode deixá-la sozinha em casa...

P13- Com tudo desligado.... Exatamente.... Principalmente o gás e isso...

P14- Tudo desligado, por causa do fogão, disto, daquilo, nós nunca estamos descansadas!

P13- Não, a única parte que eu deixo acesa ainda, é a parte do esquentador, que é para ela tomar banho e isso, porque ela ainda é autónoma, consegue fazer essas coisas sozinha...

P14- Ela toma banho sozinha?

P13- Mas mexer no fogão, ferros e isso, já não...

M- Muito bem!

CM- Muito obrigado por terem vindo, ainda para mais para falar de assuntos difíceis, não é? Às vezes acontece que as pessoas trocam experiências que podem ser uteis umas para as outras, espero que tenha acontecido...

P14- De nada.... Pronto, mas em relação a isso, veja a questão dos medicamentos...

P13- Sim, tenho que ver...

P14- Porque aí vai poupar! Ou veja na net... E fale à médica disso, fale à médica para passar a receita...

P13- É assim, isso mesmo assim, isso mesmo assim, ainda... Isso mesmo assim, ainda em termos do início, estou a conseguir poupar alguma coisa, porque ao início, eu não sabia de nada e gastava balúrdios, chegava a gastar entre 50, 60, 70 euros...

P14- Pois, gastava-se porque também, não havia ainda os genéricos!

P13- Exatamente, sim!

P14- E gastava-se, eu sei que essa memantina chegava a custar 70€... Agora pago menos...

P13- E mesmo aqueles Sticks para pôr nas costas, os adesivos...

P14- Olhe, eu isso por acaso, não conheço...

P13- Sim, a minha mãe inicialmente, era isso que ela... que ela fazia, punha uns adesivos, isso era para ajudar na memória, também... Ela punha, e só isso, custava à volta de 40, 50€...

P14- Eu por acaso, o médico nunca me falou disso...

P13- Ela ao início fazia, ela teve fases, até que chegou aos 13 valores, o corpo dela rejeitou e então ela teve que passar para comprimidos...

M- Muito bem, dependo do caso, há casos que pode ser assim, outros não pode...

P13- E por isso que eu digo, que cada um tem as suas fases, não é? A doença pode ser a mesma, Alzheimer, mas cada pessoa, desenvolve de várias formas...

P14- Pois é isso!

CM- Muito obrigada

M- Obrigada

P14- De nada...

| ***Additional file 3***  Table 1- Focus group participant quotes - caregiver changes in quality of life | | |
| --- | --- | --- |
| Theme | Sub-theme | Quote |
| Caregiver personal life | Activities renouncement | *"I used to go to the cinema every week, it was something I stopped doing…. Going to the cinema with her is unthinkable, I stopped doing it…", Caregiver, female (daughter), Focus group C, lines 4708-4709.* |
| *"I already went to water aerobics and took my husband, at the beginning, (...) until I started, I gave up on him and I started to go and take him, he stayed in the coffee, it had a big glass, until he I started to disappear and I no longer had to give up ...", Caregiver, female (wife), Focus group C, lines 5207-5211.* |
| *"Yes, and I had to give up many things, I was like going out with friends, right? Either I would drink coffee or go to the disco and still go to the gym and even that I had to abdicate, because every time we say I have it later I dedicate it to her ...", Caregiver, female (daughter), Focus group D, lines 5832-5834.* |
| Social isolation | *"No, I haven't been with my friends in a while ... A long time ago ... I isolated myself, yes, they really say that I isolated myself ... Practically …", Caregiver, female (daughter), Focus group D, lines 5819-5820.* |
| *"Nor is it, I mean, I don't have the patience to be …", Caregiver, male (husband), Focus group A, line 1346.* |
| *"Friendships I have lost, I have not lost, I move away a little… there is no time… because…", Caregiver, female (sister), Focus group A, line 1202.* |
| Life *in pause* | *"I don’t know, sometimes it was, but it was very complicated, it was a lot of wear, it was a lot of wear… Because it’s like that, I almost stopped having life, right?", Caregiver, female (daughter), Focus group B, line 2886-2887.* |
| *"Because we no longer have a life of our own ... Even with money, we no longer have a life of our own, so whether or not we really have the money to hire someone and be comfortable, or we stay the same!", Caregiver, female (daughter), Focus group C, lines 4308-4311.* |
| Physical health | Tiredness | *"(…) Because I think, ok, she’s at home all week, while I’m at work, on the days when I’m off, sometimes… Ok, I’m at home because sometimes I don’t feel like being leave, or I'm so tired ... ”, Caregiver, female (daughter), Focus group D, lines 5839-5841.* |
| Physical effort | *"I have to carry with her that my mother is heavier than me… [laughs]… I have to carry with her into the bathtub and then she shakes, and then “there it’s hot”, “there it’s cold” and put my white hair [laughs]… more essentially for that…", Caregiver, female (daughter), Focus Group A, lines 463-465.* |
| Sleep problems | *"Right now, being with her night and day, permanently ... Even when I am, I am more tired, I don't sleep at all, do I?", Caregiver, male (husband), Focus Group A, lines 659-660.* |
| Postpone health care | *"A person does not have time for anything, I need to go to the doctor and I will not go, because I am already saturated, in the hospital and at the doctor… I need to go and deal with this, I need to see a problem in my throat, and I will not, because I already know, if I go, it's exams exams exams ... I stay!! ... Just thinking that I have to do all that with my mother, I mean, it's the time that there is no time for us too, nor patience ...", Caregiver, female (sister), Focus group A, 1903-1906.* |
| Psychological health | Emotional stress | *"This is life? Life is if I was fine, we would go for a walk and that's it, even if it was just going for a walk, drinking a cup of coffee …", Caregiver, male (husband), Focus Group A, lines 1295-1296.* |
| *"... That is, my life is to live one day at a time, one day ... because I have no taste in living, I already told my daughter, the youngest, that she is a teacher, I said look at me, talking, I am a person who tells everything, they are asking questions or you want something ... I throw everything out, nothing is hidden, what comes out will have to come out ...", Caregiver, male (husband), Focus group A, lines 1278-1281.* |
| *"…Even horrible! And it’s costing me a lot, but it’s like this, it’s impossible, it’s like this, it’s impossible to have her at home, even if I wanted to find people…", Caregiver, female (daughter), Focus group B, lines 2636-2637.* |
| Dealing with diagnosis | *"And then, I, at the beginning, didn’t really explain what Alzheimer was ... I went to the internet out of curiosity and everything I read, I just wanted to send the cell phone, because I was watching through the cell phone, by the air ... Because it was each story and each testimony that a person was left: "Okay, will my mother forget me?" ... Yeah ... It was just one of the things that I was afraid of, is that my mother would look at me and not know who I was ...", Caregiver, female (daughter), Focus group D, lines 5437-5441.* |
| *"It is a bit difficult [laughs]…. It is a bit difficult to manage the things that at this moment ... (...) My mother and that, in the first exam, did not accuse well, well what was it ... Only later, (…) yes, it was that he was accused of dementia ... At that time it was a shock for me ...", Caregiver, female (daughter), Focus group D, lines 5425-5433.* |
| Felling alone | *"And then, there is also loneliness, because this implies the person giving up going out with friends, in my case, because she lives alone with me!", Caregiver, female (daughter), Focus group B, lines 3578-3580.* |
| Decision making | *" (…) I already lived alone, so when I brought her it was an option, my son was against it, my daughter-in-law was against it, but it was what I chose, was what I decided…", Caregiver, female (daughter), Focus group B, lines 2928-2930.* |

| Table 2- Focus group participant quotes - dementia informal care related costs | | |
| --- | --- | --- |
| Theme | Sub-theme | Quote |
| Food issues |  | *“If I didn’t have it, and I’m very aware of it, to write it down, I have a son-in-law as I said he has a factory related to food, he has twenty-one employees and he gives me the food because if I had to buy the food with a reform it’s €450, (…) If he didn’t give me the meals, I couldn’t eat or there wasn’t that woman I pay €500 a month, 3 hours a day, that's €7.50 an hour, gives €120 a week, something like that ... I couldn't pay!", Caregiver, male (husband), Focus group A, lines 1459-1464.* |
| *“I, for example, think that hygiene (…), I don't know more or less how much I spend, I don't know, but I do know that my brother eats very well, really well and I never cut it, so it is not enough for all the…And ready, what can be done is done.", Caregiver, female (sister), Focus group A, lines 1563-1565.* |
| Hygiene issues |  | *"Yes! ... Especially to have someone who would take care of her, for the bath… mainly for the bath, which is what costs me the most because she runs away from the water and screams that she doesn't want a bath… So much so that she now has medication reinforced to calm her down in the morning, when I want her… get her ready and give her a bath… -“let's go to the bath”, “I don't want to, I already washed, I already took, why so much bath, why so much bath?”, Caregiver, female (daughter), Focus group A, lines 458-462.* |
| *"It is when she urinate all over and it is crazy in this big country that diapers…, there are no diapers that can withstand the urine she makes…", Caregiver, male (husband), Focus group A, lines 821-822.* |
| Electricity |  | *"Yes, there are two clothes machines every day …", Caregiver, female (sister), Focus group A, lines 1567-1568.* |
| Medication/medical exams |  | *"No, no, it is like this ... it is generic medication, if it is not generic it is a lot of money! I had to go to generics! ... Unfortunately! …", Caregiver, female (daughter), Focus group A, lines 1537-1538.* |
| *"(...) So what do we caregivers (…), who work, have expenses, have things to pay, how do we do for our expenses and not only for the expenses of the patient, because unfortunately the drugs are expensive ... How do we do it, or how do we manage it?", Caregiver, female (daughter), Focus group D, lines 5478-5481.* |
| *"Oh, for example, when we are going to do some exams, there are her exams ... Just yesterday, I went to do the multipurpose exam with her, I paid her €12 …", Caregiver, female (sister), Focus group D, lines 6009-6010.* |
| Formal care | Day center | *"It is the social day center, which is not free, unfortunately there are still people who find it expensive, you know?… There are people who think it is very expensive, €7 a month… you know that there are people with a lot of difficulties…", Caregiver, male (husband), Focus group A, lines 1550-1552.* |
| Nursing home | *"€1700, €, 2000it's a shame what I was asked for!", Caregiver, female (wife), Focus group C, line 5088.* |
| *"(...), so I pay €850, before I paid €1000, and in the meantime, I asked for it at nursing home (...), Then I presented my income there, my monthly fee went down, at this point I pay €850 ( ...) ", Caregiver, female (daughter), Focus group D, lines 6088-6089.* |
| Formal caregiver | *"(...) So this lady helped me with daily hygiene, but she went two hours a day in the morning, on weekends she didn't go and I paid her €600 a month… Until she was a year and then I had to give up because I couldn´t take more!", Caregiver, female (daughter-in-low), Focus group C, lines 4293-4295.* |
| *"Having someone at home is, I ordered a lot, I have been these months, I have not stopped looking and they ask me, at least €1000, more everything ... And they asked me for more …", Caregiver, female (daughter), Focus group C, lines 4270-4271.* |
| Transport |  | *"So, I already must pay almost €200 if I want my mother's transport (to day center), (...) I mean, €200, so I pay an instalment for a car, right? With 200€ …", Caregiver, female (daughter), Focus group C, lines 5316-5318.* |
| Deceit the Person with dementia |  | *"The man says: -"Ah, now I need the money", so this, go down to the ATM… (...) In conclusion, she takes €100 from the account, gives the man €100, but, and it was enough, it was… it was my fault at that time, he takes the card from her without her realizing it, right?", Caregiver, female (daughter), Focus group A, lines 971-975.* |
| Lack of financial support |  | *"And… and then he has a reform, despite being a doctor, very small…", Caregiver, female (sister), Focus group A, line 291.* |
|  | *"She (Person with dementia) has a subsidy, a fortune, of 105€ a month ...", Caregiver, male (husband), Focus group A, line 362.* |

Table 3- Focus group participant quotes - positive and negative aspects of formal care services

| Theme | Sub-theme | Quote |  |  |  |
| --- | --- | --- | --- | --- | --- |
| Home support services | Support in personal hygiene | *"(…)He gets up and I see that he is all wet, the lady has been going twice a week to bathe him because he can't do it and I'm not here either, I can't do this job …", Caregiver, female (sister), Focus group A, lines 1048-1050.* |  |  |  |
| Day center | Positive aspects | *"(...) And as for the day care center, I must say that in problems with dementia I had a fantastic welcome!", Caregiver, female (daughter), Focus group B, lines 2497-2498.* |  |  |  |
| *"(...) The day center was good, I had assistance, there were some, cognitive stimulation, they had a gym, ready, and I started taking it 3 days a week ..", Caregiver, female (daughter), Focus group D, lines 5581-5583.* |  |  |  |
| Negative aspects | *"But by chance it is a pity, that there are no more day centers like this one, because this one, gives me an idea that it must be the only one that is a closed day center!", Caregiver, female (daughter), Focus group C, lines 4145-4146.* |  |  |  |
| Nursing home | Positive aspects | *(After putting the mother at the nursing home) “I recovered (my life) a little, but ... I enrolled in a senior university, to force myself to leave the house, because I am not much to stay at home…”, Caregiver, female (daughter), Focus group D, lines 6169-6170.* |  |  |  |
| Negative aspects | *"Sometimes we get a little angry, but that is sometimes good because I think, when I go, I’ve already gone to nursing homes and I think: This is better for us to be angry with him, than for him to be here… Okay, this is true, frankly that's what I think", Caregiver, female (sister), Focus group A, lines 1068-1071.* |  |  |  |
| *"It is the problem of homes I think, it is the big problem, because a person is not enough to feed him and give him a roof! It is not enough! And that is the problem!", Caregiver, female (daughter), Focus group C, lines 4142-4143.* |  |  |  |
| Barriers to access formal care | Cost | *"The answer is either the person puts it in a residence, like I put it this year to go on vacation, put it in a residence, or else contact those companies like I hired that are expensive, right? One week I paid 900€!", Caregiver, female (daughter), Focus group B, lines 3592-3594.* |  |  |  |
| *"How can I have a caregiver at home, if the caregivers are around 750€ and up ... Where do I get this money if I don't have it?", Caregiver, female (daughter), Focus group D, lines 5890-5891.* |  |  |  |
| *"And we also have no possibility to pay for a nursing home…. Monetarily…", Caregiver, female (wife), Focus group C, line 4691.* |  |  |  |
| Limited spaces | *"And it was very complicated and so, they chose, both he and my sister-in-law, to arrange a day center, because the nursing home was impossible to find like that from one moment to the next…", Caregiver, female (daughter-in-low), Focus group C, lines 4688-4689.* |  |  |  |
| Long process | *"There I am, for my husband there, I prefer to be paid a person to have at home, the (name of the institution), where we go, today I lack this paper, tomorrow I lack that, then another , it's just bureaucracy! …", Caregiver, female (wife), Focus group C, lines 5104-5106.* |  |  |  |
| Person with dementia will | *My (mother), I tried, but she didn't want (to go to the day center)…", Caregiver, female (daughter), Focus group B, line 2410.* |  |  |  |
| Transport/road accesses | *"No, but I don't drive, if my husband gets sick, I can't bring him …", Caregiver, female (daughter-in-low), Focus group C, line 5360.* |  |  |  |
| *"And then no and that, the bus is on the road to (location) and she has to go up the whole street to get home (...) everything is going up, I mean, she has arthrosis in her hips, there are many I mean, it's a situation, they ask for a lot of money for the van ...", Caregiver, female (daughter), Focus group C, lines 5397-5399.* |  |  |  |
| Lack of formal support | Targeted care | *"Now this is how it is going to be? Is it a long shot? Yes! Portugal is in the third world, it is, in terms of that, these patients need very special care!", Caregiver, female (daughter), Focus group B, lines 3660-3661.* |  |  |  |
